# Supplementary material
Source: publisher site journal article supplement (http://static.cambridge.org/content/id/urn:cambridge.org:id:article:S0016756820000370/resource/name/S0016756820000370supp001.xlsx)
Supplement: Supplementary file 1 [file S0016756820000370supp001.xlsx]

## Sheet: PlotDat1
Source sheet	IMA01_SS1_All_Integrations	0.85	0.0972	0.637621	0.0806498	1.6818	0.167804	3.39176	0.261987	6.19203	0.363766	10.7778	0.473753	18.2875	0.592611	0	0	0	0	0	0	0.636279	0.0806498	0.897731	0.0976795	10.2524	0.467608	0.570806	0.0717704	1.18595	0.12449	0.861253	0.0998466	6.16686	0.354756	5.65463	0.331864	0.911507	0.107268	0.799358	0.0951904	0.945268	0.107514	0.917836	0.105027	0.824164	0.0960021	0.849477	0.101575
Plot name	Concordia1	10.13	0.4634	0.637566	0.0806807	1.68162	0.167871	3.39133	0.262095	6.19108	0.363922	10.7758	0.473964	18.2836	0.592885	0.120359	0.0180623	0.120359	0.0180307	0.120359	0.0180938	1.67741	0.167804	0.895792	0.0982659	10.2474	0.468641	0.569953	0.0721285	1.18393	0.125085	0.860268	0.100257	6.16088	0.355877	5.64913	0.332475	0.909616	0.107723	0.798604	0.0955605	0.94387	0.108203	0.916097	0.105488	0.822575	0.0965427	0.84848	0.101924
Plot Type	1	0.55	0.0712	0.637408	0.0807091	1.6811	0.167932	3.39005	0.262195	6.1883	0.364066	10.7701	0.474158	18.2725	0.593136	0.255205	0.0364508	0.255205	0.0363866	0.255205	0.036515	3.38099	0.261987	0.890142	0.0987659	10.2329	0.46925	0.567483	0.0724115	1.17811	0.125414	0.857478	0.100468	6.14349	0.356602	5.63318	0.33253	0.904111	0.108087	0.796424	0.095861	0.939808	0.108794	0.911029	0.105884	0.817941	0.097023	0.845581	0.102214
1st free col	13	1.137	0.1218	0.637158	0.0807327	1.68028	0.167983	3.38805	0.262278	6.18392	0.364185	10.7612	0.474319	18.2549	0.593345	0.406281	0.0551714	0.406281	0.0550734	0.406281	0.0552695	6.16853	0.363766	0.881241	0.099139	10.21	0.469385	0.563597	0.0725963	1.16895	0.12545	0.853111	0.100463	6.11609	0.356873	5.60805	0.332023	0.895437	0.10833	0.792994	0.0960674	0.933412	0.10924	0.903042	0.106185	0.810639	0.0974043	0.841014	0.102423
Sigma Level	2	0.838	0.0978	0.636837	0.0807496	1.67923	0.16802	3.38547	0.262337	6.17829	0.36427	10.7497	0.474434	18.2323	0.593494	0.57554	0.0742302	0.57554	0.0740971	0.57554	0.0743633	10.7297	0.473753	0.869809	0.0993551	10.1807	0.469035	0.558609	0.072668	1.15721	0.125191	0.84752	0.100242	6.0809	0.356669	5.5758	0.330995	0.884297	0.108433	0.788593	0.096163	0.925201	0.109504	0.892783	0.106366	0.80126	0.0976557	0.83515	0.102532
Absolute Errs	TRUE	6.02	0.351	0.63647	0.0807584	1.67803	0.168039	3.38252	0.262368	6.17187	0.364314	10.7366	0.474494	18.2065	0.593572	0.765171	0.0936333	0.765171	0.0934639	0.765171	0.0938026	18.1931	0.592611	0.856771	0.0993965	10.1473	0.468228	0.552924	0.0726208	1.14383	0.124656	0.841157	0.0998231	6.04079	0.356005	5.53902	0.329531	0.871594	0.108388	0.783576	0.0961401	0.915839	0.109566	0.881083	0.106411	0.790564	0.0977567	0.828464	0.102533
Symbol Type	1	5.52	0.3256	0.636089	0.0807584	1.67679	0.168039	3.37946	0.262368	6.16518	0.364314	10.7229	0.474494	18.1797	0.593572	0.977626	0.113387	0.977626	0.11318	0.977626	0.113594	IsoLine	IsoLine	0.843186	0.09926	10.1124	0.46703	0.547002	0.0724584	1.1299	0.123891	0.834538	0.0992406	5.99898	0.354936	5.5007	0.327748	0.858357	0.108197	0.778351	0.0960005	0.906086	0.109419	0.868891	0.106318	0.779416	0.0976992	0.821497	0.102427
Inverse Plot	FALSE	0.865	0.1066	0.635722	0.0807496	1.67559	0.16802	3.37652	0.262337	6.15876	0.36427	10.7097	0.474434	18.1539	0.593494	1.21565	0.133497	1.21565	0.133251	1.21565	0.133743			0.830152	0.0989566	10.079	0.465538	0.541323	0.0721941	1.11654	0.122956	0.8282	0.0985414	5.95889	0.353548	5.46394	0.325791	0.845658	0.107878	0.77334	0.0957555	0.89673	0.109077	0.857194	0.106094	0.768722	0.0974878	0.814814	0.102221
Color Plot	TRUE	0.781	0.0947	0.635401	0.0807327	1.67454	0.167983	3.37394	0.262278	6.15314	0.364185	10.6982	0.474319	18.1313	0.593345	1.48233	0.153971	1.48233	0.153685	1.48233	0.154257			0.818726	0.0985109	10.0497	0.463873	0.536347	0.0718493	1.10484	0.121927	0.822656	0.0977821	5.92374	0.351953	5.43173	0.323819	0.834526	0.107455	0.76895	0.0954251	0.88853	0.108566	0.846939	0.105757	0.759345	0.0971397	0.808956	0.101932
3D plot	FALSE	0.911	0.107	0.635151	0.0807091	1.67372	0.167932	3.37193	0.262195	6.14875	0.364066	10.6893	0.474158	18.1137	0.593136	1.7811	0.174814	1.7811	0.174486	1.7811	0.175141			0.809834	0.097959	10.027	0.46217	0.532477	0.0714519	1.09574	0.120888	0.818355	0.0970243	5.89639	0.350282	5.40667	0.321991	0.825862	0.106962	0.765536	0.0950359	0.882151	0.107929	0.838957	0.105334	0.752048	0.096683	0.804398	0.101584
Linear	FALSE	0.875	0.1047	0.634993	0.0806807	1.6732	0.167871	3.37066	0.262095	6.14598	0.363922	10.6836	0.473964	18.1025	0.592885	2.11583	0.196034	2.11583	0.195663	2.11583	0.196404			0.804196	0.0973456	10.0125	0.460566	0.530027	0.071034	1.08999	0.119923	0.815645	0.0963293	5.87905	0.348668	5.39079	0.320455	0.82037	0.10644	0.763375	0.0946195	0.878109	0.107216	0.833896	0.10486	0.74742	0.0961548	0.801508	0.101205
Data Range	H2:L121	0.785	0.0958	0.634938	0.0806498	1.67302	0.167804	3.37022	0.261987	6.14502	0.363766	10.6816	0.473753	18.0987	0.592611	2.49085	0.217637	2.49085	0.217222	2.49085	0.218052			0.802269	0.0967205	10.0076	0.459192	0.529194	0.0706296	1.08805	0.11911	0.814747	0.0957534	5.87314	0.347244	5.38537	0.319336	0.818493	0.105932	0.762642	0.0942096	0.876732	0.106486	0.832164	0.104373	0.745836	0.0955979	0.800523	0.100825
Filled Symbols	FALSE	0.825	0.1012	0.634993	0.0806188	1.6732	0.167737	3.37066	0.261879	6.14598	0.36361	10.6836	0.473543	18.1025	0.592338	2.911	0.23963	2.911	0.239169	2.911	0.240091			0.804208	0.0961341	10.0126	0.458159	0.530047	0.0702715	1.09007	0.118515	0.815732	0.0953434	5.87912	0.346123	5.39087	0.318725	0.820384	0.105477	0.763396	0.0938395	0.87813	0.105797	0.833903	0.103912	0.747425	0.0950573	0.80152	0.100476
ConcAge	FALSE	0.919	0.1091	0.635151	0.0805904	1.67372	0.167676	3.37193	0.261779	6.14875	0.363466	10.6893	0.473349	18.1137	0.592087	3.38173	0.262021	3.38173	0.261512	3.38173	0.262529			0.809858	0.0956341	10.0271	0.45755	0.532517	0.0699885	1.09589	0.118186	0.818522	0.0951324	5.89651	0.345398	5.40682	0.31867	0.825889	0.105113	0.765576	0.093539	0.882192	0.105206	0.838971	0.103516	0.752059	0.094577	0.804419	0.100186
ConcSwap	FALSE	6.25	0.3747	0.635401	0.0805668	1.67454	0.167625	3.37394	0.261696	6.15314	0.363347	10.6982	0.473188	18.1313	0.591878	3.90911	0.284816	3.90911	0.284258	3.90911	0.285373			0.818759	0.095261	10.05	0.457415	0.536403	0.0698037	1.10505	0.11815	0.822889	0.0951375	5.92391	0.345127	5.43195	0.319177	0.834563	0.10487	0.769006	0.0933326	0.888588	0.10476	0.846958	0.103215	0.759361	0.0941957	0.808986	0.0999774
1st Symbol-row	201	0.805	0.0975	0.635722	0.0805499	1.67559	0.167588	3.37652	0.261637	6.15876	0.363262	10.7097	0.473073	18.1539	0.591728	4.49997	0.308022	4.49997	0.307414	4.49997	0.30863			0.830191	0.0950449	10.0793	0.457765	0.541391	0.069732	1.11679	0.118409	0.82848	0.0953583	5.9591	0.345331	5.4642	0.320205	0.845703	0.104767	0.773407	0.093237	0.896799	0.104496	0.857217	0.103034	0.76874	0.0939443	0.81485	0.0998681
		0.787	0.0957	0.636089	0.0805411	1.67679	0.167569	3.37946	0.261606	6.16518	0.363218	10.7229	0.473013	18.1797	0.591651	5.16194	0.331648	5.16194	0.330988	5.16194	0.332308			0.843229	0.0950035	10.1127	0.458572	0.547076	0.0697792	1.13017	0.118944	0.834843	0.0957769	5.99921	0.345995	5.50098	0.321669	0.858406	0.104812	0.778424	0.0932599	0.906161	0.104434	0.868917	0.102989	0.779436	0.0938433	0.821536	0.0998668
		0.8	0.0959	0.63647	0.0805411	1.67803	0.167569	3.38252	0.261606	6.17187	0.363218	10.7366	0.473013	18.2065	0.591651	5.90359	0.355701	5.90359	0.354987	5.90359	0.356415			0.856814	0.09514	10.1476	0.45977	0.552998	0.0699416	1.1441	0.119709	0.841462	0.0963594	6.04102	0.347064	5.5393	0.323452	0.871643	0.105003	0.783649	0.0933995	0.915914	0.104581	0.881109	0.103082	0.790584	0.0939008	0.828503	0.0999734
		0.788	0.0926	0.636837	0.0805499	1.67923	0.167588	3.38547	0.261637	6.17829	0.363262	10.7497	0.473073	18.2323	0.591728	6.7345	0.380188	6.7345	0.379418	6.7345	0.380957			0.869848	0.0954434	10.181	0.461262	0.558677	0.0702059	1.15746	0.120644	0.8478	0.0970586	6.08111	0.348452	5.57606	0.325409	0.884342	0.105322	0.78866	0.0936445	0.92527	0.104923	0.892806	0.103306	0.801278	0.0941122	0.835186	0.100179
		2.053	0.173	0.637158	0.0805668	1.68028	0.167625	3.38805	0.261696	6.18392	0.363347	10.7612	0.473188	18.2549	0.591878	7.66542	0.405117	7.66542	0.40429	7.66542	0.405944			0.881274	0.0958891	10.2103	0.462927	0.563653	0.0705507	1.16916	0.121673	0.853344	0.0978179	6.11626	0.350047	5.60827	0.327381	0.895474	0.105745	0.79305	0.0939749	0.93347	0.105434	0.903061	0.103643	0.810655	0.0944603	0.841044	0.100468
		0.849	0.1027	0.637408	0.0805904	1.6811	0.167676	3.39005	0.261779	6.1883	0.363466	10.7701	0.473349	18.2725	0.592087	8.70839	0.430497	8.70839	0.42961	8.70839	0.431383			0.890166	0.096441	10.233	0.46463	0.567523	0.0709481	1.17826	0.122712	0.857645	0.0985757	6.14361	0.351718	5.63333	0.329209	0.904138	0.106238	0.796464	0.0943641	0.939849	0.106071	0.911043	0.104066	0.817952	0.094917	0.845602	0.100816
		0.749	0.0934	0.637566	0.0806188	1.68162	0.167737	3.39133	0.261879	6.19108	0.36361	10.7758	0.473543	18.2836	0.592338	9.87688	0.456335	9.87688	0.455387	9.87688	0.457282			0.895804	0.0970544	10.2475	0.466234	0.569973	0.071366	1.18401	0.123677	0.860355	0.0992707	6.16095	0.353332	5.64921	0.330745	0.90963	0.10676	0.798625	0.0947805	0.943891	0.106784	0.916104	0.10454	0.82258	0.0954452	0.848492	0.101195
		1.735	0.1707	0.637621	0.0806498	1.6818	0.167804	3.39176	0.261987	6.19203	0.363766	10.7778	0.473753	18.2875	0.592611	11.186	0.482639	11.186	0.481629	11.186	0.48365			0.897731	0.0976795	10.2524	0.467608	0.570806	0.0717704	1.18595	0.12449	0.861253	0.0998466	6.16686	0.354756	5.65463	0.331864	0.911507	0.107268	0.799358	0.0951904	0.945268	0.107514	0.917836	0.105027	0.824164	0.0960021	0.849477	0.101575
		0.882	0.1037	ConcTikEll	ConcTikEll	ConcTikEll	ConcTikEll	ConcTikEll	ConcTikEll	ConcTikEll	ConcTikEll	ConcTikEll	ConcTikEll	ConcTikEll	ConcTikEll	12.6527	0.509419	12.6527	0.508344	12.6527	0.510495
		0.762	0.095													14.296	0.536683	14.296	0.53554	14.296	0.537825
		0.863	0.1031													16.137	0.564439	16.137	0.563227	16.137	0.56565
		1.054	0.1189													18.1996	0.592696	18.1996	0.591413	18.1996	0.593979
		0.81	0.0968													20.5104	0.621464	20.5104	0.620107	20.5104	0.62282
		10.81	0.4457													23.0994	0.650751	23.0994	0.649319	23.0994	0.652183
		0.825	0.09833													26	0.680567	26	0.679058	26	0.682077
		0.883	0.1059													26	0.680567	26	0.679058	26	0.682077
		0.941	0.1046													IsoLine	IsoLine	ConcBand	ConcBand	ConcBand	ConcBand
		1.003	0.1144
		14.13	0.4917
		0.813	0.1023
		0.78	0.09467
		0.812	0.0954
		3.355	0.254
		8.734	0.4272
		0.981	0.1111
		0.798	0.0955
		1.767	0.1756
		0.767	0.0951
		0.835	0.0992
		0.817	0.0959
		0.781	0.0939
		0.84	0.1032
		0.75	0.104
		0.853	0.1019
		0.751	0.0923
		1.831	0.1789
		0.903	0.1049
		0.774	0.0919
		0.799	0.0951
		0.718	0.0886
		0.833	0.0997
		9.33	0.4407
		0.852	0.0999
		1.782	0.1744
		0.882	0.1077
		0.875	0.1001
		3.95	0.2686
		0.823	0.0967
		0.971	0.1086
		1.166	0.1221
		0.822	0.0916
		0.51	0.0673
		21.03	0.5528
		0.826	0.0988
		0.82	0.0961
		0.984	0.1074
		0.759	0.0859
		1.071	0.1183
		0.84	0.1027
		0.81	0.1
		6.432	0.3739
		0.799	0.0995
		6.11	0.3676
		1.63	0.1673
		8.51	0.4205
		5.46	0.3356
		0.695	0.0902
		0.852	0.1022
		1.08	0.1254
		0.946	0.1045
		1.037	0.1209
		0.886	0.1017
		0.921	0.1091
		0.853	0.0971
		0.863	0.1065
		0.878	0.1034
		1.794	0.1725
		1.005	0.1078
		2.407	0.2093
		1.932	0.177
		0.827	0.0972
		7.24	0.391
		1.21	0.136
		0.91	0.0946
		0.94	0.1088
		0.788	0.0968
		0.837	0.0996
		6.794	0.3799
		0.782	0.0947
		0.495	0.068
		0.531	0.0654
		0.779	0.0946
		0.752	0.0921
		0.84	0.0809
		0.793	0.0931
		0.845	0.0991
		0.76	0.0921
		0.864	0.108
		0.864	0.1028
		0.851	0.1005
		0.9	0.1059
		1.2	0.1311
		0.853	0.1003
		0.793	0.0954
		2.287	0.199
		IsoLine	IsoLine
				1.23916	0.132103	0.883597	0.100954	0.811358	0.0961855	2.33963	0.2002
				1.23756	0.13284	0.882345	0.10152	0.810596	0.0965827	2.33747	0.201129
				1.23291	0.133436	0.878715	0.101987	0.808408	0.0968841	2.33123	0.201885
				1.22559	0.133843	0.873003	0.102318	0.804973	0.0970652	2.3214	0.202408
				1.2162	0.134028	0.865669	0.102485	0.800567	0.0971115	2.30879	0.202655
				1.2055	0.133975	0.85731	0.102475	0.795548	0.097019	2.29441	0.202605
				1.19436	0.13369	0.848601	0.102289	0.790323	0.0967955	2.27943	0.202264
				1.18367	0.133195	0.840249	0.101942	0.785315	0.0964588	2.26507	0.201658
				1.1743	0.13253	0.832929	0.101462	0.780929	0.0960364	2.25248	0.200837
				1.16702	0.131749	0.827236	0.100887	0.777521	0.0955624	2.24269	0.199867
				1.1624	0.130915	0.82363	0.100265	0.775367	0.0950753	2.23648	0.198826
				1.16084	0.130097	0.822403	0.0996463	0.774642	0.0946145	2.23437	0.1978
				1.16244	0.12936	0.823655	0.0990801	0.775404	0.0942173	2.23653	0.196871
				1.16709	0.128764	0.827285	0.0986127	0.777592	0.0939159	2.24277	0.196115
				1.17441	0.128357	0.832997	0.098282	0.781027	0.0937348	2.2526	0.195592
				1.1838	0.128172	0.840331	0.0981148	0.785433	0.0936885	2.26521	0.195345
				1.1945	0.128225	0.84869	0.0981246	0.790452	0.093781	2.27959	0.195395
				1.20564	0.12851	0.857399	0.0983107	0.795677	0.0940045	2.29457	0.195736
				1.21633	0.129005	0.865751	0.0986579	0.800685	0.0943412	2.30893	0.196342
				1.2257	0.12967	0.873071	0.0991382	0.805071	0.0947636	2.32152	0.197163
				1.23298	0.130451	0.878764	0.0997126	0.808479	0.0952376	2.33131	0.198133
				1.2376	0.131285	0.88237	0.100335	0.810633	0.0957247	2.33752	0.199174
				1.23916	0.132103	0.883597	0.100954	0.811358	0.0961855	2.33963	0.2002
[truncated: 206 more columns]

## Sheet: PlotDat7
Source sheet	IMA01_SS1_All_Integrations	0.81	0.0968	0.344398	0.0476374	0.412373	0.0557947	0.483784	0.0640155	0.558806	0.0723004	0.637621	0.0806498	0.72042	0.0890642	0.807407	0.097544	0.898791	0.10609	0.994796	0.114702	1.09566	0.123382	1.20161	0.132129	1.31293	0.140944	1.42987	0.149828	0.3	0.0421844	0.3	0.0421099	0.3	0.0422589	0.343738	0.0476374	0.849164	0.0970927	0.852164	0.102368	0.895059	0.100645	0.519477	0.0681253	0.875925	0.103061	0.947059	0.105604
Plot name	Concordia6	0.813	0.1023	0.344372	0.0476554	0.41234	0.0558158	0.483744	0.0640399	0.558759	0.072328	0.637566	0.0806807	0.720358	0.0890984	0.807335	0.0975817	0.898709	0.106131	0.994703	0.114747	1.09555	0.12343	1.2015	0.132181	1.3128	0.141	1.42973	0.149887	0.316634	0.0442804	0.316634	0.0442021	0.316634	0.0443587	0.411563	0.0557947	0.847573	0.0976612	0.851307	0.102824	0.894095	0.101227	0.518484	0.0685671	0.874827	0.103589	0.946089	0.106076
Plot Type	1	0.851	0.1005	0.344294	0.0476719	0.412244	0.0558353	0.48363	0.0640623	0.558623	0.0723534	0.637408	0.0807091	0.720174	0.0891299	0.807125	0.0976164	0.89847	0.106169	0.994433	0.114788	1.09525	0.123475	1.20116	0.132229	1.31242	0.141051	1.42931	0.149942	0.343738	0.0476374	0.343738	0.047553	0.343738	0.0477217	0.482812	0.0640155	0.842938	0.0981599	0.848776	0.103258	0.891247	0.101776	0.515587	0.0689629	0.871637	0.104044	0.943235	0.106497
1st free col	13	0.495	0.068	0.34417	0.0476856	0.412093	0.0558514	0.483448	0.0640809	0.558409	0.0723745	0.637158	0.0807327	0.719886	0.0891561	0.806794	0.0976451	0.898094	0.1062	0.994007	0.114822	1.09477	0.123511	1.20062	0.132268	1.31182	0.141093	1.42864	0.149987	0.371399	0.0510051	0.371399	0.0509147	0.371399	0.0510956	0.557657	0.0723004	0.835635	0.0985484	0.844682	0.103649	0.886639	0.10227	0.511023	0.0692808	0.866613	0.104391	0.938623	0.106847
Sigma Level	2	0.849	0.1027	0.344012	0.0476954	0.411899	0.055863	0.483215	0.0640942	0.558134	0.0723896	0.636837	0.0807496	0.719514	0.0891748	0.806369	0.0976657	0.89761	0.106223	0.993459	0.114847	1.09415	0.123538	1.19993	0.132296	1.31105	0.141124	1.42778	0.150019	0.399629	0.0543837	0.399629	0.0542871	0.399629	0.0544804	0.636279	0.0806498	0.826255	0.0987953	0.839203	0.103982	0.880475	0.102686	0.505161	0.0694948	0.860162	0.104601	0.932454	0.107113
Absolute Errs	TRUE	0.903	0.1049	0.343832	0.0477006	0.411678	0.055869	0.48295	0.0641011	0.55782	0.0723974	0.63647	0.0807584	0.719091	0.0891846	0.805884	0.0976765	0.897058	0.106235	0.992835	0.114859	1.09345	0.123551	1.19914	0.132311	1.31017	0.141139	1.4268	0.150036	0.428441	0.0577732	0.428441	0.0576704	0.428441	0.057876	0.718871	0.0890642	0.815558	0.0988806	0.832579	0.104241	0.873022	0.103007	0.498475	0.0695878	0.852806	0.104656	0.924997	0.107282
Symbol Type	1	0.833	0.0997	0.343644	0.0477006	0.411448	0.055869	0.482673	0.0641011	0.557493	0.0723974	0.636089	0.0807584	0.71865	0.0891846	0.805378	0.0976765	0.896482	0.106235	0.992184	0.114859	1.09272	0.123551	1.19832	0.132311	1.30925	0.141139	1.42578	0.150036	0.457846	0.0611736	0.457846	0.0610645	0.457846	0.0612826	0.805631	0.097544	0.804411	0.0987973	0.825099	0.104415	0.864606	0.103218	0.491508	0.0695521	0.845143	0.104554	0.916579	0.107347
Inverse Plot	FALSE	1.071	0.1183	0.343463	0.0476954	0.411226	0.055863	0.482408	0.0640942	0.557179	0.0723896	0.635722	0.0807496	0.718227	0.0891748	0.804893	0.0976657	0.895931	0.106223	0.99156	0.114847	1.09201	0.123538	1.19753	0.132296	1.30837	0.141124	1.42481	0.150019	0.487856	0.0645849	0.487856	0.0644696	0.487856	0.0647001	0.89677	0.10609	0.793717	0.0985522	0.81709	0.104497	0.855596	0.103311	0.484824	0.0693907	0.837791	0.104301	0.907568	0.107305
Color Plot	TRUE	0.882	0.1037	0.343305	0.0476856	0.411033	0.0558514	0.482175	0.0640809	0.556904	0.0723745	0.635401	0.0807327	0.717856	0.0891561	0.804468	0.0976451	0.895447	0.1062	0.991012	0.114822	1.0914	0.123511	1.19684	0.132268	1.3076	0.141093	1.42395	0.149987	0.518484	0.0680071	0.518484	0.0678855	0.518484	0.0681287	0.99251	0.114702	0.784341	0.0981651	0.808902	0.104483	0.846385	0.103281	0.478965	0.0691166	0.831348	0.103918	0.898357	0.107158
3D plot	FALSE	0.55	0.0712	0.343182	0.0476719	0.410882	0.0558353	0.481994	0.0640623	0.55669	0.0723534	0.635151	0.0807091	0.717567	0.0891299	0.804137	0.0976164	0.89507	0.106169	0.990586	0.114788	1.09092	0.123475	1.1963	0.132229	1.307	0.141051	1.42328	0.149942	0.549742	0.0714404	0.549742	0.0713124	0.549742	0.0715683	1.09308	0.123382	0.777045	0.0976674	0.800894	0.104373	0.837376	0.103129	0.474404	0.0687521	0.826335	0.103437	0.889349	0.106912
Linear	FALSE	0.812	0.0954	0.343104	0.0476554	0.410786	0.0558158	0.481879	0.0640399	0.556554	0.072328	0.634993	0.0806807	0.717384	0.0890984	0.803927	0.0975817	0.894831	0.106131	0.990316	0.114747	1.09061	0.12343	1.19596	0.132181	1.30662	0.141	1.42286	0.149887	0.581644	0.0748847	0.581644	0.0747503	0.581644	0.075019	1.19873	0.132129	0.772418	0.0970995	0.793415	0.104173	0.828962	0.102862	0.471512	0.0683266	0.823158	0.102896	0.880938	0.106578
Data Range	H:L	0.919	0.1091	0.343077	0.0476374	0.410753	0.0557947	0.481839	0.0640155	0.556508	0.0723004	0.634938	0.0806498	0.717321	0.0890642	0.803855	0.097544	0.894749	0.10609	0.990223	0.114702	1.09051	0.123382	1.19585	0.132129	1.30649	0.140944	1.42271	0.149828	0.614202	0.07834	0.614202	0.0781993	0.614202	0.0784808	1.30971	0.140944	0.770836	0.0965073	0.786791	0.103891	0.821512	0.102492	0.470523	0.0678747	0.822075	0.102339	0.873491	0.106171
Filled Symbols	FALSE	0.798	0.0955	0.343104	0.0476194	0.410786	0.0557735	0.481879	0.0639912	0.556554	0.0722728	0.634993	0.0806188	0.717384	0.0890299	0.803927	0.0975064	0.894831	0.106049	0.990316	0.114658	1.09061	0.123334	1.19596	0.132077	1.30662	0.140889	1.42286	0.149769	0.647431	0.0818065	0.647431	0.0816593	0.647431	0.0819537	1.42629	0.149828	0.772427	0.0959388	0.781313	0.103539	0.81535	0.102035	0.471516	0.0674329	0.823173	0.101811	0.867333	0.105708
ConcAge	FALSE	0.751	0.0923	0.343182	0.0476028	0.410882	0.0557541	0.481994	0.0639688	0.55669	0.0722474	0.635151	0.0805904	0.717567	0.0889984	0.804137	0.0974717	0.89507	0.106011	0.990586	0.114617	1.09092	0.123289	1.1963	0.13203	1.307	0.140838	1.42328	0.149714	0.681344	0.0852841	0.681344	0.0851304	0.681344	0.0854378	IsoLine	IsoLine	0.777062	0.0954401	0.77722	0.103134	0.810746	0.101511	0.474413	0.0670371	0.826363	0.101356	0.862734	0.10521
ConcSwap	FALSE	0.882	0.1077	0.343305	0.0475891	0.411033	0.055738	0.482175	0.0639502	0.556904	0.0722263	0.635401	0.0805668	0.717856	0.0889722	0.804468	0.0974429	0.895447	0.10598	0.991012	0.114583	1.0914	0.123253	1.19684	0.13199	1.3076	0.140795	1.42395	0.149669	0.715954	0.0887729	0.715954	0.0886127	0.715954	0.0889332			0.784365	0.0950516	0.774691	0.102692	0.807901	0.100942	0.478977	0.0667192	0.831387	0.101009	0.859896	0.104699
1st Symbol-row	201	0.695	0.0902	0.343463	0.0475793	0.411226	0.0557264	0.482408	0.0639369	0.557179	0.0722112	0.635722	0.0805499	0.718227	0.0889535	0.804893	0.0974224	0.895931	0.105957	0.99156	0.114558	1.09201	0.123226	1.19753	0.131962	1.30837	0.140765	1.42481	0.149637	0.751278	0.0922729	0.751278	0.0921061	0.751278	0.0924397			0.793745	0.0948047	0.773836	0.102232	0.806941	0.100355	0.484839	0.0665052	0.837838	0.100799	0.858941	0.104196
		0.853	0.1019	0.343644	0.0475742	0.411448	0.0557204	0.482673	0.06393	0.557493	0.0722034	0.636089	0.0805411	0.71865	0.0889437	0.805378	0.0974116	0.896482	0.105945	0.992184	0.114546	1.09272	0.123213	1.19832	0.131947	1.30925	0.140749	1.42578	0.14962	0.787328	0.0957842	0.787328	0.0956107	0.787328	0.0959576			0.804442	0.0947194	0.774693	0.101776	0.807905	0.0997734	0.491525	0.0664122	0.845194	0.100744	0.859911	0.103724
		0.779	0.0946	0.343832	0.0475742	0.411678	0.0557204	0.48295	0.06393	0.55782	0.0722034	0.63647	0.0805411	0.719091	0.0889437	0.805884	0.0974116	0.897058	0.105945	0.992835	0.114546	1.09345	0.123213	1.19914	0.131947	1.31017	0.140749	1.4268	0.14962	0.824121	0.0993067	0.824121	0.0991266	0.824121	0.0994868			0.815589	0.0948027	0.777224	0.101342	0.810753	0.0992238	0.498492	0.0664479	0.852857	0.100846	0.862765	0.103303
		0.82	0.0961	0.344012	0.0475793	0.411899	0.0557264	0.483215	0.0639369	0.558134	0.0722112	0.636837	0.0805499	0.719514	0.0889535	0.806369	0.0974224	0.89761	0.105957	0.993459	0.114558	1.09415	0.123226	1.19993	0.131962	1.31105	0.140765	1.42778	0.149637	0.861671	0.102841	0.861671	0.102654	0.861671	0.103027			0.826283	0.0950478	0.781318	0.100951	0.815361	0.0987301	0.505176	0.0666093	0.860209	0.101099	0.867377	0.102953
		0.8	0.0959	0.34417	0.0475891	0.412093	0.055738	0.483448	0.0639502	0.558409	0.0722263	0.637158	0.0805668	0.719886	0.0889722	0.806794	0.0974429	0.898094	0.10598	0.994007	0.114583	1.09477	0.123253	1.20062	0.13199	1.31182	0.140795	1.42864	0.149669	0.899994	0.106386	0.899994	0.106192	0.899994	0.106579			0.835659	0.0954349	0.786797	0.100618	0.821525	0.0983137	0.511035	0.0668834	0.866652	0.101482	0.873546	0.102687
		0.85	0.0972	0.344294	0.0476028	0.412244	0.0557541	0.48363	0.0639688	0.558623	0.0722474	0.637408	0.0805904	0.720174	0.0889984	0.807125	0.0974717	0.89847	0.106011	0.994433	0.114617	1.09525	0.123289	1.20116	0.13203	1.31242	0.140838	1.42931	0.149714	0.939105	0.109942	0.939105	0.109742	0.939105	0.110143			0.842955	0.0959326	0.793421	0.100359	0.828978	0.0979928	0.515596	0.0672479	0.871665	0.101963	0.881003	0.102518
		0.835	0.0992	0.344372	0.0476194	0.41234	0.0557735	0.483744	0.0639912	0.558759	0.0722728	0.637566	0.0806188	0.720358	0.0890299	0.807335	0.0975064	0.898709	0.106049	0.994703	0.114658	1.09555	0.123334	1.2015	0.132077	1.3128	0.140889	1.42973	0.149769	0.979022	0.113511	0.979022	0.113303	0.979022	0.113718			0.847582	0.0965005	0.800901	0.100185	0.837394	0.0977815	0.518488	0.0676734	0.874842	0.102504	0.889421	0.102453
		0.788	0.0968	0.344398	0.0476374	0.412373	0.0557947	0.483784	0.0640155	0.558806	0.0723004	0.637621	0.0806498	0.72042	0.0890642	0.807407	0.097544	0.898791	0.10609	0.994796	0.114702	1.09566	0.123382	1.20161	0.132129	1.31293	0.140944	1.42987	0.149828	1.01976	0.11709	1.01976	0.116876	1.01976	0.117304			0.849164	0.0970927	0.80891	0.100103	0.846404	0.0976891	0.519477	0.0681253	0.875925	0.103061	0.898432	0.102495
		0.875	0.1047	ConcTikEll	ConcTikEll	ConcTikEll	ConcTikEll	ConcTikEll	ConcTikEll	ConcTikEll	ConcTikEll	ConcTikEll	ConcTikEll	ConcTikEll	ConcTikEll	ConcTikEll	ConcTikEll	ConcTikEll	ConcTikEll	ConcTikEll	ConcTikEll	ConcTikEll	ConcTikEll	ConcTikEll	ConcTikEll	ConcTikEll	ConcTikEll	ConcTikEll	ConcTikEll	1.06134	0.120681	1.06134	0.12046	1.06134	0.120902					0.817098	0.100117	0.855615	0.0977194					0.907643	0.102642
		0.864	0.1028																											1.10377	0.124284	1.10377	0.124056	1.10377	0.124512					0.825106	0.100227	0.864624	0.0978713					0.916651	0.102888
		0.762	0.095																											1.14708	0.127898	1.14708	0.127663	1.14708	0.128133					0.832585	0.100427	0.873038	0.0981381					0.925062	0.103222
		1.037	0.1209																											1.19128	0.131524	1.19128	0.131282	1.19128	0.131766					0.839209	0.100709	0.880488	0.0985081					0.932509	0.103629
		0.865	0.1066																											1.23638	0.135161	1.23638	0.134912	1.23638	0.13541					0.844687	0.101061	0.88665	0.0989652					0.938667	0.104092
		1.08	0.1254																											1.28242	0.13881	1.28242	0.138554	1.28242	0.139066					0.84878	0.101466	0.891254	0.0994894					0.943266	0.10459
		0.51	0.0673																											1.3294	0.142471	1.3294	0.142208	1.3294	0.142734					0.851309	0.101908	0.894099	0.100058					0.946104	0.105101
		0.759	0.0859																											1.37736	0.146144	1.37736	0.145873	1.37736	0.146414					0.852164	0.102368	0.895059	0.100645					0.947059	0.105604
		0.749	0.0934																											1.42629	0.149828	1.42629	0.14955	1.42489	0.15
		0.864	0.108																											1.42862	0.15	1.43238	0.15	ConcBand	ConcBand
		1.054	0.1189																											IsoLine	IsoLine	ConcBand	ConcBand
		0.911	0.107
		0.817	0.0959
		0.81	0.1
		0.782	0.0947
		0.845	0.0991
		1.003	0.1144
		0.878	0.1034
		0.825	0.1012
		1.794	0.1725
		0.837	0.0996
		0.752	0.0921
		0.799	0.0995
		0.852	0.1022
		0.827	0.0972
		0.767	0.0951
		0.852	0.0999
		0.781	0.0939
		0.823	0.0967
		0.883	0.1059
		0.785	0.0958
		1.735	0.1707
		0.84	0.1032
		0.921	0.1091
		0.853	0.1003
		0.863	0.1031
		0.825	0.09833
		0.78	0.09467
		0.826	0.0988
		1.005	0.1078
		0.94	0.1088
		0.9	0.1059
		0.822	0.0916
		0.781	0.0947
		0.805	0.0975
		0.787	0.0957
		0.853	0.0971
		0.863	0.1065
		1.63	0.1673
		1.782	0.1744
		0.788	0.0926
		0.981	0.1111
		0.984	0.1074
		1.831	0.1789
		0.718	0.0886
		1.767	0.1756
		0.76	0.0921
		1.2	0.1311
		0.971	0.1086
		6.25	0.3747
		2.407	0.2093
		0.793	0.0954
		1.21	0.136
		6.11	0.3676
		6.432	0.3739
		10.13	0.4634
		6.794	0.3799
		0.84	0.1027
		0.946	0.1045
		9.33	0.4407
		5.46	0.3356
		7.24	0.391
		0.875	0.1001
		8.51	0.4205
		8.734	0.4272
		3.355	0.254
		0.799	0.0951
		0.774	0.0919
		0.838	0.0978
		2.287	0.199
		0.886	0.1017
		6.02	0.351
		1.932	0.177
		1.137	0.1218
		5.52	0.3256
		0.941	0.1046
		10.81	0.4457
		1.166	0.1221
		3.95	0.2686
		14.13	0.4917
		IsoLine	IsoLine
				10.9446	0.450039	1.21006	0.124533	4.09686	0.276354	14.4115	0.496839
				10.9417	0.450805	1.20825	0.124957	4.09362	0.27688	14.4076	0.497715
				10.9329	0.451348	1.20301	0.12515	4.0841	0.277044	14.3962	0.498427
				10.9188	0.451644	1.19478	0.125096	4.06871	0.276839	14.3775	0.498955
				10.9	0.45168	1.18421	0.124799	4.04814	0.276274	14.3521	0.499286
				10.8772	0.451455	1.17217	0.124283	4.02328	0.275374	14.3206	0.49941
				10.8515	0.450978	1.15963	0.123591	3.99522	0.274177	14.2839	0.499323
				10.8239	0.450271	1.1476	0.122778	3.96518	0.272737	14.243	0.499028
				10.7958	0.449364	1.13707	0.12191	3.93447	0.271116	14.199	0.498534
				10.7683	0.448296	1.12888	0.121057	3.90445	0.269385	14.1531	0.497853
				10.7426	0.447116	1.1237	0.120289	3.87641	0.267619	14.1067	0.497004
				10.7198	0.445873	1.12194	0.119667	3.8516	0.265897	14.0608	0.496011
				10.701	0.444623	1.12375	0.119243	3.83108	0.264293	14.0168	0.4949
				10.687	0.44342	1.12899	0.11905	3.81576	0.262877	13.976	0.493702
				10.6783	0.442317	1.13722	0.119104	3.80631	0.261711	13.9393	0.492449
				10.6754	0.441361	1.14779	0.119401	3.80314	0.260846	13.9078	0.491175
				10.6783	0.440595	1.15983	0.119917	3.80638	0.26032	13.8824	0.489916
				10.6871	0.440052	1.17237	0.120609	3.8159	0.260156	13.8637	0.488706
				10.7012	0.439756	1.1844	0.121422	3.83129	0.260361	13.8523	0.487577
				10.72	0.43972	1.19493	0.12229	3.85186	0.260926	13.8485	0.486561
				10.7428	0.439945	1.20312	0.123143	3.87672	0.261826	13.8524	0.485685
				10.7685	0.440422	1.2083	0.123911	3.90478	0.263023	13.8638	0.484973
				10.7961	0.441129	1.21006	0.124533	3.93482	0.264463	13.8825	0.484445
				10.8242	0.442036			3.96553	0.266084	13.9079	0.484114
				10.8517	0.443104			3.99555	0.267815	13.9394	0.48399
				10.8774	0.444284			4.02359	0.269581	13.9761	0.484077
				10.9002	0.445527			4.0484	0.271303	14.017	0.484372
				10.919	0.446777			4.06892	0.272907	14.061	0.484866
				10.933	0.44798			4.08424	0.274323	14.1069	0.485547
				10.9417	0.449083			4.09369	0.275489	14.1533	0.486396
				10.9446	0.450039			4.09686	0.276354	14.1992	0.487389
										14.2432	0.4885
										14.284	0.489698
										14.3207	0.490951
										14.3522	0.492225
										14.3776	0.493484
										14.3963	0.494694
										14.4077	0.495823
										14.4115	0.496839
[truncated: 206 more columns]

## Sheet: Table 1- sample Ama-1
	U	Th	Th/U	207Pb/235U	2sigma err	206Pb/238U	2sigma err	Rho	206Pb/238Uage	2sigma err	207Pb/206Pbage	2sigma err	%Conc.
AMA-01-1	34.29	30.39	0.886264	0.85	0.039	0.0972	0.0018	0.21724	598	11	690	100	95.8333
AMA-01-2	344	181.6	0.527907	10.13	0.1	0.4634	0.0049	0.70085	2454	21	2438	15	100.282
AMA-01-3	183	227	1.24044	0.55	0.017	0.0712	0.0012	0.38671	443.6	7.1	444	66	99.6854
AMA-01-4	168	64	0.380952	1.137	0.04	0.1218	0.003	0.73075	743	17	866	48	96.3684
AMA-01-5	431	101.2	0.234803	0.838	0.019	0.0978	0.0022	0.75577	602	13	665	33	97.5689
AMA-01-6	157.6	46.9	0.297589	6.02	0.12	0.351	0.0048	0.63884	1939	23	2019	26	98.0283
AMA-01-7	191.7	73.2	0.381847	5.52	0.11	0.3256	0.0057	0.89743	1821	29	1990	18	95.7917
AMA-01-8	49.1	63.2	1.28717	0.865	0.038	0.1066	0.0015	0.36355	652.7	8.9	591	84	103.768
AMA-01-9	169.7	46.1	0.271656	0.781	0.015	0.0947	0.0012	0.332	583.3	6.9	587	40	99.4205
AMA-01-10	68.24	59.97	0.87881	0.911	0.028	0.107	0.0021	0.19903	655	12	712	72	99.5441
AMA-01-11	77.7	75	0.965251	0.875	0.035	0.1047	0.0014	0.19059	641.7	7.9	632	85	100.58
AMA-01-12	70.8	46.2	0.652542	0.785	0.032	0.0958	0.0016	0.10295	589.5	9.2	600	94	99.9153
AMA-01-13	177.9	92.2	0.518269	0.825	0.02	0.1012	0.0011	0.27756	622.4	6	567	54	101.699
AMA-01-14	39.29	17.12	0.435734	0.919	0.038	0.1091	0.0019	0.12505	669	11	667	90	101.057
AMA-01-15	96.1	35.53	0.369719	6.25	0.1	0.3747	0.0041	0.54941	2051	19	1982	24	102.04
AMA-01-16	322	58.9	0.182919	0.805	0.014	0.0975	0.001	0.28356	599.9	6.1	609	40	100.117
AMA-01-17	287.8	29.89	0.103857	0.787	0.014	0.0957	0.001	0.30509	588.9	6	605	40	100.017
AMA-01-18	72.7	30.4	0.418157	0.8	0.032	0.0959	0.0022	0.26989	590	13	600	94	99.3266
AMA-01-19	103.5	71.2	0.687923	0.788	0.024	0.0926	0.0015	0.28561	570.7	8.9	654	67	96.893
AMA-01-20	235.1	93.9	0.399405	2.053	0.067	0.173	0.0039	0.82411	1028	21	1342	30	90.5727
AMA-01-21	132.6	106.9	0.806184	0.849	0.022	0.1027	0.0016	0.18342	630.3	9.2	587	61	101.172
AMA-01-22	154.7	37.7	0.243697	0.749	0.02	0.0934	0.0012	0.29095	575.7	7.3	548	58	101
AMA-01-23	47.8	66	1.38075	1.735	0.056	0.1707	0.0034	0.16162	1016	18	1012	73	99.5103
AMA-01-24	112.6	124.6	1.10657	0.882	0.025	0.1037	0.0011	0.13577	636.3	6.6	657	61	98.958
AMA-01-25	187.1	361	1.92945	0.762	0.019	0.095	0.0012	0.16617	585	7.2	536	58	101.916
AMA-01-26	185.3	9.03	0.0487318	0.863	0.019	0.1031	0.0012	0.16059	632.4	7.1	625	56	100.222
AMA-01-27	117.9	97.4	0.826124	1.054	0.03	0.1189	0.0017	0.2699	724.1	9.9	723	64	99.0561
AMA-01-28	77.5	52	0.670968	0.81	0.032	0.0968	0.0017	0.14029	596	10	590	78	98.0263
AMA-01-29	385.9	69.7	0.180617	10.81	0.11	0.4457	0.0049	0.72283	2376	22	2595	13	94.7331
AMA-01-30	294.8	241	0.817503	0.825	0.016	0.09833	0.00097	0.36789	604.6	5.7	606	40	99.0336
AMA-01-31	408.9	628	1.53583	0.883	0.018	0.1059	0.0015	0.4698	648.8	8.6	577	37	101.091
AMA-01-32	78.82	49.41	0.626871	0.941	0.037	0.1046	0.0018	0.085721	641	10	782	78	95.5291
AMA-01-33	129.9	48.94	0.376751	1.003	0.026	0.1144	0.0014	0.095031	698	8.3	739	61	98.5876
AMA-01-34	68.4	37.8	0.552632	14.13	0.23	0.4917	0.0063	0.66621	2582	28	2863	21	93.6525
AMA-01-35	84	44.9	0.534524	0.813	0.032	0.1023	0.0018	0.030659	628	11	462	93	104.493
AMA-01-36	410	363	0.885366	0.78	0.013	0.09467	0.00099	0.2454	583.1	5.8	583	36	99.4712
AMA-01-37	56.6	50.49	0.892049	0.812	0.035	0.0954	0.0021	0.22033	587	12	612	89	97.6705
AMA-01-38	164.2	79.4	0.483557	3.355	0.049	0.254	0.0034	0.3927	1459	18	1521	30	97.6573
AMA-01-39	303.8	177	0.58262	8.734	0.098	0.4272	0.0044	0.67612	2293	20	2319	15	99.2211
AMA-01-40	42	25.77	0.613571	0.981	0.046	0.1111	0.0024	0.10443	679	14	700	130	98.4058
AMA-01-41	97.3	62.8	0.645427	0.798	0.024	0.0955	0.0015	0.23392	587.6	8.6	657	64	98.9226
AMA-01-42	85.4	63.3	0.741218	1.767	0.04	0.1756	0.0022	0.28989	1043	12	1015	42	101.066
AMA-01-43	175.5	92.3	0.525926	0.767	0.022	0.0951	0.0015	0.14881	585.5	8.6	586	60	100.775
AMA-01-44	130.1	111.7	0.85857	0.835	0.024	0.0992	0.0012	0.29078	609.9	7.1	637	61	99.1707
AMA-01-45	55.6	34.77	0.62536	0.817	0.033	0.0959	0.0017	0.079036	590	10	710	95	96.7213
AMA-01-46	98.2	68.9	0.701629	0.781	0.024	0.0939	0.0014	0.0768	578.3	8.4	611	66	98.8547
AMA-01-47	449	222.5	0.495546	0.84	0.015	0.1032	0.0014	0.46025	632.8	7.9	574	36	102.262
AMA-01-48	6.23	2.07	0.332263	0.75	0.13	0.104	0.0045	0.10857	637	26	270	310	111.754
AMA-01-49	213	123	0.577465	0.853	0.017	0.1019	0.0017	0.27003	626	10	639	49	99.5389
AMA-01-50	101.8	83.7	0.8222	0.751	0.024	0.0923	0.0015	0.020301	568.8	8.7	573	80	100.317
AMA-01-51	139.3	114.4	0.821249	1.831	0.042	0.1789	0.0028	0.43754	1061	15	1032	48	100.569
AMA-01-52	75.7	32.6	0.430647	0.903	0.036	0.1049	0.002	0.28679	643	12	654	84	98.4686
AMA-01-53	328	126.9	0.38689	0.774	0.018	0.0919	0.0013	0.52854	566.5	7.9	668	45	97.1698
AMA-01-54	66.6	90.5	1.35886	0.799	0.031	0.0951	0.0017	0.062718	586	10	652	82	98.3221
AMA-01-55	43.87	72.2	1.64577	0.718	0.039	0.0886	0.0015	0.18386	547.2	9.1	570	110	100.22
AMA-01-56	49.11	40.86	0.83201	0.833	0.042	0.0997	0.0018	0.15028	613	11	600	120	99.3517
AMA-01-57	49	44.1	0.9	9.33	0.17	0.4407	0.0074	0.52548	2352	33	2372	29	99.0316
AMA-01-58	158.1	65.4	0.413662	0.852	0.019	0.0999	0.0015	0.2735	613.8	9	622	50	98.0511
AMA-01-59	93	84	0.903226	1.782	0.05	0.1744	0.0022	0.37909	1036	12	1013	49	99.7113
AMA-01-60	71	43.5	0.612676	0.882	0.03	0.1077	0.002	0.027076	659	12	576	70	102.648
AMA-01-61	163.7	95.7	0.584606	0.875	0.022	0.1001	0.0017	0.29277	614.6	9.8	706	48	96.4835
AMA-01-62	180.7	53.79	0.297676	3.95	0.12	0.2686	0.0069	0.91775	1532	35	1729	22	94.3931
AMA-01-63	241.4	105.6	0.437448	0.823	0.019	0.0967	0.0012	0.44887	594.7	7.2	629	48	97.6519
AMA-01-64	118.2	79.2	0.670051	0.971	0.031	0.1086	0.0016	0.51584	664.4	9.4	772	55	96.4296
AMA-01-65	253	62.1	0.245455	1.166	0.036	0.1221	0.0025	0.79364	743	14	880	43	94.8914
AMA-01-66	104.1	50.9	0.488953	0.822	0.024	0.0916	0.0013	0.048519	565.1	7.5	706	67	92.9441
AMA-01-67	353.2	70.72	0.200227	0.51	0.014	0.0673	0.00089	0.29575	419.8	5.3	404	59	100.407
AMA-01-68	88.2	24.1	0.273243	21.03	0.27	0.5528	0.0065	0.39217	2836	27	3279	20	90.3472
AMA-01-69	250	157.4	0.6296	0.826	0.016	0.0988	0.0013	0.37911	607.2	7.5	613	42	99.1509
AMA-01-70	71.2	47.55	0.667837	0.82	0.024	0.0961	0.002	0.22273	591	12	644	76	97.0443
AMA-01-71	70.1	40.7	0.580599	0.984	0.042	0.1074	0.0023	0.41772	657	14	770	74	93.7233
AMA-01-72	165.7	234	1.41219	0.759	0.022	0.0859	0.0018	0.28425	531	11	639	68	92.8322
AMA-01-73	91.1	110.9	1.21734	1.071	0.035	0.1183	0.0017	0.08609	722.2	9.5	821	68	97.7267
AMA-01-74	49.34	43.74	0.886502	0.84	0.037	0.1027	0.002	0.12755	632	11	550	110	102.597
AMA-01-75	148	63.9	0.431757	0.81	0.023	0.1	0.0019	0.32184	614	11	591	60	102.163
AMA-01-76	85.9	54.7	0.636787	6.432	0.097	0.3739	0.0055	0.42606	2050	27	2036	29	100.737
AMA-01-77	77.7	83.6	1.07593	0.799	0.03	0.0995	0.0016	0.20284	611.6	9.6	557	84	102.104
AMA-01-78	45.79	26.99	0.58943	6.11	0.13	0.3676	0.0054	0.43277	2017	25	1987	33	101.255
AMA-01-79	89.9	85.6	0.952169	1.63	0.036	0.1673	0.003	0.23005	997	16	946	50	101.735
AMA-01-80	77.4	81	1.04651	8.51	0.26	0.4205	0.0069	0.49388	2261	32	2313	38	99.1232
AMA-01-81	47.2	7.36	0.155932	5.46	0.12	0.3356	0.0068	0.63717	1864	33	1875	33	98.2086
AMA-01-82	25.4	15.57	0.612992	0.695	0.047	0.0902	0.0024	0.061851	556	14	470	140	103.346
AMA-01-83	210.1	90	0.428367	0.852	0.019	0.1022	0.0014	0.14483	627.1	8.4	604	52	100.176
AMA-01-84	78	43.6	0.558974	1.08	0.038	0.1254	0.0021	0.28073	761	12	702	71	102.285
AMA-01-85	102	87.8	0.860784	0.946	0.029	0.1045	0.0015	0.13537	640.9	8.5	743	66	95.089
AMA-01-86	55.6	28.74	0.516906	1.037	0.044	0.1209	0.0021	0.20381	735	12	671	89	101.379
AMA-01-87	330	536	1.62424	0.886	0.018	0.1017	0.0014	0.42045	624.3	8	709	39	97.0012
AMA-01-88	224	91.2	0.407143	0.921	0.019	0.1091	0.0014	0.28811	667.4	8	645	46	100.816
AMA-01-89	119.6	118.8	0.993311	0.853	0.024	0.0971	0.0016	0.043525	597.2	9.3	697	61	95.2472
AMA-01-90	77.3	42.6	0.5511	0.863	0.034	0.1065	0.0019	0.12723	652	11	507	99	103.657
AMA-01-91	78.4	46.3	0.590561	0.878	0.036	0.1034	0.0021	0.29581	636	12	602	85	99.5305
AMA-01-92	60.3	35.9	0.595357	1.794	0.063	0.1725	0.0029	0.33519	1025	16	1050	66	97.9924
AMA-01-93	42.99	32.35	0.752501	1.005	0.043	0.1078	0.0023	0.23099	660	13	799	91	93.0889
AMA-01-94	90.1	45.23	0.501998	2.407	0.056	0.2093	0.0034	0.014637	1225	18	1239	48	98.3936
AMA-01-95	169.8	97.1	0.571849	1.932	0.041	0.177	0.003	0.40355	1050	16	1151	43	96.242
AMA-01-96	106.3	93.1	0.875823	0.827	0.033	0.0972	0.0015	0.06504	597.6	8.5	653	84	97.6471
AMA-01-97	116.3	57.5	0.494411	7.24	0.1	0.391	0.0049	0.51759	2127	23	2143	21	99.3461
AMA-01-98	4.09	1.04	0.254279	1.21	0.44	0.136	0.017	0.030443	820	96	150	580	115.493
AMA-01-99	54.3	27.81	0.512155	0.91	0.056	0.0946	0.0025	0.31509	582	15	810	130	89.5385
AMA-01-100	178.1	312.8	1.75632	0.94	0.025	0.1088	0.0016	0.28434	665.9	9.2	681	56	98.7982
AMA-01-101	181.7	148.3	0.816181	0.788	0.023	0.0968	0.0014	0.1117	595.3	8.5	580	70	101.07
AMA-01-102	43.7	41.4	0.947368	0.837	0.041	0.0996	0.0024	0.15156	612	14	660	120	99.8369
AMA-01-103	429	208	0.484848	6.794	0.078	0.3799	0.0054	0.45779	2078	26	2083	23	99.6404
AMA-01-104	223.1	111.3	0.498879	0.782	0.019	0.0947	0.0016	0.10774	583.1	9.3	604	65	99.5051
AMA-01-105	124.7	101.1	0.810746	0.495	0.02	0.068	0.0013	0.078442	423.8	7.5	289	91	104.128
AMA-01-106	97.9	52	0.531154	0.531	0.03	0.0654	0.0013	0.076344	408	8.1	500	130	94.4444
AMA-01-107	217.4	363.7	1.67295	0.779	0.02	0.0946	0.0017	0.19397	582.7	9.9	587	66	99.7774
AMA-01-108	274	144.4	0.527007	0.752	0.017	0.0921	0.0017	0.4266	568.1	9.9	557	51	99.6492
AMA-01-109	10.48	4.54	0.433206	0.84	0.14	0.0809	0.0039	0.058364	501	23	760	320	85.7877
AMA-01-110	16.08	6.64	0.412935	0.793	0.077	0.0931	0.0033	0.15508	573	20	690	190	93.4747
AMA-01-111	134.7	19.68	0.146102	0.845	0.025	0.0991	0.0016	0.26342	609	9.5	630	66	98.0676
AMA-01-112	91.2	79.2	0.868421	0.76	0.037	0.0921	0.0017	0.2908	568	10	578	98	99.6491
AMA-01-113	47	47.9	1.01915	0.864	0.043	0.108	0.0021	0.20426	661	12	550	110	104.754
AMA-01-114	90.7	87.7	0.966924	0.864	0.027	0.1028	0.0018	0.22432	631	10	646	70	100
AMA-01-115	54	23.96	0.443704	0.851	0.036	0.1005	0.0023	0.051416	617	14	670	100	98.72
AMA-01-116	260	38.7	0.148846	0.9	0.018	0.1059	0.0015	0.3662	648.7	8.8	666	48	99.6314
AMA-01-117	165	78.6	0.476364	1.2	0.032	0.1311	0.0024	0.33975	794	14	821	58	99.3742
AMA-01-118	124.6	71.2	0.571429	0.853	0.025	0.1003	0.0018	0.29535	616	11	702	66	98.56
AMA-01-119	510	23	0.045098	0.793	0.015	0.0954	0.0014	0.4553	587.5	8.4	630	34	99.1729
AMA-01-120	140.8	53.7	0.381392	2.287	0.043	0.199	0.003	0.32537	1170	16	1279	43	96.9345

## Sheet: PlotDat3
Source sheet	Sheet2	0	0	375	0	0	0
Plot name	ProbDens2	1.5	0	450	0	2998.5	0
Plot Type	16	3	0	450	3
1st free col	9	4.5	0	375	3
Sigma Level	2	6	0	375	0
Absolute Errs	TRUE	7.5	0	ErrBox	ErrBox
Symbol Type	1	9	0	525	0
Inverse Plot	FALSE	10.5	0	600	0
Color Plot	TRUE	12	0	600	33
3D plot	FALSE	13.5	0	525	33
Linear	FALSE	15	0	525	0
Data Range	B:C	16.5	0	ErrBox	ErrBox
Filled Symbols	TRUE	18	0	600	0
ConcAge	FALSE	19.5	0	675	0
ConcSwap	FALSE	21	0	675	42
1st Symbol-row	1	22.5	0	600	42
		24	0	600	0
		25.5	0	ErrBox	ErrBox
		27	0	675	0
		28.5	0	750	0
		30	0	750	7
		31.5	0	675	7
		33	0	675	0
		34.5	0	ErrBox	ErrBox
		36	0	750	0
		37.5	0	825	0
		39	0	825	3
		40.5	0	750	3
		42	0	750	0
		43.5	0	ErrBox	ErrBox
		45	0	975	0
		46.5	0	1050	0
		48	0	1050	5
		49.5	0	975	5
		51	0	975	0
		52.5	0	ErrBox	ErrBox
		54	0	1050	0
		55.5	0	1125	0
		57	0	1125	1
		58.5	0	1050	1
		60	0	1050	0
		61.5	0	ErrBox	ErrBox
		63	0	1125	0
		64.5	0	1200	0
		66	0	1200	1
		67.5	0	1125	1
		69	0	1125	0
		70.5	0	ErrBox	ErrBox
		72	0	1200	0
		73.5	0	1275	0
		75	0	1275	1
		76.5	0	1200	1
		78	0	1200	0
		79.5	0	ErrBox	ErrBox
		81	0	1275	0
		82.5	0	1350	0
		84	0	1350	1
		85.5	0	1275	1
		87	0	1275	0
		88.5	0	ErrBox	ErrBox
		90	0	1500	0
		91.5	0	1575	0
		93	0	1575	1
		94.5	0	1500	1
		96	0	1500	0
		97.5	0	ErrBox	ErrBox
		99	0	1725	0
		100.5	0	1800	0
		102	0	1800	1
		103.5	0	1725	1
		105	0	1725	0
		106.5	0	ErrBox	ErrBox
		108	0	1875	0
		109.5	0	1950	0
		111	0	1950	1
		112.5	0	1875	1
		114	0	1875	0
		115.5	0	ErrBox	ErrBox
		117	0	1950	0
		118.5	0	2025	0
		120	0	2025	4
		121.5	0	1950	4
		123	0	1950	0
		124.5	0	ErrBox	ErrBox
		126	0	2025	0
		127.5	0	2100	0
		129	0	2100	2
		130.5	0	2025	2
		132	0	2025	0
		133.5	0	ErrBox	ErrBox
		135	0	2100	0
		136.5	0	2175	0
		138	0	2175	1
		139.5	0	2100	1
		141	0	2100	0
		142.5	0	ErrBox	ErrBox
		144	0	2250	0
		145.5	0	2325	0
		147	0	2325	2
		148.5	0	2250	2
		150	0	2250	0
		151.5	0	ErrBox	ErrBox
		153	0	2325	0
		154.5	0	2400	0
		156	0	2400	1
		157.5	0	2325	1
		159	0	2325	0
		160.5	0	ErrBox	ErrBox
		162	0	2400	0
		163.5	0	2475	0
		165	0	2475	1
		166.5	0	2400	1
		168	0	2400	0
		169.5	0	ErrBox	ErrBox
		171	0	2550	0
		172.5	0	2625	0
		174	0	2625	1
		175.5	0	2550	1
		177	0	2550	0
		178.5	0	ErrBox	ErrBox
		180	0	2850	0
		181.5	0	2925	0
		183	0	2925	1
		184.5	0	2850	1
		186	0	2850	0
		187.5	0	ErrBox	ErrBox
		189	0
		190.5	0
		192	0
		193.5	0
		195	0
		196.5	0
		198	0
		199.5	0
		201	0
		202.5	0
		204	0
		205.5	0
		207	0
		208.5	0
		210	0
		211.5	0
		213	0
		214.5	0
		216	0
		217.5	0
		219	0
		220.5	0
		222	0
		223.5	0
		225	0
		226.5	0
		228	0
		229.5	0
		231	0
		232.5	0
		234	0
		235.5	0
		237	0
		238.5	0
		240	0
		241.5	0
		243	0
		244.5	0
		246	0
		247.5	0
		249	0
		250.5	0
		252	0
		253.5	0
		255	0
		256.5	0
		258	0
		259.5	0
		261	0
		262.5	0
		264	0
		265.5	0
		267	0
		268.5	0
		270	0
		271.5	0
		273	0
		274.5	0
		276	0
		277.5	0
		279	0
		280.5	0
		282	0
		283.5	0
		285	0
		286.5	0
		288	0
		289.5	0
		291	0
		292.5	0
		294	0
		295.5	0
		297	0
		298.5	0
		300	0
		301.5	0
		303	0
		304.5	0
		306	0
		307.5	0
		309	0
		310.5	0
		312	0
		313.5	0
		315	0
		316.5	0
		318	0
		319.5	0
		321	0
		322.5	0
		324	0
		325.5	0
		327	0
		328.5	0
		330	0
		331.5	0
		333	0
		334.5	0
		336	0
		337.5	0
		339	0
		340.5	0
		342	0
		343.5	0
		345	0
		346.5	0
		348	0
		349.5	0
		351	0
		352.5	0
		354	0
		355.5	0
		357	0
		358.5	0
		360	0
		361.5	0
		363	0
		364.5	0
		366	0
		367.5	0
		369	0
		370.5	0
		372	0
		373.5	0
		375	0
		376.5	0
		378	0
		379.5	0
		381	0
		382.5	0
		384	0
		385.5	0
		387	0
		388.5	0
		390	0
		391.5	0
		393	0
		394.5	0
		396	0
		397.5	0
		399	0
		400.5	0
		402	0
		403.5	0
		405	0
		406.5	2.25056e-08
		408	1.97438e-07
		409.5	1.35328e-06
		411	8.14928e-06
		412.5	4.00236e-05
		414	0.000152405
		415.5	0.000438435
		417	0.000944242
		418.5	0.00152799
		420	0.00189188
		421.5	0.00186452
		423	0.00156289
		424.5	0.00120159
		426	0.000878909
		427.5	0.000598226
		429	0.000363394
		430.5	0.000192305
		432	9.10098e-05
		433.5	5.0557e-05
		435	6.3758e-05
		436.5	0.000137633
		438	0.000287312
		439.5	0.000510605
		441	0.000760573
		442.5	0.000947885
		444	0.000988207
		445.5	0.000861792
		447	0.000628666
		448.5	0.000383619
		450	0.000195814
		451.5	8.36084e-05
		453	2.9862e-05
		454.5	8.92175e-06
		456	2.22969e-06
		457.5	4.66124e-07
		459	8.15121e-08
		460.5	1.19235e-08
		462	0
		463.5	0
		465	0
		466.5	0
		468	0
		469.5	0
		471	0
		472.5	0
		474	0
		475.5	0
		477	0
		478.5	0
		480	0
		481.5	0
		483	0
		484.5	0
		486	0
		487.5	0
		489	0
		490.5	0
		492	0
		493.5	0
		495	0
		496.5	0
		498	0
		499.5	0
		501	0
		502.5	0
		504	0
		505.5	1.37944e-08
		507	4.70652e-08
		508.5	1.49071e-07
		510	4.38315e-07
		511.5	1.1964e-06
		513	3.03153e-06
		514.5	7.13091e-06
		516	1.55713e-05
		517.5	3.15648e-05
		519	5.93988e-05
		520.5	0.000103765
		522	0.000168274
		523.5	0.000253339
		525	0.000354064
		526.5	0.000459406
		528	0.000553452
		529.5	0.000619262
		531	0.000644133
		532.5	0.000624471
		534	0.000568331
		535.5	0.00049468
		537	0.000429596
		538.5	0.000400202
		540	0.000427137
		541.5	0.000516811
		543	0.00065606
		544.5	0.000813056
		546	0.000946849
		547.5	0.00102297
		549	0.00102756
		550.5	0.000971781
		552	0.00088518
		553.5	0.000804571
		555	0.000768141
		556.5	0.000819009
		558	0.00101089
		559.5	0.00140004
		561	0.00201243
		562.5	0.00279986
		564	0.00362208
		565.5	0.00428823
		567	0.00464566
		568.5	0.00465875
		570	0.0044216
		571.5	0.00409932
		573	0.00384514
		574.5	0.00375783
		576	0.0039094
		577.5	0.00440056
		579	0.00534378
		580.5	0.00672497
		582	0.00827631
		583.5	0.00957689
		585	0.0103382
		586.5	0.0105437
		588	0.01032
		589.5	0.00980254
		591	0.00914898
		592.5	0.00853828
		594	0.0080695
		595.5	0.00770661
		597	0.00734367
		598.5	0.00690586
		600	0.00642337
		601.5	0.00603869
		603	0.00589493
		604.5	0.00599962
		606	0.00624753
		607.5	0.00654149
		609	0.00680819
		610.5	0.00694488
		612	0.00684885
		613.5	0.00649833
		615	0.00597967
		616.5	0.00545749
		618	0.0051171
		619.5	0.00507224
		621	0.00527705
		622.5	0.00555467
		624	0.00575888
		625.5	0.00589348
		627	0.0060534
		628.5	0.00628563
		630	0.00653555
		631.5	0.00669711
		633	0.00668596
		634.5	0.00647906
		636	0.00611653
		637.5	0.0056814
		639	0.00526514
		640.5	0.00492809
		642	0.00468459
		643.5	0.00452756
		645	0.00445776
		646.5	0.004478
		648	0.00456444
		649.5	0.00465909
		651	0.00469764
		652.5	0.0046468
		654	0.00451997
		655.5	0.0043655
		657	0.00424195
		658.5	0.00419474
		660	0.00424026
		661.5	0.00435619
		663	0.00447964
		664.5	0.0045189
		666	0.00438391
		667.5	0.00402739
		669	0.00347391
		670.5	0.00281412
		672	0.00216414
		673.5	0.00161612
		675	0.0012101
		676.5	0.000937345
		678	0.000762607
		679.5	0.00064684
		681	0.000559974
		682.5	0.000484239
		684	0.000412557
		685.5	0.000346115
		687	0.000292697
		688.5	0.000265731
		690	0.000281752
		691.5	0.000354099
		693	0.00048222
		694.5	0.000641999
		696	0.000786485
		697.5	0.000862745
		699	0.000837954
		700.5	0.000717399
		702	0.000540615
		703.5	0.000358909
		705	0.000211277
		706.5	0.000113626
		708	6.38188e-05
		709.5	5.3822e-05
		711	8.00665e-05
		712.5	0.000147282
		714	0.000265994
		715.5	0.000444963
		717	0.000681479
		718.5	0.000953766
		720	0.00122099
		721.5	0.00143379
		723	0.00155239
		724.5	0.00156359
		726	0.00148677
		727.5	0.00136529
		729	0.00124805
		730.5	0.00117103
		732	0.00114755
		733.5	0.00116946
		735	0.00121584
		736.5	0.00126336
		738	0.00129368
		739.5	0.00129644
		741	0.00126874
		742.5	0.00121294
		744	0.00113462
		745.5	0.00104125
		747	0.000941658
		748.5	0.000845546
		750	0.000762659
		751.5	0.000701199
		753	0.000665904
		754.5	0.000656332
		756	0.000666203
		757.5	0.000684344
		759	0.00069725
		760.5	0.000692603
		762	0.000662606
		763.5	0.000605906
		765	0.000527601
		766.5	0.000437198
		768	0.000345698
		769.5	0.000262717
		771	0.000194684
		772.5	0.000144413
		774	0.00011182
		775.5	9.52247e-05
		777	9.26133e-05
		778.5	0.000102502
		780	0.000124174
		781.5	0.000157452
		783	0.000202084
		784.5	0.000257036
		786	0.000319823
		787.5	0.000386237
		789	0.000450509
		790.5	0.000505984
		792	0.000546226
		793.5	0.000566223
		795	0.000563456
		796.5	0.000538437
		798	0.000494599
		799.5	0.000437548
		801	0.000373915
		802.5	0.00031012
		804	0.00025137
		805.5	0.000201086
		807	0.000160811
		808.5	0.00013049
		810	0.000108977
		811.5	9.4567e-05
		813	8.54482e-05
		814.5	7.99944e-05
		816	7.69095e-05
		817.5	7.52524e-05
		819	7.43926e-05
		820.5	7.39372e-05
		822	7.36569e-05
		823.5	7.34264e-05
		825	7.31814e-05
		826.5	7.28908e-05
		828	7.25371e-05
		829.5	7.2125e-05
		831	7.16453e-05
		832.5	7.10993e-05
		834	7.04886e-05
		835.5	6.9815e-05
		837	6.90803e-05
		838.5	6.82866e-05
		840	6.74361e-05
		841.5	6.65312e-05
		843	6.55744e-05
		844.5	6.45683e-05
		846	6.35156e-05
		847.5	6.2419e-05
		849	6.12815e-05
		850.5	6.0106e-05
		852	5.88955e-05
		853.5	5.7653e-05
		855	5.6391e-05
		856.5	5.50956e-05
		858	5.37779e-05
		859.5	5.2441e-05
		861	5.1088e-05
		862.5	4.9722e-05
		864	4.83461e-05
		865.5	4.69634e-05
		867	4.55767e-05
		868.5	4.41892e-05
		870	4.28035e-05
		871.5	4.14226e-05
		873	4.00492e-05
		874.5	3.86859e-05
		876	3.73353e-05
		877.5	3.59998e-05
		879	3.46819e-05
		880.5	3.33838e-05
		882	3.21078e-05
		883.5	3.0856e-05
		885	2.96305e-05
		886.5	2.84331e-05
		888	2.72659e-05
		889.5	2.61305e-05
		891	2.50287e-05
		892.5	2.39622e-05
		894	2.29325e-05
		895.5	2.19413e-05
		897	2.099e-05
		898.5	2.00802e-05
		900	1.92131e-05
		901.5	1.83903e-05
		903	1.76132e-05
		904.5	1.68831e-05
		906	1.62117e-05
		907.5	1.55925e-05
		909	1.50179e-05
		910.5	1.44974e-05
		912	1.40329e-05
		913.5	1.36263e-05
		915	1.32796e-05
		916.5	1.29949e-05
		918	1.27747e-05
		919.5	1.26214e-05
		921	1.25379e-05
		922.5	1.25372e-05
		924	1.2606e-05
		925.5	1.27554e-05
		927	1.30001e-05
		928.5	1.33273e-05
		930	1.37503e-05
		931.5	1.42752e-05
		933	1.49087e-05
		934.5	1.56584e-05
		936	1.65328e-05
		937.5	1.75413e-05
		939	1.86946e-05
		940.5	2.00045e-05
		942	2.14843e-05
		943.5	2.31486e-05
		945	2.50137e-05
		946.5	2.70979e-05
		948	2.94208e-05
		949.5	3.20045e-05
		951	3.48729e-05
		952.5	3.80519e-05
		954	4.15698e-05
		955.5	4.54567e-05
		957	4.9745e-05
		958.5	5.44687e-05
		960	5.96738e-05
		961.5	6.53909e-05
		963	7.1671e-05
		964.5	7.85697e-05
		966	8.61581e-05
		967.5	9.45322e-05
		969	0.00010383
		970.5	0.000114251
		972	0.00012609
		973.5	0.000139766
		975	0.000155855
		976.5	0.000175109
		978	0.000198452
		979.5	0.000226922
		981	0.000261573
		982.5	0.000303295
		984	0.000352592
		985.5	0.000409338
		987	0.000472551
		988.5	0.000540267
		990	0.000609559
		991.5	0.000676743
		993	0.000737772
		994.5	0.00078876
		996	0.000826552
		997.5	0.000849208
		999	0.00085631
		1000.5	0.000849011
		1002	0.00082981
		1003.5	0.000802126
		1005	0.000769739
		1006.5	0.000736251
		1008	0.000704638
		1009.5	0.000676984
		1011	0.000654403
		1012.5	0.000637128
		1014	0.000624706
		1015.5	0.00061625
		1017	0.000610671
		1018.5	0.00060687
		1020	0.000603867
		1021.5	0.000600869
		1023	0.000597287
		1024.5	0.000592714
		1026	0.000586929
		1027.5	0.000579803
		1029	0.00057131
		1030.5	0.000561482
		1032	0.000550396
		1033.5	0.000538151
		1035	0.000524859
		1036.5	0.00051066
		1038	0.000495672
		1039.5	0.000480027
		1041	0.000463854
		1042.5	0.000447277
		1044	0.000430417
		1045.5	0.000413385
		1047	0.000396287
		1048.5	0.000379219
		1050	0.000362271
		1051.5	0.00034552
		1053	0.000329037
		1054.5	0.000312882
		1056	0.000297118
		1057.5	0.000281772
		1059	0.000266887
		1060.5	0.000252492
		1062	0.000238608
		1063.5	0.000225251
		1065	0.00021243
		1066.5	0.000200152
		1068	0.000188416
		1069.5	0.00017722
		1071	0.000166558
		1072.5	0.000156423
		1074	0.000146804
		1075.5	0.00013769
		1077	0.00012907
		1078.5	0.000120931
		1080	0.000113261
		1081.5	0.000106049
		1083	9.92833e-05
		1084.5	9.29543e-05
		1086	8.70534e-05
		1087.5	8.15737e-05
		1089	7.651e-05
		1090.5	7.1859e-05
		1092	6.76192e-05
		1093.5	6.3791e-05
		1095	6.03771e-05
		1096.5	5.73816e-05
		1098	5.48106e-05
		1099.5	5.26716e-05
		1101	5.09734e-05
		1102.5	4.97256e-05
		1104	4.89381e-05
		1105.5	4.86211e-05
		1107	4.8784e-05
		1108.5	4.94268e-05
		1110	5.05749e-05
		1111.5	5.2221e-05
		1113	5.43661e-05
		1114.5	5.70071e-05
		1116	6.01362e-05
		1117.5	6.37408e-05
		1119	6.78019e-05
		1120.5	7.22945e-05
		1122	7.71798e-05
		1123.5	8.24353e-05
		1125	8.80061e-05
		1126.5	9.38399e-05
		1128	9.98778e-05
		1129.5	0.000106055
		1131	0.000112301
		1132.5	0.000118541
		1134	0.000124707
		1135.5	0.000130702
		1137	0.000136452
		1138.5	0.00014187
		1140	0.000146895
		1141.5	0.000151443
		1143	0.000155446
		1144.5	0.000158842
		1146	0.000161577
		1147.5	0.000163608
		1149	0.000164902
		1150.5	0.000165436
		1152	0.0001652
		1153.5	0.000164195
		1155	0.000162435
		1156.5	0.000159946
		1158	0.000156764
		1159.5	0.000152936
		1161	0.000148518
		1162.5	0.000143576
		1164	0.00013818
		1165.5	0.000132406
		1167	0.000126336
		1168.5	0.000120051
		1170	0.000113628
		1171.5	0.000107166
		1173	0.000100737
		1174.5	9.44194e-05
		1176	8.82855e-05
		1177.5	8.24042e-05
		1179	7.68383e-05
		1180.5	7.16442e-05
		1182	6.68716e-05
		1183.5	6.25634e-05
		1185	5.87672e-05
		1186.5	5.5493e-05
		1188	5.27721e-05
		1189.5	5.0621e-05
		1191	4.90498e-05
		1192.5	4.80634e-05
		1194	4.76532e-05
		1195.5	4.78306e-05
		1197	4.85759e-05
		1198.5	4.98746e-05
		1200	5.17083e-05
		1201.5	5.40549e-05
		1203	5.68888e-05
		1204.5	6.01816e-05
		1206	6.39016e-05
		1207.5	6.80148e-05
		1209	7.24846e-05
		1210.5	7.72724e-05
		1212	8.23378e-05
		1213.5	8.76391e-05
		1215	9.31335e-05
		1216.5	9.87774e-05
		1218	0.000104528
		1219.5	0.000110341
		1221	0.000116175
		1222.5	0.00012199
		1224	0.000127747
		1225.5	0.000133411
		1227	0.000138949
		1228.5	0.000144334
		1230	0.000149539
		1231.5	0.000154546
		1233	0.00015934
		1234.5	0.000163909
		1236	0.000168248
		1237.5	0.000172355
		1239	0.000176233
		1240.5	0.000179888
		1242	0.00018333
		1243.5	0.000186568
		1245	0.000189616
		1246.5	0.000192478
		1248	0.000195185
		1249.5	0.000197737
		1251	0.000200142
		1252.5	0.000202404
		1254	0.000204524
		1255.5	0.0002065
		1257	0.000208321
		1258.5	0.000209974
		1260	0.00021144
		1261.5	0.000212696
		1263	0.000213713
		1264.5	0.000214459
		1266	0.0002149
		1267.5	0.000215
		1269	0.000214722
		1270.5	0.00021403
		1272	0.00021289
		1273.5	0.000211271
		1275	0.000209148
		1276.5	0.0002065
		1278	0.000203315
		1279.5	0.000199585
		1281	0.000195312
		1282.5	0.000190508
		1284	0.000185191
		1285.5	0.000179388
		1287	0.000173133
		1288.5	0.00016647
		1290	0.000159447
		1291.5	0.000152118
		1293	0.000144541
		1294.5	0.000136778
		1296	0.000128891
		1297.5	0.000120943
		1299	0.000112998
		1300.5	0.000105115
		1302	9.73515e-05
		1303.5	8.97609e-05
		1305	8.23911e-05
		1306.5	7.52846e-05
		1308	6.8478e-05
		1309.5	6.20016e-05
		1311	5.58791e-05
		1312.5	5.0128e-05
		1314	4.47596e-05
		1315.5	3.97796e-05
		1317	3.51878e-05
		1318.5	3.09798e-05
		1320	2.71463e-05
		1321.5	2.36746e-05
		1323	2.0549e-05
		1324.5	1.77513e-05
		1326	1.52615e-05
		1327.5	1.30583e-05
		1329	1.11198e-05
		1330.5	9.4238e-06
		1332	7.94819e-06
		1333.5	6.67148e-06
		1335	5.57295e-06
		1336.5	4.63294e-06
		1338	3.83295e-06
		1339.5	3.15583e-06
		1341	2.58581e-06
		1342.5	2.10854e-06
		1344	1.71106e-06
		1345.5	1.37402e-06
		1347	1.10463e-06
		1348.5	8.8375e-07
		1350	7.03602e-07
		1351.5	5.57456e-07
		1353	4.39522e-07
		1354.5	3.44855e-07
		1356	2.69264e-07
		1357.5	2.09222e-07
		1359	1.61779e-07
		1360.5	1.24486e-07
		1362	9.53252e-08
		1363.5	7.26407e-08
		1365	5.50857e-08
		1366.5	4.15703e-08
		1368	3.12186e-08
		1369.5	2.33309e-08
		1371	1.73514e-08
		1372.5	1.28417e-08
		1374	9.45796e-09
		1375.5	0
		1377	0
		1378.5	0
		1380	0
		1381.5	0
		1383	0
		1384.5	0
		1386	0
		1387.5	0
		1389	0
		1390.5	0
		1392	0
		1393.5	0
		1395	0
		1396.5	0
		1398	0
		1399.5	0
		1401	0
		1402.5	0
		1404	0
		1405.5	0
		1407	0
		1408.5	0
		1410	0
		1411.5	0
		1413	0
		1414.5	0
		1416	0
		1417.5	0
		1419	0
		1420.5	0
		1422	0
		1423.5	0
		1425	0
		1426.5	0
		1428	0
		1429.5	0
		1431	0
		1432.5	0
		1434	0
		1435.5	0
		1437	0
		1438.5	0
		1440	0
		1441.5	0
		1443	0
		1444.5	0
		1446	0
		1447.5	0
		1449	0
		1450.5	0
		1452	0
		1453.5	9.42997e-09
		1455	1.47154e-08
		1456.5	2.27347e-08
		1458	3.47748e-08
		1459.5	5.26619e-08
		1461	7.89561e-08
		1462.5	1.17201e-07
		1464	1.72241e-07
		1465.5	2.50609e-07
		1467	3.61005e-07
		1468.5	5.14859e-07
		1470	7.26975e-07
		1471.5	1.01627e-06
		1473	1.40655e-06
		1474.5	1.92733e-06
		1476	2.61467e-06
		1477.5	3.51183e-06
		1479	4.6699e-06
		1480.5	6.14806e-06
		1482	8.01358e-06
		1483.5	1.03412e-05
		1485	1.32122e-05
		1486.5	1.67122e-05
		1488	2.0929e-05
		1489.5	2.59491e-05
		1491	3.18532e-05
		1492.5	3.87115e-05
		1494	4.65784e-05
		1495.5	5.54864e-05
		1497	6.54402e-05
		1498.5	7.64118e-05
		1500	8.83351e-05
		1501.5	0.000101103
		1503	0.000114564
		1504.5	0.000128527
		1506	0.000142756
		1507.5	0.000156983
		1509	0.00017091
		1510.5	0.000184221
		1512	0.000196593
		1513.5	0.000207709
		1515	0.000217269
		1516.5	0.000225008
		1518	0.000230704
		1519.5	0.000234191
		1521	0.000235365
		1522.5	0.000234191
		1524	0.000230704
		1525.5	0.000225008
		1527	0.000217269
		1528.5	0.000207709
		1530	0.000196593
		1531.5	0.000184221
		1533	0.00017091
		1534.5	0.000156983
		1536	0.000142756
		1537.5	0.000128527
		1539	0.000114564
		1540.5	0.000101103
		1542	8.83351e-05
		1543.5	7.64118e-05
		1545	6.54402e-05
		1546.5	5.54864e-05
		1548	4.65784e-05
		1549.5	3.87115e-05
		1551	3.18532e-05
		1552.5	2.59491e-05
		1554	2.0929e-05
		1555.5	1.67122e-05
		1557	1.32122e-05
		1558.5	1.03412e-05
		1560	8.01358e-06
		1561.5	6.14806e-06
		1563	4.6699e-06
		1564.5	3.51183e-06
		1566	2.61467e-06
		1567.5	1.92733e-06
		1569	1.40655e-06
		1570.5	1.01627e-06
		1572	7.26975e-07
		1573.5	5.14859e-07
		1575	3.61005e-07
		1576.5	2.50609e-07
		1578	1.72241e-07
		1579.5	1.17201e-07
		1581	7.89561e-08
		1582.5	5.26619e-08
		1584	3.47748e-08
		1585.5	2.27347e-08
		1587	1.47154e-08
		1588.5	9.42997e-09
		1590	0
		1591.5	0
		1593	0
		1594.5	0
		1596	0
		1597.5	0
		1599	0
		1600.5	0
		1602	0
		1603.5	0
		1605	0
		1606.5	0
		1608	0
		1609.5	0
		1611	0
		1612.5	0
		1614	0
		1615.5	0
		1617	0
		1618.5	0
		1620	0
		1621.5	0
		1623	0
		1624.5	0
		1626	0
		1627.5	0
		1629	0
		1630.5	0
		1632	0
		1633.5	0
		1635	0
		1636.5	0
		1638	0
		1639.5	0
		1641	0
		1642.5	0
		1644	0
		1645.5	0
		1647	0
		1648.5	0
		1650	0
		1651.5	0
		1653	0
		1654.5	0
		1656	0
		1657.5	0
		1659	0
		1660.5	0
		1662	0
		1663.5	0
		1665	0
		1666.5	0
		1668	0
		1669.5	0
		1671	0
		1672.5	0
		1674	0
		1675.5	0
		1677	0
		1678.5	0
		1680	1.57613e-08
		1681.5	2.86657e-08
		1683	5.11747e-08
		1684.5	8.96754e-08
		1686	1.54246e-07
		1687.5	2.60424e-07
		1689	4.3159e-07
		1690.5	7.0208e-07
		1692	1.12105e-06
		1693.5	1.75707e-06
		1695	2.70319e-06
		1696.5	4.08215e-06
		1698	6.05096e-06
		1699.5	8.8041e-06
		1701	1.25739e-05
		1702.5	1.7627e-05
		1704	2.42556e-05
		1705.5	3.27619e-05
		1707	4.34362e-05
		1708.5	5.65272e-05
		1710	7.22084e-05
		1711.5	9.05404e-05
		1713	0.000111435
		1714.5	0.000134625
		1716	0.000159644
		1717.5	0.000185825
		1719	0.000212315
		1720.5	0.000238111
		1722	0.000262123
		1723.5	0.000283239
		1725	0.000300418
		1726.5	0.000312769
		1728	0.000319629
		1729.5	0.000320621
		1731	0.000315691
		1732.5	0.00030511
		1734	0.000289451
		1735.5	0.000269537
		1737	0.000246369
		1738.5	0.000221043
		1740	0.000194667
		1741.5	0.00016828
		1743	0.00014279
		1744.5	0.000118929
		1746	9.72298e-05
		1747.5	7.80255e-05
		1749	6.14608e-05
		1750.5	4.75208e-05
		1752	3.60657e-05
		1753.5	2.68676e-05
		1755	1.96466e-05
		1756.5	1.41017e-05
		1758	9.93522e-06
		1759.5	6.87082e-06
		1761	4.66406e-06
		1762.5	3.10774e-06
		1764	2.03259e-06
		1765.5	1.3049e-06
		1767	8.223e-07
		1768.5	5.08636e-07
		1770	3.08822e-07
		1771.5	1.84049e-07
		1773	1.07667e-07
		1774.5	6.18242e-08
		1776	3.48463e-08
		1777.5	1.92788e-08
		1779	1.04695e-08
		1780.5	0
		1782	0
		1783.5	0
		1785	0
		1786.5	0
		1788	0
		1789.5	0
		1791	0
		1792.5	0
		1794	0
		1795.5	0
		1797	0
		1798.5	0
		1800	0
		1801.5	1.05076e-08
		1803	1.56884e-08
		1804.5	2.32309e-08
		1806	3.41165e-08
		1807.5	4.96905e-08
		1809	7.17783e-08
		1810.5	1.02831e-07
		1812	1.46105e-07
		1813.5	2.05882e-07
		1815	2.87727e-07
		1816.5	3.98799e-07
		1818	5.482e-07
		1819.5	7.47368e-07
		1821	1.01051e-06
		1822.5	1.35506e-06
		1824	1.80213e-06
		1825.5	2.37697e-06
		1827	3.10938e-06
		1828.5	4.03398e-06
		1830	5.19044e-06
		1831.5	6.62348e-06
		1833	8.3826e-06
		1834.5	1.05216e-05
		1836	1.30977e-05
		1837.5	1.61704e-05
		1839	1.97996e-05
		1840.5	2.40438e-05
		1842	2.89574e-05
		1843.5	3.45882e-05
		1845	4.09739e-05
		1846.5	4.81389e-05
		1848	5.60915e-05
		1849.5	6.48199e-05
		1851	7.429e-05
		1852.5	8.44428e-05
		1854	9.51933e-05
		1855.5	0.000106429
		1857	0.000118012
		1858.5	0.000129778
		1860	0.000141543
		1861.5	0.000153104
		1863	0.000164246
		1864.5	0.000174748
		1866	0.000184393
		1867.5	0.000192967
		1869	0.000200279
		1870.5	0.000206157
		1872	0.000210461
		1873.5	0.000213086
		1875	0.000213968
		1876.5	0.000213086
		1878	0.000210461
		1879.5	0.000206157
		1881	0.000200279
		1882.5	0.000192967
		1884	0.000184393
		1885.5	0.000174748
		1887	0.000164246
		1888.5	0.000153104
		1890	0.000141543
		1891.5	0.000129778
		1893	0.000118012
		1894.5	0.000106429
		1896	9.51933e-05
		1897.5	8.44428e-05
		1899	7.429e-05
		1900.5	6.48199e-05
		1902	5.60915e-05
		1903.5	4.81389e-05
		1905	4.09739e-05
		1906.5	3.45882e-05
		1908	2.89574e-05
		1909.5	2.40438e-05
		1911	1.97996e-05
		1912.5	1.61704e-05
		1914	1.31097e-05
		1915.5	1.05395e-05
		1917	8.40903e-06
		1918.5	6.66218e-06
		1920	5.24666e-06
		1921.5	4.11497e-06
		1923	3.22509e-06
		1924.5	2.54092e-06
		1926	2.03252e-06
		1927.5	1.68592e-06
		1929	1.47143e-06
		1930.5	1.38524e-06
		1932	1.42536e-06
		1933.5	1.59762e-06
		1935	1.91652e-06
		1936.5	2.40627e-06
		1938	3.10228e-06
		1939.5	4.05296e-06
		1941	5.32191e-06
		1942.5	6.99044e-06
		1944	9.16016e-06
		1945.5	1.19556e-05
		1947	1.55266e-05
		1948.5	2.00588e-05
		1950	2.57397e-05
		1951.5	3.28225e-05
		1953	4.1554e-05
		1954.5	5.22104e-05
		1956	6.50799e-05
		1957.5	8.0454e-05
		1959	9.86177e-05
		1960.5	0.00011985
		1962	0.000144379
		1963.5	0.000172422
		1965	0.000204152
		1966.5	0.000239694
		1968	0.000279123
		1969.5	0.000322436
		1971	0.000369547
		1972.5	0.000420194
		1974	0.000473941
		1975.5	0.000530076
		1977	0.000587553
		1978.5	0.000644949
		1980	0.000700456
		1981.5	0.000751932
		1983	0.000797022
		1984.5	0.000833345
		1986	0.000858734
		1987.5	0.000871496
		1989	0.000870658
		1990.5	0.000856139
		1992	0.000828831
		1993.5	0.000790557
		1995	0.000743904
		1996.5	0.000691972
		1998	0.000638053
		1999.5	0.000585313
		2001	0.000536509
		2002.5	0.000493779
		2004	0.000458531
		2005.5	0.000431424
		2007	0.000412432
		2008.5	0.000400965
		2010	0.000396024
		2011.5	0.000396356
		2013	0.0004006
		2014.5	0.000407403
		2016	0.000415507
		2017.5	0.000423808
		2019	0.000431381
		2020.5	0.000437495
		2022	0.000441608
		2023.5	0.00044335
		2025	0.000442505
		2026.5	0.000438987
		2028	0.000432815
		2029.5	0.000424093
		2031	0.000412997
		2032.5	0.000399715
		2034	0.000384506
		2035.5	0.000367617
		2037	0.000349307
		2038.5	0.000329869
		2040	0.000309566
		2041.5	0.000288683
		2043	0.000267506
		2044.5	0.00024633
		2046	0.000225461
		2047.5	0.000205213
		2049	0.00018591
		2050.5	0.000167889
		2052	0.00015149
		2053.5	0.000137061
		2055	0.000124944
		2056.5	0.000115473
		2058	0.000108956
		2059.5	0.000105664
		2061	0.000105808
		2062.5	0.000109516
		2064	0.000116828
		2065.5	0.000127637
		2067	0.000141695
		2068.5	0.000158592
		2070	0.000177752
		2071.5	0.00019844
		2073	0.000219785
		2074.5	0.000240818
		2076	0.00026052
		2077.5	0.000277884
		2079	0.000291975
		2080.5	0.000302023
		2082	0.000307428
		2083.5	0.000307846
		2085	0.000303197
		2086.5	0.000293669
		2088	0.000279702
		2089.5	0.000261945
		2091	0.000241202
		2092.5	0.000218371
		2094	0.000194376
		2095.5	0.000170118
		2097	0.000146381
		2098.5	0.000123847
		2100	0.000103038
		2101.5	8.43196e-05
		2103	6.79012e-05
		2104.5	5.38792e-05
		2106	4.22241e-05
		2107.5	3.28442e-05
		2109	2.56105e-05
		2110.5	2.03903e-05
		2112	1.7076e-05
		2113.5	1.56096e-05
		2115	1.59989e-05
		2116.5	1.83258e-05
		2118	2.27443e-05
		2119.5	2.94687e-05
		2121	3.8749e-05
		2122.5	5.08366e-05
		2124	6.594e-05
		2125.5	8.41733e-05
		2127	0.000105503
		2128.5	0.000129702
		2130	0.000156309
		2131.5	0.000184614
		2133	0.000213665
		2134.5	0.000242307
		2136	0.000269236
		2137.5	0.000293132
		2139	0.000312702
		2140.5	0.000326839
		2142	0.000334714
		2143.5	0.000335855
		2145	0.000330191
		2146.5	0.000318065
		2148	0.000300195
		2149.5	0.000277606
		2151	0.00025153
		2152.5	0.0002233
		2154	0.000194233
		2155.5	0.000165537
		2157	0.000138231
		2158.5	0.000113097
		2160	9.06635e-05
		2161.5	7.12118e-05
		2163	5.48035e-05
		2164.5	4.13239e-05
		2166	3.05303e-05
		2167.5	2.21003e-05
		2169	1.56748e-05
		2170.5	1.08929e-05
		2172	7.41684e-06
		2173.5	4.94804e-06
		2175	3.23433e-06
		2176.5	2.07144e-06
		2178	1.29986e-06
		2179.5	7.99205e-07
		2181	4.81456e-07
		2182.5	2.84179e-07
		2184	1.64348e-07
		2185.5	9.31264e-08
		2187	5.17033e-08
		2188.5	2.81256e-08
		2190	1.49907e-08
		2191.5	0
		2193	0
		2194.5	0
		2196	0
		2197.5	0
		2199	0
		2200.5	0
		2202	0
		2203.5	0
		2205	0
		2206.5	0
		2208	0
		2209.5	0
		2211	0
		2212.5	0
		2214	0
		2215.5	0
		2217	0
		2218.5	0
		2220	0
		2221.5	0
		2223	0
		2224.5	0
		2226	0
		2227.5	0
		2229	1.05873e-08
		2230.5	1.49628e-08
		2232	2.10152e-08
		2233.5	2.93325e-08
		2235	4.06871e-08
		2236.5	5.60865e-08
		2238	7.68338e-08
		2239.5	1.04602e-07
		2241	1.41521e-07
		2242.5	1.90281e-07
		2244	2.54251e-07
		2245.5	3.37616e-07
		2247	4.45529e-07
		2248.5	5.84282e-07
		2250	7.61488e-07
		2251.5	9.8627e-07
		2253	1.26947e-06
		2254.5	1.62383e-06
		2256	2.06421e-06
		2257.5	2.60771e-06
		2259	3.27385e-06
		2260.5	4.08462e-06
		2262	5.0645e-06
		2263.5	6.24044e-06
		2265	7.64164e-06
		2266.5	9.29933e-06
		2268	1.12463e-05
		2269.5	1.35164e-05
		2271	1.61438e-05
		2272.5	1.91621e-05
		2274	2.26034e-05
		2275.5	2.64971e-05
		2277	3.08684e-05
		2278.5	3.57376e-05
		2280	4.11177e-05
		2281.5	4.70138e-05
		2283	5.34214e-05
		2284.5	6.03371e-05
		2286	6.77272e-05
		2287.5	7.5569e-05
		2289	8.38349e-05
		2290.5	9.25086e-05
		2292	0.000101603
		2293.5	0.000111191
		2295	0.000121441
		2296.5	0.000132673
		2298	0.000145402
		2299.5	0.000160389
		2301	0.000178641
		2302.5	0.000201359
		2304	0.000229801
		2305.5	0.000265044
		2307	0.000307668
		2308.5	0.000357362
		2310	0.000412667
		2311.5	0.000470789
		2313	0.000527696
		2314.5	0.000578517
		2316	0.000618191
		2317.5	0.000642292
		2319	0.000647812
		2320.5	0.00063374
		2322	0.000601271
		2323.5	0.000553593
		2325	0.00049531
		2326.5	0.000431646
		2328	0.000367629
		2329.5	0.000307432
		2331	0.000253979
		2332.5	0.000208851
		2334	0.000172442
		2335.5	0.000144267
		2337	0.000123323
		2338.5	0.000108408
		2340	9.83618e-05
		2341.5	9.22045e-05
		2343	8.9186e-05
		2344.5	8.87771e-05
		2346	9.0625e-05
		2347.5	9.4497e-05
		2349	0.000100227
		2350.5	0.000107672
		2352	0.000116679
		2353.5	0.000127066
		2355	0.000138601
		2356.5	0.000151026
		2358	0.000164015
		2359.5	0.000177214
		2361	0.000190239
		2362.5	0.000202691
		2364	0.00021417
		2365.5	0.000224291
		2367	0.000232701
		2368.5	0.000239098
		2370	0.00024324
		2371.5	0.00024496
		2373	0.000244172
		2374.5	0.000240875
		2376	0.000235152
		2377.5	0.000227165
		2379	0.000217145
		2380.5	0.000205381
		2382	0.000192203
		2383.5	0.000177968
		2385	0.000163041
		2386.5	0.000147783
		2388	0.000132531
		2389.5	0.000117591
		2391	0.000103227
		2392.5	8.96542e-05
		2394	7.70382e-05
		2395.5	6.54934e-05
		2397	5.50865e-05
		2398.5	4.58329e-05
		2400	3.77351e-05
		2401.5	3.07374e-05
		2403	2.47708e-05
		2404.5	1.97718e-05
		2406	1.56316e-05
		2407.5	1.2279e-05
		2409	9.65441e-06
		2410.5	7.73786e-06
		2412	6.57622e-06
		2413.5	6.32006e-06
		2415	7.26976e-06
		2416.5	9.9263e-06
		2418	1.50354e-05
		2419.5	2.36055e-05
		2421	3.68743e-05
		2422.5	5.6196e-05
		2424	8.28317e-05
		2425.5	0.000117647
		2427	0.000160753
		2428.5	0.000211166
		2430	0.000266587
		2431.5	0.000323402
		2433	0.000376966
		2434.5	0.000422187
		2436	0.000454301
		2437.5	0.000469694
		2439	0.000466564
		2440.5	0.000445291
		2442	0.000408324
		2443.5	0.000359745
		2445	0.000304518
		2446.5	0.000247661
		2448	0.000193523
		2449.5	0.00014529
		2451	0.000104801
		2452.5	7.26313e-05
		2454	4.83627e-05
		2455.5	3.09404e-05
		2457	1.90182e-05
		2458.5	1.12316e-05
		2460	6.37295e-06
		2461.5	3.47431e-06
		2463	1.8198e-06
		2464.5	9.15818e-07
		2466	4.42814e-07
		2467.5	2.05713e-07
		2469	9.18188e-08
		2470.5	3.93758e-08
		2472	1.62239e-08
		2473.5	0
		2475	0
		2476.5	0
		2478	0
		2479.5	0
		2481	0
		2482.5	0
		2484	0
		2485.5	0
		2487	0
		2488.5	0
		2490	0
		2491.5	0
		2493	0
		2494.5	0
		2496	0
		2497.5	0
		2499	0
		2500.5	0
		2502	0
		2503.5	0
		2505	0
		2506.5	0
		2508	0
		2509.5	0
		2511	0
		2512.5	0
		2514	0
		2515.5	0
		2517	0
		2518.5	0
		2520	0
		2521.5	0
		2523	0
		2524.5	0
		2526	0
		2527.5	0
		2529	0
		2530.5	0
		2532	0
		2533.5	0
		2535	0
		2536.5	0
		2538	0
		2539.5	0
		2541	0
		2542.5	0
		2544	0
		2545.5	0
		2547	0
		2548.5	0
		2550	0
		2551.5	0
		2553	0
		2554.5	0
		2556	0
		2557.5	0
		2559	0
		2560.5	0
		2562	0
		2563.5	0
		2565	1.28617e-08
		2566.5	3.63326e-08
		2568	9.73119e-08
		2569.5	2.4712e-07
		2571	5.95007e-07
		2572.5	1.35834e-06
		2574	2.94012e-06
		2575.5	6.03385e-06
		2577	1.17408e-05
		2578.5	2.16605e-05
		2580	3.78891e-05
		2581.5	6.28393e-05
		2583	9.88144e-05
		2584.5	0.000147327
		2586	0.000208264
		2587.5	0.000279138
		2589	0.000354727
		2590.5	0.000427409
		2592	0.000488274
		2593.5	0.000528878
		2595	0.00054315
		2596.5	0.000528878
		2598	0.000488274
		2599.5	0.000427409
		2601	0.000354727
		2602.5	0.000279138
		2604	0.000208264
		2605.5	0.000147327
		2607	9.88144e-05
		2608.5	6.28393e-05
		2610	3.78891e-05
		2611.5	2.16605e-05
		2613	1.17408e-05
		2614.5	6.03385e-06
		2616	2.94012e-06
		2617.5	1.35834e-06
		2619	5.95007e-07
		2620.5	2.4712e-07
		2622	9.73119e-08
		2623.5	3.63326e-08
		2625	1.28617e-08
		2626.5	0
		2628	0
		2629.5	0
		2631	0
		2632.5	0
		2634	0
		2635.5	0
		2637	0
		2638.5	0
		2640	0
		2641.5	0
		2643	0
		2644.5	0
		2646	0
		2647.5	0
		2649	0
		2650.5	0
		2652	0
		2653.5	0
		2655	0
		2656.5	0
		2658	0
		2659.5	0
		2661	0
		2662.5	0
		2664	0
		2665.5	0
		2667	0
		2668.5	0
		2670	0
		2671.5	0
		2673	0
		2674.5	0
		2676	0
		2677.5	0
		2679	0
		2680.5	0
		2682	0
		2683.5	0
		2685	0
		2686.5	0
		2688	0
		2689.5	0
		2691	0
		2692.5	0
		2694	0
		2695.5	0
		2697	0
		2698.5	0
		2700	0
		2701.5	0
		2703	0
		2704.5	0
		2706	0
		2707.5	0
		2709	0
		2710.5	0
		2712	0
		2713.5	0
		2715	0
		2716.5	0
		2718	0
		2719.5	0
		2721	0
		2722.5	0
		2724	0
		2725.5	0
		2727	0
		2728.5	0
		2730	0
		2731.5	0
		2733	0
		2734.5	0
		2736	0
		2737.5	0
		2739	0
		2740.5	0
		2742	0
		2743.5	0
		2745	0
		2746.5	0
		2748	0
		2749.5	0
		2751	0
		2752.5	0
		2754	0
		2755.5	0
		2757	0
		2758.5	0
		2760	0
		2761.5	0
		2763	0
		2764.5	0
		2766	0
		2767.5	0
		2769	0
		2770.5	0
		2772	0
		2773.5	0
		2775	0
		2776.5	0
		2778	0
		2779.5	0
		2781	0
		2782.5	0
		2784	0
		2785.5	0
		2787	0
		2788.5	0
		2790	0
		2791.5	0
		2793	0
		2794.5	0
		2796	0
		2797.5	0
		2799	0
		2800.5	0
		2802	0
		2803.5	0
		2805	0
		2806.5	0
		2808	0
		2809.5	0
		2811	0
		2812.5	0
		2814	0
		2815.5	1.20992e-08
		2817	2.28556e-08
		2818.5	4.23023e-08
		2820	7.67137e-08
		2821.5	1.36307e-07
		2823	2.37302e-07
		2824.5	4.04781e-07
		2826	6.76512e-07
		2827.5	1.10782e-06
		2829	1.77745e-06
		2830.5	2.79425e-06
		2832	4.30396e-06
		2833.5	6.49544e-06
		2835	9.60474e-06
		2836.5	1.39155e-05
		2838	1.97538e-05
		2839.5	2.7475e-05
		2841	3.74423e-05
		2842.5	4.99947e-05
		2844	6.54067e-05
		2845.5	8.38411e-05
		2847	0.0001053
		2848.5	0.00012958
		2850	0.000156237
		2851.5	0.000184572
		2853	0.000213641
		2854.5	0.000242293
		2856	0.000269236
		2857.5	0.000293132
		2859	0.000312702
		2860.5	0.000326839
		2862	0.000334714
		2863.5	0.000335855
		2865	0.000330191
		2866.5	0.000318065
		2868	0.000300195
		2869.5	0.000277606
		2871	0.00025153
		2872.5	0.0002233
		2874	0.000194233
		2875.5	0.000165537
		2877	0.000138231
		2878.5	0.000113097
		2880	9.06635e-05
		2881.5	7.12118e-05
		2883	5.48035e-05
		2884.5	4.13239e-05
		2886	3.05303e-05
		2887.5	2.21003e-05
		2889	1.56748e-05
		2890.5	1.08929e-05
		2892	7.41684e-06
		2893.5	4.94804e-06
		2895	3.23433e-06
		2896.5	2.07144e-06
		2898	1.29986e-06
		2899.5	7.99205e-07
		2901	4.81456e-07
		2902.5	2.84179e-07
		2904	1.64348e-07
		2905.5	9.31264e-08
		2907	5.17033e-08
		2908.5	2.81256e-08
		2910	1.49907e-08
		2911.5	0
		2913	0
		2914.5	0
		2916	0
		2917.5	0
		2919	0
		2920.5	0
		2922	0
		2923.5	0
		2925	0
		2926.5	0
		2928	0
		2929.5	0
		2931	0
		2932.5	0
		2934	0
		2935.5	0
		2937	0
		2938.5	0
		2940	0
		2941.5	0
		2943	0
		2944.5	0
		2946	0
		2947.5	0
		2949	0
		2950.5	0
		2952	0
		2953.5	0
		2955	0
		2956.5	0
		2958	0
		2959.5	0
		2961	0
		2962.5	0
		2964	0
		2965.5	0
		2967	0
		2968.5	0
		2970	0
		2971.5	0
		2973	0
		2974.5	0
		2976	0
		2977.5	0
		2979	0
		2980.5	0
		2982	0
		2983.5	0
		2985	0
		2986.5	0
		2988	0
		2989.5	0
		2991	0
		2992.5	0
		2994	0
		2995.5	0
		2997	0
		2998.5	0
[truncated: 1 more rows]

## Sheet: PlotDat2
Source sheet	Sheet2	0	0
Plot name	ProbDens1	1.5	0
Plot Type	16	3	0
1st free col	5	4.5	0
Sigma Level	2	6	0
Absolute Errs	TRUE	7.5	0
Symbol Type	1	9	0
Inverse Plot	FALSE	10.5	0
Color Plot	TRUE	12	0
3D plot	FALSE	13.5	0
Linear	FALSE	15	0
Data Range	B:C	16.5	0
Filled Symbols	TRUE	18	0
ConcAge	FALSE	19.5	0
ConcSwap	FALSE	21	0
1st Symbol-row	1	22.5	0
		24	0
		25.5	0
		27	0
		28.5	0
		30	0
		31.5	0
		33	0
		34.5	0
		36	0
		37.5	0
		39	0
		40.5	0
		42	0
		43.5	0
		45	0
		46.5	0
		48	0
		49.5	0
		51	0
		52.5	0
		54	0
		55.5	0
		57	0
		58.5	0
		60	0
		61.5	0
		63	0
		64.5	0
		66	0
		67.5	0
		69	0
		70.5	0
		72	0
		73.5	0
		75	0
		76.5	0
		78	0
		79.5	0
		81	0
		82.5	0
		84	0
		85.5	0
		87	0
		88.5	0
		90	0
		91.5	0
		93	0
		94.5	0
		96	0
		97.5	0
		99	0
		100.5	0
		102	0
		103.5	0
		105	0
		106.5	0
		108	0
		109.5	0
		111	0
		112.5	0
		114	0
		115.5	0
		117	0
		118.5	0
		120	0
		121.5	0
		123	0
		124.5	0
		126	0
		127.5	0
		129	0
		130.5	0
		132	0
		133.5	0
		135	0
		136.5	0
		138	0
		139.5	0
		141	0
		142.5	0
		144	0
		145.5	0
		147	0
		148.5	0
		150	0
		151.5	0
		153	0
		154.5	0
		156	0
		157.5	0
		159	0
		160.5	0
		162	0
		163.5	0
		165	0
		166.5	0
		168	0
		169.5	0
		171	0
		172.5	0
		174	0
		175.5	0
		177	0
		178.5	0
		180	0
		181.5	0
		183	0
		184.5	0
		186	0
		187.5	0
		189	0
		190.5	0
		192	0
		193.5	0
		195	0
		196.5	0
		198	0
		199.5	0
		201	0
		202.5	0
		204	0
		205.5	0
		207	0
		208.5	0
		210	0
		211.5	0
		213	0
		214.5	0
		216	0
		217.5	0
		219	0
		220.5	0
		222	0
		223.5	0
		225	0
		226.5	0
		228	0
		229.5	0
		231	0
		232.5	0
		234	0
		235.5	0
		237	0
		238.5	0
		240	0
		241.5	0
		243	0
		244.5	0
		246	0
		247.5	0
		249	0
		250.5	0
		252	0
		253.5	0
		255	0
		256.5	0
		258	0
		259.5	0
		261	0
		262.5	0
		264	0
		265.5	0
		267	0
		268.5	0
		270	0
		271.5	0
		273	0
		274.5	0
		276	0
		277.5	0
		279	0
		280.5	0
		282	0
		283.5	0
		285	0
		286.5	0
		288	0
		289.5	0
		291	0
		292.5	0
		294	0
		295.5	0
		297	0
		298.5	0
		300	0
		301.5	0
		303	0
		304.5	0
		306	0
		307.5	0
		309	0
		310.5	0
		312	0
		313.5	0
		315	0
		316.5	0
		318	0
		319.5	0
		321	0
		322.5	0
		324	0
		325.5	0
		327	0
		328.5	0
		330	0
		331.5	0
		333	0
		334.5	0
		336	0
		337.5	0
		339	0
		340.5	0
		342	0
		343.5	0
		345	0
		346.5	0
		348	0
		349.5	0
		351	0
		352.5	0
		354	0
		355.5	0
		357	0
		358.5	0
		360	0
		361.5	0
		363	0
		364.5	0
		366	0
		367.5	0
		369	0
		370.5	0
		372	0
		373.5	0
		375	0
		376.5	0
		378	0
		379.5	0
		381	0
		382.5	0
		384	0
		385.5	0
		387	0
		388.5	0
		390	0
		391.5	0
		393	0
		394.5	0
		396	0
		397.5	0
		399	0
		400.5	0
		402	0
		403.5	0
		405	0
		406.5	2.25056e-08
		408	1.97438e-07
		409.5	1.35328e-06
		411	8.14928e-06
		412.5	4.00236e-05
		414	0.000152405
		415.5	0.000438435
		417	0.000944242
		418.5	0.00152799
		420	0.00189188
		421.5	0.00186452
		423	0.00156289
		424.5	0.00120159
		426	0.000878909
		427.5	0.000598226
		429	0.000363394
		430.5	0.000192305
		432	9.10098e-05
		433.5	5.0557e-05
		435	6.3758e-05
		436.5	0.000137633
		438	0.000287312
		439.5	0.000510605
		441	0.000760573
		442.5	0.000947885
		444	0.000988207
		445.5	0.000861792
		447	0.000628666
		448.5	0.000383619
		450	0.000195814
		451.5	8.36084e-05
		453	2.9862e-05
		454.5	8.92175e-06
		456	2.22969e-06
		457.5	4.66124e-07
		459	8.15121e-08
		460.5	1.19235e-08
		462	0
		463.5	0
		465	0
		466.5	0
		468	0
		469.5	0
		471	0
		472.5	0
		474	0
		475.5	0
		477	0
		478.5	0
		480	0
		481.5	0
		483	0
		484.5	0
		486	0
		487.5	0
		489	0
		490.5	0
		492	0
		493.5	0
		495	0
		496.5	0
		498	0
		499.5	0
		501	0
		502.5	0
		504	0
		505.5	1.37944e-08
		507	4.70652e-08
		508.5	1.49071e-07
		510	4.38315e-07
		511.5	1.1964e-06
		513	3.03153e-06
		514.5	7.13091e-06
		516	1.55713e-05
		517.5	3.15648e-05
		519	5.93988e-05
		520.5	0.000103765
		522	0.000168274
		523.5	0.000253339
		525	0.000354064
		526.5	0.000459406
		528	0.000553452
		529.5	0.000619262
		531	0.000644133
		532.5	0.000624471
		534	0.000568331
		535.5	0.00049468
		537	0.000429596
		538.5	0.000400202
		540	0.000427137
		541.5	0.000516811
		543	0.00065606
		544.5	0.000813056
		546	0.000946849
		547.5	0.00102297
		549	0.00102756
		550.5	0.000971781
		552	0.00088518
		553.5	0.000804571
		555	0.000768141
		556.5	0.000819009
		558	0.00101089
		559.5	0.00140004
		561	0.00201243
		562.5	0.00279986
		564	0.00362208
		565.5	0.00428823
		567	0.00464566
		568.5	0.00465875
		570	0.0044216
		571.5	0.00409932
		573	0.00384514
		574.5	0.00375783
		576	0.0039094
		577.5	0.00440056
		579	0.00534378
		580.5	0.00672497
		582	0.00827631
		583.5	0.00957689
		585	0.0103382
		586.5	0.0105437
		588	0.01032
		589.5	0.00980254
		591	0.00914898
		592.5	0.00853828
		594	0.0080695
		595.5	0.00770661
		597	0.00734367
		598.5	0.00690586
		600	0.00642337
		601.5	0.00603869
		603	0.00589493
		604.5	0.00599962
		606	0.00624753
		607.5	0.00654149
		609	0.00680819
		610.5	0.00694488
		612	0.00684885
		613.5	0.00649833
		615	0.00597967
		616.5	0.00545749
		618	0.0051171
		619.5	0.00507224
		621	0.00527705
		622.5	0.00555467
		624	0.00575888
		625.5	0.00589348
		627	0.0060534
		628.5	0.00628563
		630	0.00653555
		631.5	0.00669711
		633	0.00668596
		634.5	0.00647906
		636	0.00611653
		637.5	0.0056814
		639	0.00526514
		640.5	0.00492809
		642	0.00468459
		643.5	0.00452756
		645	0.00445776
		646.5	0.004478
		648	0.00456444
		649.5	0.00465909
		651	0.00469764
		652.5	0.0046468
		654	0.00451997
		655.5	0.0043655
		657	0.00424195
		658.5	0.00419474
		660	0.00424026
		661.5	0.00435619
		663	0.00447964
		664.5	0.0045189
		666	0.00438391
		667.5	0.00402739
		669	0.00347391
		670.5	0.00281412
		672	0.00216414
		673.5	0.00161612
		675	0.0012101
		676.5	0.000937345
		678	0.000762607
		679.5	0.00064684
		681	0.000559974
		682.5	0.000484239
		684	0.000412557
		685.5	0.000346115
		687	0.000292697
		688.5	0.000265731
		690	0.000281752
		691.5	0.000354099
		693	0.00048222
		694.5	0.000641999
		696	0.000786485
		697.5	0.000862745
		699	0.000837954
		700.5	0.000717399
		702	0.000540615
		703.5	0.000358909
		705	0.000211277
		706.5	0.000113626
		708	6.38188e-05
		709.5	5.3822e-05
		711	8.00665e-05
		712.5	0.000147282
		714	0.000265994
		715.5	0.000444963
		717	0.000681479
		718.5	0.000953766
		720	0.00122099
		721.5	0.00143379
		723	0.00155239
		724.5	0.00156359
		726	0.00148677
		727.5	0.00136529
		729	0.00124805
		730.5	0.00117103
		732	0.00114755
		733.5	0.00116946
		735	0.00121584
		736.5	0.00126336
		738	0.00129368
		739.5	0.00129644
		741	0.00126874
		742.5	0.00121294
		744	0.00113462
		745.5	0.00104125
		747	0.000941658
		748.5	0.000845546
		750	0.000762659
		751.5	0.000701199
		753	0.000665904
		754.5	0.000656332
		756	0.000666203
		757.5	0.000684344
		759	0.00069725
		760.5	0.000692603
		762	0.000662606
		763.5	0.000605906
		765	0.000527601
		766.5	0.000437198
		768	0.000345698
		769.5	0.000262717
		771	0.000194684
		772.5	0.000144413
		774	0.00011182
		775.5	9.52247e-05
		777	9.26133e-05
		778.5	0.000102502
		780	0.000124174
		781.5	0.000157452
		783	0.000202084
		784.5	0.000257036
		786	0.000319823
		787.5	0.000386237
		789	0.000450509
		790.5	0.000505984
		792	0.000546226
		793.5	0.000566223
		795	0.000563456
		796.5	0.000538437
		798	0.000494599
		799.5	0.000437548
		801	0.000373915
		802.5	0.00031012
		804	0.00025137
		805.5	0.000201086
		807	0.000160811
		808.5	0.00013049
		810	0.000108977
		811.5	9.4567e-05
		813	8.54482e-05
		814.5	7.99944e-05
		816	7.69095e-05
		817.5	7.52524e-05
		819	7.43926e-05
		820.5	7.39372e-05
		822	7.36569e-05
		823.5	7.34264e-05
		825	7.31814e-05
		826.5	7.28908e-05
		828	7.25371e-05
		829.5	7.2125e-05
		831	7.16453e-05
		832.5	7.10993e-05
		834	7.04886e-05
		835.5	6.9815e-05
		837	6.90803e-05
		838.5	6.82866e-05
		840	6.74361e-05
		841.5	6.65312e-05
		843	6.55744e-05
		844.5	6.45683e-05
		846	6.35156e-05
		847.5	6.2419e-05
		849	6.12815e-05
		850.5	6.0106e-05
		852	5.88955e-05
		853.5	5.7653e-05
		855	5.6391e-05
		856.5	5.50956e-05
		858	5.37779e-05
		859.5	5.2441e-05
		861	5.1088e-05
		862.5	4.9722e-05
		864	4.83461e-05
		865.5	4.69634e-05
		867	4.55767e-05
		868.5	4.41892e-05
		870	4.28035e-05
		871.5	4.14226e-05
		873	4.00492e-05
		874.5	3.86859e-05
		876	3.73353e-05
		877.5	3.59998e-05
		879	3.46819e-05
		880.5	3.33838e-05
		882	3.21078e-05
		883.5	3.0856e-05
		885	2.96305e-05
		886.5	2.84331e-05
		888	2.72659e-05
		889.5	2.61305e-05
		891	2.50287e-05
		892.5	2.39622e-05
		894	2.29325e-05
		895.5	2.19413e-05
		897	2.099e-05
		898.5	2.00802e-05
		900	1.92131e-05
		901.5	1.83903e-05
		903	1.76132e-05
		904.5	1.68831e-05
		906	1.62117e-05
		907.5	1.55925e-05
		909	1.50179e-05
		910.5	1.44974e-05
		912	1.40329e-05
		913.5	1.36263e-05
		915	1.32796e-05
		916.5	1.29949e-05
		918	1.27747e-05
		919.5	1.26214e-05
		921	1.25379e-05
		922.5	1.25372e-05
		924	1.2606e-05
		925.5	1.27554e-05
		927	1.30001e-05
		928.5	1.33273e-05
		930	1.37503e-05
		931.5	1.42752e-05
		933	1.49087e-05
		934.5	1.56584e-05
		936	1.65328e-05
		937.5	1.75413e-05
		939	1.86946e-05
		940.5	2.00045e-05
		942	2.14843e-05
		943.5	2.31486e-05
		945	2.50137e-05
		946.5	2.70979e-05
		948	2.94208e-05
		949.5	3.20045e-05
		951	3.48729e-05
		952.5	3.80519e-05
		954	4.15698e-05
		955.5	4.54567e-05
		957	4.9745e-05
		958.5	5.44687e-05
		960	5.96738e-05
		961.5	6.53909e-05
		963	7.1671e-05
		964.5	7.85697e-05
		966	8.61581e-05
		967.5	9.45322e-05
		969	0.00010383
		970.5	0.000114251
		972	0.00012609
		973.5	0.000139766
		975	0.000155855
		976.5	0.000175109
		978	0.000198452
		979.5	0.000226922
		981	0.000261573
		982.5	0.000303295
		984	0.000352592
		985.5	0.000409338
		987	0.000472551
		988.5	0.000540267
		990	0.000609559
		991.5	0.000676743
		993	0.000737772
		994.5	0.00078876
		996	0.000826552
		997.5	0.000849208
		999	0.00085631
		1000.5	0.000849011
		1002	0.00082981
		1003.5	0.000802126
		1005	0.000769739
		1006.5	0.000736251
		1008	0.000704638
		1009.5	0.000676984
		1011	0.000654403
		1012.5	0.000637128
		1014	0.000624706
		1015.5	0.00061625
		1017	0.000610671
		1018.5	0.00060687
		1020	0.000603867
		1021.5	0.000600869
		1023	0.000597287
		1024.5	0.000592714
		1026	0.000586929
		1027.5	0.000579803
		1029	0.00057131
		1030.5	0.000561482
		1032	0.000550396
		1033.5	0.000538151
		1035	0.000524859
		1036.5	0.00051066
		1038	0.000495672
		1039.5	0.000480027
		1041	0.000463854
		1042.5	0.000447277
		1044	0.000430417
		1045.5	0.000413385
		1047	0.000396287
		1048.5	0.000379219
		1050	0.000362271
		1051.5	0.00034552
		1053	0.000329037
		1054.5	0.000312882
		1056	0.000297118
		1057.5	0.000281772
		1059	0.000266887
		1060.5	0.000252492
		1062	0.000238608
		1063.5	0.000225251
		1065	0.00021243
		1066.5	0.000200152
		1068	0.000188416
		1069.5	0.00017722
		1071	0.000166558
		1072.5	0.000156423
		1074	0.000146804
		1075.5	0.00013769
		1077	0.00012907
		1078.5	0.000120931
		1080	0.000113261
		1081.5	0.000106049
		1083	9.92833e-05
		1084.5	9.29543e-05
		1086	8.70534e-05
		1087.5	8.15737e-05
		1089	7.651e-05
		1090.5	7.1859e-05
		1092	6.76192e-05
		1093.5	6.3791e-05
		1095	6.03771e-05
		1096.5	5.73816e-05
		1098	5.48106e-05
		1099.5	5.26716e-05
		1101	5.09734e-05
		1102.5	4.97256e-05
		1104	4.89381e-05
		1105.5	4.86211e-05
		1107	4.8784e-05
		1108.5	4.94268e-05
		1110	5.05749e-05
		1111.5	5.2221e-05
		1113	5.43661e-05
		1114.5	5.70071e-05
		1116	6.01362e-05
		1117.5	6.37408e-05
		1119	6.78019e-05
		1120.5	7.22945e-05
		1122	7.71798e-05
		1123.5	8.24353e-05
		1125	8.80061e-05
		1126.5	9.38399e-05
		1128	9.98778e-05
		1129.5	0.000106055
		1131	0.000112301
		1132.5	0.000118541
		1134	0.000124707
		1135.5	0.000130702
		1137	0.000136452
		1138.5	0.00014187
		1140	0.000146895
		1141.5	0.000151443
		1143	0.000155446
		1144.5	0.000158842
		1146	0.000161577
		1147.5	0.000163608
		1149	0.000164902
		1150.5	0.000165436
		1152	0.0001652
		1153.5	0.000164195
		1155	0.000162435
		1156.5	0.000159946
		1158	0.000156764
		1159.5	0.000152936
		1161	0.000148518
		1162.5	0.000143576
		1164	0.00013818
		1165.5	0.000132406
		1167	0.000126336
		1168.5	0.000120051
		1170	0.000113628
		1171.5	0.000107166
		1173	0.000100737
		1174.5	9.44194e-05
		1176	8.82855e-05
		1177.5	8.24042e-05
		1179	7.68383e-05
		1180.5	7.16442e-05
		1182	6.68716e-05
		1183.5	6.25634e-05
		1185	5.87672e-05
		1186.5	5.5493e-05
		1188	5.27721e-05
		1189.5	5.0621e-05
		1191	4.90498e-05
		1192.5	4.80634e-05
		1194	4.76532e-05
		1195.5	4.78306e-05
		1197	4.85759e-05
		1198.5	4.98746e-05
		1200	5.17083e-05
		1201.5	5.40549e-05
		1203	5.68888e-05
		1204.5	6.01816e-05
		1206	6.39016e-05
		1207.5	6.80148e-05
		1209	7.24846e-05
		1210.5	7.72724e-05
		1212	8.23378e-05
		1213.5	8.76391e-05
		1215	9.31335e-05
		1216.5	9.87774e-05
		1218	0.000104528
		1219.5	0.000110341
		1221	0.000116175
		1222.5	0.00012199
		1224	0.000127747
		1225.5	0.000133411
		1227	0.000138949
		1228.5	0.000144334
		1230	0.000149539
		1231.5	0.000154546
		1233	0.00015934
		1234.5	0.000163909
		1236	0.000168248
		1237.5	0.000172355
		1239	0.000176233
		1240.5	0.000179888
		1242	0.00018333
		1243.5	0.000186568
		1245	0.000189616
		1246.5	0.000192478
		1248	0.000195185
		1249.5	0.000197737
		1251	0.000200142
		1252.5	0.000202404
		1254	0.000204524
		1255.5	0.0002065
		1257	0.000208321
		1258.5	0.000209974
		1260	0.00021144
		1261.5	0.000212696
		1263	0.000213713
		1264.5	0.000214459
		1266	0.0002149
		1267.5	0.000215
		1269	0.000214722
		1270.5	0.00021403
		1272	0.00021289
		1273.5	0.000211271
		1275	0.000209148
		1276.5	0.0002065
		1278	0.000203315
		1279.5	0.000199585
		1281	0.000195312
		1282.5	0.000190508
		1284	0.000185191
		1285.5	0.000179388
		1287	0.000173133
		1288.5	0.00016647
		1290	0.000159447
		1291.5	0.000152118
		1293	0.000144541
		1294.5	0.000136778
		1296	0.000128891
		1297.5	0.000120943
		1299	0.000112998
		1300.5	0.000105115
		1302	9.73515e-05
		1303.5	8.97609e-05
		1305	8.23911e-05
		1306.5	7.52846e-05
		1308	6.8478e-05
		1309.5	6.20016e-05
		1311	5.58791e-05
		1312.5	5.0128e-05
		1314	4.47596e-05
		1315.5	3.97796e-05
		1317	3.51878e-05
		1318.5	3.09798e-05
		1320	2.71463e-05
		1321.5	2.36746e-05
		1323	2.0549e-05
		1324.5	1.77513e-05
		1326	1.52615e-05
		1327.5	1.30583e-05
		1329	1.11198e-05
		1330.5	9.4238e-06
		1332	7.94819e-06
		1333.5	6.67148e-06
		1335	5.57295e-06
		1336.5	4.63294e-06
		1338	3.83295e-06
		1339.5	3.15583e-06
		1341	2.58581e-06
		1342.5	2.10854e-06
		1344	1.71106e-06
		1345.5	1.37402e-06
		1347	1.10463e-06
		1348.5	8.8375e-07
		1350	7.03602e-07
		1351.5	5.57456e-07
		1353	4.39522e-07
		1354.5	3.44855e-07
		1356	2.69264e-07
		1357.5	2.09222e-07
		1359	1.61779e-07
		1360.5	1.24486e-07
		1362	9.53252e-08
		1363.5	7.26407e-08
		1365	5.50857e-08
		1366.5	4.15703e-08
		1368	3.12186e-08
		1369.5	2.33309e-08
		1371	1.73514e-08
		1372.5	1.28417e-08
		1374	9.45796e-09
		1375.5	0
		1377	0
		1378.5	0
		1380	0
		1381.5	0
		1383	0
		1384.5	0
		1386	0
		1387.5	0
		1389	0
		1390.5	0
		1392	0
		1393.5	0
		1395	0
		1396.5	0
		1398	0
		1399.5	0
		1401	0
		1402.5	0
		1404	0
		1405.5	0
		1407	0
		1408.5	0
		1410	0
		1411.5	0
		1413	0
		1414.5	0
		1416	0
		1417.5	0
		1419	0
		1420.5	0
		1422	0
		1423.5	0
		1425	0
		1426.5	0
		1428	0
		1429.5	0
		1431	0
		1432.5	0
		1434	0
		1435.5	0
		1437	0
		1438.5	0
		1440	0
		1441.5	0
		1443	0
		1444.5	0
		1446	0
		1447.5	0
		1449	0
		1450.5	0
		1452	0
		1453.5	9.42997e-09
		1455	1.47154e-08
		1456.5	2.27347e-08
		1458	3.47748e-08
		1459.5	5.26619e-08
		1461	7.89561e-08
		1462.5	1.17201e-07
		1464	1.72241e-07
		1465.5	2.50609e-07
		1467	3.61005e-07
		1468.5	5.14859e-07
		1470	7.26975e-07
		1471.5	1.01627e-06
		1473	1.40655e-06
		1474.5	1.92733e-06
		1476	2.61467e-06
		1477.5	3.51183e-06
		1479	4.6699e-06
		1480.5	6.14806e-06
		1482	8.01358e-06
		1483.5	1.03412e-05
		1485	1.32122e-05
		1486.5	1.67122e-05
		1488	2.0929e-05
		1489.5	2.59491e-05
		1491	3.18532e-05
		1492.5	3.87115e-05
		1494	4.65784e-05
		1495.5	5.54864e-05
		1497	6.54402e-05
		1498.5	7.64118e-05
		1500	8.83351e-05
		1501.5	0.000101103
		1503	0.000114564
		1504.5	0.000128527
		1506	0.000142756
		1507.5	0.000156983
		1509	0.00017091
		1510.5	0.000184221
		1512	0.000196593
		1513.5	0.000207709
		1515	0.000217269
		1516.5	0.000225008
		1518	0.000230704
		1519.5	0.000234191
		1521	0.000235365
		1522.5	0.000234191
		1524	0.000230704
		1525.5	0.000225008
		1527	0.000217269
		1528.5	0.000207709
		1530	0.000196593
		1531.5	0.000184221
		1533	0.00017091
		1534.5	0.000156983
		1536	0.000142756
		1537.5	0.000128527
		1539	0.000114564
		1540.5	0.000101103
		1542	8.83351e-05
		1543.5	7.64118e-05
		1545	6.54402e-05
		1546.5	5.54864e-05
		1548	4.65784e-05
		1549.5	3.87115e-05
		1551	3.18532e-05
		1552.5	2.59491e-05
		1554	2.0929e-05
		1555.5	1.67122e-05
		1557	1.32122e-05
		1558.5	1.03412e-05
		1560	8.01358e-06
		1561.5	6.14806e-06
		1563	4.6699e-06
		1564.5	3.51183e-06
		1566	2.61467e-06
		1567.5	1.92733e-06
		1569	1.40655e-06
		1570.5	1.01627e-06
		1572	7.26975e-07
		1573.5	5.14859e-07
		1575	3.61005e-07
		1576.5	2.50609e-07
		1578	1.72241e-07
		1579.5	1.17201e-07
		1581	7.89561e-08
		1582.5	5.26619e-08
		1584	3.47748e-08
		1585.5	2.27347e-08
		1587	1.47154e-08
		1588.5	9.42997e-09
		1590	0
		1591.5	0
		1593	0
		1594.5	0
		1596	0
		1597.5	0
		1599	0
		1600.5	0
		1602	0
		1603.5	0
		1605	0
		1606.5	0
		1608	0
		1609.5	0
		1611	0
		1612.5	0
		1614	0
		1615.5	0
		1617	0
		1618.5	0
		1620	0
		1621.5	0
		1623	0
		1624.5	0
		1626	0
		1627.5	0
		1629	0
		1630.5	0
		1632	0
		1633.5	0
		1635	0
		1636.5	0
		1638	0
		1639.5	0
		1641	0
		1642.5	0
		1644	0
		1645.5	0
		1647	0
		1648.5	0
		1650	0
		1651.5	0
		1653	0
		1654.5	0
		1656	0
		1657.5	0
		1659	0
		1660.5	0
		1662	0
		1663.5	0
		1665	0
		1666.5	0
		1668	0
		1669.5	0
		1671	0
		1672.5	0
		1674	0
		1675.5	0
		1677	0
		1678.5	0
		1680	1.57613e-08
		1681.5	2.86657e-08
		1683	5.11747e-08
		1684.5	8.96754e-08
		1686	1.54246e-07
		1687.5	2.60424e-07
		1689	4.3159e-07
		1690.5	7.0208e-07
		1692	1.12105e-06
		1693.5	1.75707e-06
		1695	2.70319e-06
		1696.5	4.08215e-06
		1698	6.05096e-06
		1699.5	8.8041e-06
		1701	1.25739e-05
		1702.5	1.7627e-05
		1704	2.42556e-05
		1705.5	3.27619e-05
		1707	4.34362e-05
		1708.5	5.65272e-05
		1710	7.22084e-05
		1711.5	9.05404e-05
		1713	0.000111435
		1714.5	0.000134625
		1716	0.000159644
		1717.5	0.000185825
		1719	0.000212315
		1720.5	0.000238111
		1722	0.000262123
		1723.5	0.000283239
		1725	0.000300418
		1726.5	0.000312769
		1728	0.000319629
		1729.5	0.000320621
		1731	0.000315691
		1732.5	0.00030511
		1734	0.000289451
		1735.5	0.000269537
		1737	0.000246369
		1738.5	0.000221043
		1740	0.000194667
		1741.5	0.00016828
		1743	0.00014279
		1744.5	0.000118929
		1746	9.72298e-05
		1747.5	7.80255e-05
		1749	6.14608e-05
		1750.5	4.75208e-05
		1752	3.60657e-05
		1753.5	2.68676e-05
		1755	1.96466e-05
		1756.5	1.41017e-05
		1758	9.93522e-06
		1759.5	6.87082e-06
		1761	4.66406e-06
		1762.5	3.10774e-06
		1764	2.03259e-06
		1765.5	1.3049e-06
		1767	8.223e-07
		1768.5	5.08636e-07
		1770	3.08822e-07
		1771.5	1.84049e-07
		1773	1.07667e-07
		1774.5	6.18242e-08
		1776	3.48463e-08
		1777.5	1.92788e-08
		1779	1.04695e-08
		1780.5	0
		1782	0
		1783.5	0
		1785	0
		1786.5	0
		1788	0
		1789.5	0
		1791	0
		1792.5	0
		1794	0
		1795.5	0
		1797	0
		1798.5	0
		1800	0
		1801.5	1.05076e-08
		1803	1.56884e-08
		1804.5	2.32309e-08
		1806	3.41165e-08
		1807.5	4.96905e-08
		1809	7.17783e-08
		1810.5	1.02831e-07
		1812	1.46105e-07
		1813.5	2.05882e-07
		1815	2.87727e-07
		1816.5	3.98799e-07
		1818	5.482e-07
		1819.5	7.47368e-07
		1821	1.01051e-06
		1822.5	1.35506e-06
		1824	1.80213e-06
		1825.5	2.37697e-06
		1827	3.10938e-06
		1828.5	4.03398e-06
		1830	5.19044e-06
		1831.5	6.62348e-06
		1833	8.3826e-06
		1834.5	1.05216e-05
		1836	1.30977e-05
		1837.5	1.61704e-05
		1839	1.97996e-05
		1840.5	2.40438e-05
		1842	2.89574e-05
		1843.5	3.45882e-05
		1845	4.09739e-05
		1846.5	4.81389e-05
		1848	5.60915e-05
		1849.5	6.48199e-05
		1851	7.429e-05
		1852.5	8.44428e-05
		1854	9.51933e-05
		1855.5	0.000106429
		1857	0.000118012
		1858.5	0.000129778
		1860	0.000141543
		1861.5	0.000153104
		1863	0.000164246
		1864.5	0.000174748
		1866	0.000184393
		1867.5	0.000192967
		1869	0.000200279
		1870.5	0.000206157
		1872	0.000210461
		1873.5	0.000213086
		1875	0.000213968
		1876.5	0.000213086
		1878	0.000210461
		1879.5	0.000206157
		1881	0.000200279
		1882.5	0.000192967
		1884	0.000184393
		1885.5	0.000174748
		1887	0.000164246
		1888.5	0.000153104
		1890	0.000141543
		1891.5	0.000129778
		1893	0.000118012
		1894.5	0.000106429
		1896	9.51933e-05
		1897.5	8.44428e-05
		1899	7.429e-05
		1900.5	6.48199e-05
		1902	5.60915e-05
		1903.5	4.81389e-05
		1905	4.09739e-05
		1906.5	3.45882e-05
		1908	2.89574e-05
		1909.5	2.40438e-05
		1911	1.97996e-05
		1912.5	1.61704e-05
		1914	1.31097e-05
		1915.5	1.05395e-05
		1917	8.40903e-06
		1918.5	6.66218e-06
		1920	5.24666e-06
		1921.5	4.11497e-06
		1923	3.22509e-06
		1924.5	2.54092e-06
		1926	2.03252e-06
		1927.5	1.68592e-06
		1929	1.47143e-06
		1930.5	1.38524e-06
		1932	1.42536e-06
		1933.5	1.59762e-06
		1935	1.91652e-06
		1936.5	2.40627e-06
		1938	3.10228e-06
		1939.5	4.05296e-06
		1941	5.32191e-06
		1942.5	6.99044e-06
		1944	9.16016e-06
		1945.5	1.19556e-05
		1947	1.55266e-05
		1948.5	2.00588e-05
		1950	2.57397e-05
		1951.5	3.28225e-05
		1953	4.1554e-05
		1954.5	5.22104e-05
		1956	6.50799e-05
		1957.5	8.0454e-05
		1959	9.86177e-05
		1960.5	0.00011985
		1962	0.000144379
		1963.5	0.000172422
		1965	0.000204152
		1966.5	0.000239694
		1968	0.000279123
		1969.5	0.000322436
		1971	0.000369547
		1972.5	0.000420194
		1974	0.000473941
		1975.5	0.000530076
		1977	0.000587553
		1978.5	0.000644949
		1980	0.000700456
		1981.5	0.000751932
		1983	0.000797022
		1984.5	0.000833345
		1986	0.000858734
		1987.5	0.000871496
		1989	0.000870658
		1990.5	0.000856139
		1992	0.000828831
		1993.5	0.000790557
		1995	0.000743904
		1996.5	0.000691972
		1998	0.000638053
		1999.5	0.000585313
		2001	0.000536509
		2002.5	0.000493779
		2004	0.000458531
		2005.5	0.000431424
		2007	0.000412432
		2008.5	0.000400965
		2010	0.000396024
		2011.5	0.000396356
		2013	0.0004006
		2014.5	0.000407403
		2016	0.000415507
		2017.5	0.000423808
		2019	0.000431381
		2020.5	0.000437495
		2022	0.000441608
		2023.5	0.00044335
		2025	0.000442505
		2026.5	0.000438987
		2028	0.000432815
		2029.5	0.000424093
		2031	0.000412997
		2032.5	0.000399715
		2034	0.000384506
		2035.5	0.000367617
		2037	0.000349307
		2038.5	0.000329869
		2040	0.000309566
		2041.5	0.000288683
		2043	0.000267506
		2044.5	0.00024633
		2046	0.000225461
		2047.5	0.000205213
		2049	0.00018591
		2050.5	0.000167889
		2052	0.00015149
		2053.5	0.000137061
		2055	0.000124944
		2056.5	0.000115473
		2058	0.000108956
		2059.5	0.000105664
		2061	0.000105808
		2062.5	0.000109516
		2064	0.000116828
		2065.5	0.000127637
		2067	0.000141695
		2068.5	0.000158592
		2070	0.000177752
		2071.5	0.00019844
		2073	0.000219785
		2074.5	0.000240818
		2076	0.00026052
		2077.5	0.000277884
		2079	0.000291975
		2080.5	0.000302023
		2082	0.000307428
		2083.5	0.000307846
		2085	0.000303197
		2086.5	0.000293669
		2088	0.000279702
		2089.5	0.000261945
		2091	0.000241202
		2092.5	0.000218371
		2094	0.000194376
		2095.5	0.000170118
		2097	0.000146381
		2098.5	0.000123847
		2100	0.000103038
		2101.5	8.43196e-05
		2103	6.79012e-05
		2104.5	5.38792e-05
		2106	4.22241e-05
		2107.5	3.28442e-05
		2109	2.56105e-05
		2110.5	2.03903e-05
		2112	1.7076e-05
		2113.5	1.56096e-05
		2115	1.59989e-05
		2116.5	1.83258e-05
		2118	2.27443e-05
		2119.5	2.94687e-05
		2121	3.8749e-05
		2122.5	5.08366e-05
		2124	6.594e-05
		2125.5	8.41733e-05
		2127	0.000105503
		2128.5	0.000129702
		2130	0.000156309
		2131.5	0.000184614
		2133	0.000213665
		2134.5	0.000242307
		2136	0.000269236
		2137.5	0.000293132
		2139	0.000312702
		2140.5	0.000326839
		2142	0.000334714
		2143.5	0.000335855
		2145	0.000330191
		2146.5	0.000318065
		2148	0.000300195
		2149.5	0.000277606
		2151	0.00025153
		2152.5	0.0002233
		2154	0.000194233
		2155.5	0.000165537
		2157	0.000138231
		2158.5	0.000113097
		2160	9.06635e-05
		2161.5	7.12118e-05
		2163	5.48035e-05
		2164.5	4.13239e-05
		2166	3.05303e-05
		2167.5	2.21003e-05
		2169	1.56748e-05
		2170.5	1.08929e-05
		2172	7.41684e-06
		2173.5	4.94804e-06
		2175	3.23433e-06
		2176.5	2.07144e-06
		2178	1.29986e-06
		2179.5	7.99205e-07
		2181	4.81456e-07
		2182.5	2.84179e-07
		2184	1.64348e-07
		2185.5	9.31264e-08
		2187	5.17033e-08
		2188.5	2.81256e-08
		2190	1.49907e-08
		2191.5	0
		2193	0
		2194.5	0
		2196	0
		2197.5	0
		2199	0
		2200.5	0
		2202	0
		2203.5	0
		2205	0
		2206.5	0
		2208	0
		2209.5	0
		2211	0
		2212.5	0
		2214	0
		2215.5	0
		2217	0
		2218.5	0
		2220	0
		2221.5	0
		2223	0
		2224.5	0
		2226	0
		2227.5	0
		2229	1.05873e-08
		2230.5	1.49628e-08
		2232	2.10152e-08
		2233.5	2.93325e-08
		2235	4.06871e-08
		2236.5	5.60865e-08
		2238	7.68338e-08
		2239.5	1.04602e-07
		2241	1.41521e-07
		2242.5	1.90281e-07
		2244	2.54251e-07
		2245.5	3.37616e-07
		2247	4.45529e-07
		2248.5	5.84282e-07
		2250	7.61488e-07
		2251.5	9.8627e-07
		2253	1.26947e-06
		2254.5	1.62383e-06
		2256	2.06421e-06
		2257.5	2.60771e-06
		2259	3.27385e-06
		2260.5	4.08462e-06
		2262	5.0645e-06
		2263.5	6.24044e-06
		2265	7.64164e-06
		2266.5	9.29933e-06
		2268	1.12463e-05
		2269.5	1.35164e-05
		2271	1.61438e-05
		2272.5	1.91621e-05
		2274	2.26034e-05
		2275.5	2.64971e-05
		2277	3.08684e-05
		2278.5	3.57376e-05
		2280	4.11177e-05
		2281.5	4.70138e-05
		2283	5.34214e-05
		2284.5	6.03371e-05
		2286	6.77272e-05
		2287.5	7.5569e-05
		2289	8.38349e-05
		2290.5	9.25086e-05
		2292	0.000101603
		2293.5	0.000111191
		2295	0.000121441
		2296.5	0.000132673
		2298	0.000145402
		2299.5	0.000160389
		2301	0.000178641
		2302.5	0.000201359
		2304	0.000229801
		2305.5	0.000265044
		2307	0.000307668
		2308.5	0.000357362
		2310	0.000412667
		2311.5	0.000470789
		2313	0.000527696
		2314.5	0.000578517
		2316	0.000618191
		2317.5	0.000642292
		2319	0.000647812
		2320.5	0.00063374
		2322	0.000601271
		2323.5	0.000553593
		2325	0.00049531
		2326.5	0.000431646
		2328	0.000367629
		2329.5	0.000307432
		2331	0.000253979
		2332.5	0.000208851
		2334	0.000172442
		2335.5	0.000144267
		2337	0.000123323
		2338.5	0.000108408
		2340	9.83618e-05
		2341.5	9.22045e-05
		2343	8.9186e-05
		2344.5	8.87771e-05
		2346	9.0625e-05
		2347.5	9.4497e-05
		2349	0.000100227
		2350.5	0.000107672
		2352	0.000116679
		2353.5	0.000127066
		2355	0.000138601
		2356.5	0.000151026
		2358	0.000164015
		2359.5	0.000177214
		2361	0.000190239
		2362.5	0.000202691
		2364	0.00021417
		2365.5	0.000224291
		2367	0.000232701
		2368.5	0.000239098
		2370	0.00024324
		2371.5	0.00024496
		2373	0.000244172
		2374.5	0.000240875
		2376	0.000235152
		2377.5	0.000227165
		2379	0.000217145
		2380.5	0.000205381
		2382	0.000192203
		2383.5	0.000177968
		2385	0.000163041
		2386.5	0.000147783
		2388	0.000132531
		2389.5	0.000117591
		2391	0.000103227
		2392.5	8.96542e-05
		2394	7.70382e-05
		2395.5	6.54934e-05
		2397	5.50865e-05
		2398.5	4.58329e-05
		2400	3.77351e-05
		2401.5	3.07374e-05
		2403	2.47708e-05
		2404.5	1.97718e-05
		2406	1.56316e-05
		2407.5	1.2279e-05
		2409	9.65441e-06
		2410.5	7.73786e-06
		2412	6.57622e-06
		2413.5	6.32006e-06
		2415	7.26976e-06
		2416.5	9.9263e-06
		2418	1.50354e-05
		2419.5	2.36055e-05
		2421	3.68743e-05
		2422.5	5.6196e-05
		2424	8.28317e-05
		2425.5	0.000117647
		2427	0.000160753
		2428.5	0.000211166
		2430	0.000266587
		2431.5	0.000323402
		2433	0.000376966
		2434.5	0.000422187
		2436	0.000454301
		2437.5	0.000469694
		2439	0.000466564
		2440.5	0.000445291
		2442	0.000408324
		2443.5	0.000359745
		2445	0.000304518
		2446.5	0.000247661
		2448	0.000193523
		2449.5	0.00014529
		2451	0.000104801
		2452.5	7.26313e-05
		2454	4.83627e-05
		2455.5	3.09404e-05
		2457	1.90182e-05
		2458.5	1.12316e-05
		2460	6.37295e-06
		2461.5	3.47431e-06
		2463	1.8198e-06
		2464.5	9.15818e-07
		2466	4.42814e-07
		2467.5	2.05713e-07
		2469	9.18188e-08
		2470.5	3.93758e-08
		2472	1.62239e-08
		2473.5	0
		2475	0
		2476.5	0
		2478	0
		2479.5	0
		2481	0
		2482.5	0
		2484	0
		2485.5	0
		2487	0
		2488.5	0
		2490	0
		2491.5	0
		2493	0
		2494.5	0
		2496	0
		2497.5	0
		2499	0
		2500.5	0
		2502	0
		2503.5	0
		2505	0
		2506.5	0
		2508	0
		2509.5	0
		2511	0
		2512.5	0
		2514	0
		2515.5	0
		2517	0
		2518.5	0
		2520	0
		2521.5	0
		2523	0
		2524.5	0
		2526	0
		2527.5	0
		2529	0
		2530.5	0
		2532	0
		2533.5	0
		2535	0
		2536.5	0
		2538	0
		2539.5	0
		2541	0
		2542.5	0
		2544	0
		2545.5	0
		2547	0
		2548.5	0
		2550	0
		2551.5	0
		2553	0
		2554.5	0
		2556	0
		2557.5	0
		2559	0
		2560.5	0
		2562	0
		2563.5	0
		2565	1.28617e-08
		2566.5	3.63326e-08
		2568	9.73119e-08
		2569.5	2.4712e-07
		2571	5.95007e-07
		2572.5	1.35834e-06
		2574	2.94012e-06
		2575.5	6.03385e-06
		2577	1.17408e-05
		2578.5	2.16605e-05
		2580	3.78891e-05
		2581.5	6.28393e-05
		2583	9.88144e-05
		2584.5	0.000147327
		2586	0.000208264
		2587.5	0.000279138
		2589	0.000354727
		2590.5	0.000427409
		2592	0.000488274
		2593.5	0.000528878
		2595	0.00054315
		2596.5	0.000528878
		2598	0.000488274
		2599.5	0.000427409
		2601	0.000354727
		2602.5	0.000279138
		2604	0.000208264
		2605.5	0.000147327
		2607	9.88144e-05
		2608.5	6.28393e-05
		2610	3.78891e-05
		2611.5	2.16605e-05
		2613	1.17408e-05
		2614.5	6.03385e-06
		2616	2.94012e-06
		2617.5	1.35834e-06
		2619	5.95007e-07
		2620.5	2.4712e-07
		2622	9.73119e-08
		2623.5	3.63326e-08
		2625	1.28617e-08
		2626.5	0
		2628	0
		2629.5	0
		2631	0
		2632.5	0
		2634	0
		2635.5	0
		2637	0
		2638.5	0
		2640	0
		2641.5	0
		2643	0
		2644.5	0
		2646	0
		2647.5	0
		2649	0
		2650.5	0
		2652	0
		2653.5	0
		2655	0
		2656.5	0
		2658	0
		2659.5	0
		2661	0
		2662.5	0
		2664	0
		2665.5	0
		2667	0
		2668.5	0
		2670	0
		2671.5	0
		2673	0
		2674.5	0
		2676	0
		2677.5	0
		2679	0
		2680.5	0
		2682	0
		2683.5	0
		2685	0
		2686.5	0
		2688	0
		2689.5	0
		2691	0
		2692.5	0
		2694	0
		2695.5	0
		2697	0
		2698.5	0
		2700	0
		2701.5	0
		2703	0
		2704.5	0
		2706	0
		2707.5	0
		2709	0
		2710.5	0
		2712	0
		2713.5	0
		2715	0
		2716.5	0
		2718	0
		2719.5	0
		2721	0
		2722.5	0
		2724	0
		2725.5	0
		2727	0
		2728.5	0
		2730	0
		2731.5	0
		2733	0
		2734.5	0
		2736	0
		2737.5	0
		2739	0
		2740.5	0
		2742	0
		2743.5	0
		2745	0
		2746.5	0
		2748	0
		2749.5	0
		2751	0
		2752.5	0
		2754	0
		2755.5	0
		2757	0
		2758.5	0
		2760	0
		2761.5	0
		2763	0
		2764.5	0
		2766	0
		2767.5	0
		2769	0
		2770.5	0
		2772	0
		2773.5	0
		2775	0
		2776.5	0
		2778	0
		2779.5	0
		2781	0
		2782.5	0
		2784	0
		2785.5	0
		2787	0
		2788.5	0
		2790	0
		2791.5	0
		2793	0
		2794.5	0
		2796	0
		2797.5	0
		2799	0
		2800.5	0
		2802	0
		2803.5	0
		2805	0
		2806.5	0
		2808	0
		2809.5	0
		2811	0
		2812.5	0
		2814	0
		2815.5	1.20992e-08
		2817	2.28556e-08
		2818.5	4.23023e-08
		2820	7.67137e-08
		2821.5	1.36307e-07
		2823	2.37302e-07
		2824.5	4.04781e-07
		2826	6.76512e-07
		2827.5	1.10782e-06
		2829	1.77745e-06
		2830.5	2.79425e-06
		2832	4.30396e-06
		2833.5	6.49544e-06
		2835	9.60474e-06
		2836.5	1.39155e-05
		2838	1.97538e-05
		2839.5	2.7475e-05
		2841	3.74423e-05
		2842.5	4.99947e-05
		2844	6.54067e-05
		2845.5	8.38411e-05
		2847	0.0001053
		2848.5	0.00012958
		2850	0.000156237
		2851.5	0.000184572
		2853	0.000213641
		2854.5	0.000242293
		2856	0.000269236
		2857.5	0.000293132
		2859	0.000312702
		2860.5	0.000326839
		2862	0.000334714
		2863.5	0.000335855
		2865	0.000330191
		2866.5	0.000318065
		2868	0.000300195
		2869.5	0.000277606
		2871	0.00025153
		2872.5	0.0002233
		2874	0.000194233
		2875.5	0.000165537
		2877	0.000138231
		2878.5	0.000113097
		2880	9.06635e-05
		2881.5	7.12118e-05
		2883	5.48035e-05
		2884.5	4.13239e-05
		2886	3.05303e-05
		2887.5	2.21003e-05
		2889	1.56748e-05
		2890.5	1.08929e-05
		2892	7.41684e-06
		2893.5	4.94804e-06
		2895	3.23433e-06
		2896.5	2.07144e-06
		2898	1.29986e-06
		2899.5	7.99205e-07
		2901	4.81456e-07
		2902.5	2.84179e-07
		2904	1.64348e-07
		2905.5	9.31264e-08
		2907	5.17033e-08
		2908.5	2.81256e-08
		2910	1.49907e-08
		2911.5	0
		2913	0
		2914.5	0
		2916	0
		2917.5	0
		2919	0
		2920.5	0
		2922	0
		2923.5	0
		2925	0
		2926.5	0
		2928	0
		2929.5	0
		2931	0
		2932.5	0
		2934	0
		2935.5	0
		2937	0
		2938.5	0
		2940	0
		2941.5	0
		2943	0
		2944.5	0
		2946	0
		2947.5	0
		2949	0
		2950.5	0
		2952	0
		2953.5	0
		2955	0
		2956.5	0
		2958	0
		2959.5	0
		2961	0
		2962.5	0
		2964	0
		2965.5	0
		2967	0
		2968.5	0
		2970	0
		2971.5	0
		2973	0
		2974.5	0
		2976	0
		2977.5	0
		2979	0
		2980.5	0
		2982	0
		2983.5	0
		2985	0
		2986.5	0
		2988	0
		2989.5	0
		2991	0
		2992.5	0
		2994	0
		2995.5	0
		2997	0
		2998.5	0
[truncated: 1 more rows]

## Sheet: Table 2- sample Ama-2
	U	Th	Th/U	207Pb/235U	2sigma err	206Pb/238U	2sigma err	Rho	207Pb/206Pb	2sigma err	206Pb/238Uage	2sigma err	207Pb/206Pbage	2sigma err	%Conc
AMA-3 - 1	72.72	98	1.34763	0.82	0.03	0.0983	0.002	0.21383	0.0612	0.0024	604	12	623	85	99.67
AMA-3 - 2	251.7	169.1	0.671832	0.847	0.017	0.1043	0.0018	0.79889	0.0591	0.0011	640	10	563	40	102.811
AMA-3 - 3	85.3	21.14	0.247831	0.932	0.028	0.1104	0.002	0.31613	0.0612	0.0019	675	11	669	65	100.897
AMA-3 - 4	155.1	60.7	0.39136	1.084	0.031	0.1243	0.002	0.7078	0.0626	0.0015	755	11	701	53	101.615
AMA-3 - 5	304	234	0.769737	1.057	0.023	0.1231	0.0018	0.77881	0.0621	0.001	748	10	669	36	102.326
AMA-3 - 6	206.1	203.5	0.987385	0.856	0.018	0.102	0.0017	0.56517	0.0612	0.0013	626.1	9.9	643	46	99.7928
AMA-3 - 7	40.3	58	1.43921	2.569	0.081	0.231	0.0045	0.32581	0.0822	0.0027	1339	24	1245	65	103.96
AMA-3 - 8	189.2	287.5	1.51956	0.908	0.023	0.1075	0.0017	0.56411	0.0609	0.0013	658	10	630	47	100.152
AMA-3 - 9	133.4	117.3	0.87931	1.096	0.024	0.1246	0.0025	0.48717	0.0633	0.0016	757	14	719	53	100.933
AMA-3 - 10	284	457	1.60915	1.014	0.026	0.1178	0.0025	0.84529	0.062	0.0012	717	15	670	42	101.128
AMA-3 - 11	53.3	26.82	0.503189	10.41	0.15	0.4637	0.007	0.51266	0.1622	0.0022	2455	31	2476	23	99.3525
AMA-3 - 12	181.8	26.01	0.143069	0.877	0.021	0.1047	0.0016	0.72615	0.0604	0.0014	642	9.3	612	52	100.312
AMA-3 - 13	64.54	82	1.27053	0.789	0.035	0.0966	0.0014	0.085576	0.0576	0.0025	594.2	8.2	516	97	100.712
AMA-3 - 14	187.3	150.3	0.802456	4.619	0.072	0.2975	0.0043	0.76593	0.1112	0.0012	1678	21	1820	19	95.831
AMA-3 - 15	703	37.1	0.0527738	0.947	0.028	0.1084	0.002	0.72335	0.0617	0.001	663	11	675	37	98.5141
AMA-3 - 16	51.36	60.49	1.17776	0.803	0.043	0.0986	0.0019	0.060604	0.058	0.0032	606	11	530	110	101
AMA-3 - 17	107.5	71.4	0.664186	6.48	0.11	0.378	0.0059	0.71955	0.1238	0.0018	2066	27	2008	25	101.175
AMA-3 - 18	175.1	95.5	0.545403	3.481	0.079	0.2675	0.0047	0.83461	0.093	0.0014	1527	24	1496	30	100.461
AMA-3 - 19	142.7	137.3	0.962158	5.43	0.096	0.3448	0.0058	0.84349	0.1125	0.0016	1909	28	1837	25	101.112
AMA-3 - 20	462.4	115.9	0.250649	0.904	0.019	0.1083	0.0015	0.7631	0.0595	0.0011	662.9	8.5	579	39	101.516
AMA-3 - 21	264.4	312	1.18003	0.844	0.02	0.1008	0.0017	0.66115	0.0602	0.0014	619	9.9	613	50	99.5177
AMA-3 - 22	138.2	129.2	0.934877	0.838	0.024	0.1001	0.0019	0.30624	0.0601	0.0018	615	11	595	65	99.3538
AMA-3 - 23	278	218	0.784173	0.734	0.019	0.0763	0.0019	0.62397	0.0687	0.0014	474	11	893	42	84.9462
AMA-3 - 24	32.3	20.19	0.625077	0.766	0.051	0.0958	0.0019	0.38767	0.0582	0.0035	590	11	510	130	101.201
AMA-3 - 25	130.4	113.9	0.873466	11.58	0.19	0.476	0.007	0.75211	0.1737	0.002	2509	30	2596	20	97.4747
AMA-3 - 26	281	203.2	0.723132	0.817	0.022	0.0961	0.0016	0.74313	0.0602	0.0014	591.3	9.2	619	48	97.7355
AMA-3 - 27	66.5	63.6	0.956391	0.793	0.035	0.0941	0.0021	0.18497	0.0589	0.0027	579	12	559	99	98.1356
AMA-3 - 28	266	118	0.443609	0.763	0.017	0.0925	0.0017	0.55818	0.059	0.0013	570	10	565	46	99.1304
AMA-3 - 29	99.9	61.7	0.617618	1.426	0.046	0.1439	0.0028	0.63167	0.0707	0.0022	866	16	960	59	96.3293
AMA-3 - 30	87.5	103.1	1.17829	6.287	0.093	0.3616	0.0059	0.50474	0.1248	0.0021	1989	28	2025	28	98.7097
AMA-3 - 31	138.4	160.3	1.15824	0.754	0.025	0.089	0.0017	0.54932	0.0606	0.0018	549	10	638	63	96.4851
AMA-3 - 32	28.66	22.79	0.795185	0.803	0.048	0.0917	0.0023	0.23388	0.0614	0.0038	565	14	600	130	94.7987
AMA-3 - 33	49.94	27.96	0.559872	0.818	0.039	0.0948	0.0017	0.12334	0.0625	0.003	583.9	9.8	650	110	96.3531
AMA-3 - 34	432.3	235.8	0.545455	3.047	0.039	0.2323	0.0032	0.83683	0.0939	0.0011	1346	16	1504	23	94.8823
AMA-3 - 35	307.2	122.3	0.398112	0.784	0.013	0.0927	0.0014	0.58394	0.0596	0.0013	571.5	8.1	584	46	97.2766
AMA-3 - 36	95.9	71.4	0.744526	0.798	0.028	0.0962	0.0019	0.53082	0.0589	0.002	592	11	554	77	99.8314
AMA-3 - 37	101.7	55.8	0.548673	0.812	0.025	0.0969	0.0017	0.42889	0.061	0.0018	596.4	9.8	628	64	98.4158
AMA-3 - 38	97.4	77.9	0.799795	0.87	0.03	0.104	0.0018	0.33854	0.0594	0.0021	638	11	592	81	100
AMA-3 - 39	281	189.7	0.675089	0.766	0.019	0.092	0.0014	0.57416	0.0592	0.0013	567.1	8.3	571	48	98.4549
AMA-3 - 40	95.4	69.2	0.725367	0.81	0.024	0.0969	0.0018	0.39814	0.0595	0.0018	596	10	600	65	98.5124
AMA-3 - 41	215	180	0.837209	0.845	0.02	0.1018	0.0019	0.72392	0.059	0.0012	625	11	563	46	100.644
AMA-3 - 42	59.6	97.5	1.63591	0.856	0.04	0.0998	0.002	0.12204	0.0618	0.0029	613	12	640	100	97.3016
AMA-3 - 43	489	371	0.758691	0.516	0.013	0.0666	0.0011	0.57922	0.0549	0.0012	415.5	6.6	402	52	98.5064
AMA-3 - 44	115.6	68.3	0.59083	1.857	0.05	0.1781	0.0035	0.76709	0.0746	0.0016	1056	19	1054	44	99.0619
AMA-3 - 45	135	59.2	0.438519	4.82	0.14	0.281	0.0072	0.82761	0.1205	0.0019	1600	35	1973	27	89.7868
AMA-3 - 46	225.8	60.1	0.266165	0.951	0.021	0.1081	0.0016	0.44112	0.062	0.0015	661.7	9.4	666	51	97.74
AMA-3 - 47	354	373	1.05367	0.863	0.019	0.1017	0.002	0.5594	0.0606	0.0012	624	11	616	44	98.8906
AMA-3 - 48	252	200.4	0.795238	0.804	0.023	0.0965	0.0017	0.53127	0.0595	0.0016	593.9	9.8	589	59	99.1486
AMA-3 - 49	167.2	149.3	0.892943	0.861	0.024	0.1034	0.0019	0.70027	0.0594	0.0015	634	11	588	54	100.795
AMA-3 - 50	118.3	167	1.41167	0.831	0.03	0.0977	0.0017	0.62049	0.0616	0.0017	601	10	650	61	97.4068
AMA-3 - 51	147.3	103.8	0.704684	0.848	0.024	0.0992	0.0017	0.41649	0.0612	0.0016	609.5	9.7	636	60	97.6763
AMA-3 - 52	271	42.4	0.156458	0.803	0.04	0.0916	0.0025	0.87514	0.0621	0.0019	564	15	663	65	94.9495
AMA-3 - 53	60.6	36.92	0.609241	0.931	0.033	0.1056	0.0022	0.038726	0.063	0.0027	647	13	679	91	96.8563
AMA-3 - 54	373.3	56.5	0.151353	2.294	0.043	0.2053	0.003	0.77227	0.08	0.0012	1204	16	1193	31	99.5864
AMA-3 - 55	64.2	38.1	0.593458	0.694	0.035	0.0835	0.0016	0.062432	0.0602	0.0029	518.6	9.8	580	110	96.9346
AMA-3 - 56	61.8	65.7	1.06311	0.867	0.032	0.101	0.0027	0.17786	0.0608	0.0026	620	16	618	97	97.7918
AMA-3 - 57	95.6	86.9	0.908996	0.814	0.028	0.0987	0.0019	0.30659	0.0586	0.002	606	11	545	77	100.498
AMA-3 - 58	248	267	1.07661	0.945	0.021	0.1097	0.0022	0.60549	0.0615	0.0014	671	13	642	51	99.5549
AMA-3 - 59	159.4	100.2	0.628607	0.838	0.026	0.0986	0.002	0.47485	0.0611	0.002	606	12	634	72	98.3766
AMA-3 - 60	178	69	0.38764	0.797	0.02	0.0964	0.0015	0.53367	0.06	0.0016	593.1	9.1	610	58	99.8485
AMA-3 - 61	406	95.7	0.235714	2	0.27	0.1377	0.0085	0.91646	0.0974	0.0087	828	48	1420	180	79.5389
AMA-3 - 62	324	199	0.614198	0.857	0.021	0.1026	0.002	0.64335	0.0601	0.0012	629	12	605	42	100.319
AMA-3 - 63	169.1	85.1	0.503253	1.83	0.035	0.177	0.0026	0.82381	0.0745	0.0012	1051	14	1050	33	99.4324
AMA-3 - 64	215.7	246.7	1.14372	0.835	0.025	0.0987	0.0017	0.60898	0.0608	0.0016	607	10	638	54	98.6992
AMA-3 - 65	312	171.8	0.550641	4.92	0.1	0.3299	0.0063	0.88222	0.1074	0.0014	1837	30	1753	23	101.886
AMA-3 - 66	418	105	0.251196	24.93	0.5	0.692	0.016	0.8685	0.2559	0.0029	3397	57	3222	18	102.877
AMA-3 - 67	407	296	0.727273	22.95	0.27	0.6348	0.0087	0.8651	0.2609	0.0023	3167	34	3253	14	98.232
AMA-3 - 68	120.5	129.8	1.07718	0.805	0.03	0.0972	0.002	0.52073	0.0587	0.002	598	12	541	76	100.168
AMA-3 - 69	346	224	0.647399	0.935	0.021	0.111	0.002	0.79945	0.0612	0.0011	678	11	637	40	101.345
AMA-3 - 70	7.41	3.17	0.4278	1.04	0.21	0.1099	0.0077	0.052924	0.064	0.014	671	45	710	440	97.2464
AMA-3 - 71	89.1	74.1	0.83165	0.791	0.033	0.0937	0.0016	0.085846	0.0613	0.0025	577.3	9.5	674	89	97.5169
AMA-3 - 72	57.5	45.5	0.791304	0.85	0.037	0.107	0.0021	0.26358	0.0567	0.0023	655	12	476	83	104.968
AMA-3 - 73	134.6	113	0.839525	0.832	0.025	0.1008	0.0018	0.57793	0.0596	0.0015	619	10	599	57	100.979
AMA-3 - 74	407	256	0.628993	0.836	0.018	0.0992	0.0014	0.66911	0.0609	0.0012	609.6	8.5	633	41	98.7206
AMA-3 - 75	187.1	100.2	0.535542	6.462	0.093	0.3646	0.0063	0.79117	0.1289	0.0016	2003	30	2080	22	98.2344
AMA-3 - 76	47.2	50.8	1.07627	0.888	0.042	0.1046	0.0026	0.35323	0.061	0.0028	641	15	610	100	100
AMA-3 - 77	135.7	98.2	0.723655	0.787	0.021	0.0976	0.0017	0.56307	0.0586	0.0015	600	10	549	58	101.695
AMA-3 - 78	128.9	93.4	0.724593	0.834	0.027	0.1003	0.0022	0.3118	0.06	0.002	616	13	596	74	100.326
AMA-3 - 79	308	80.2	0.26039	6.162	0.093	0.3572	0.0063	0.84752	0.1245	0.0018	1968	30	2024	26	98.4985
AMA-3 - 80	173.6	135	0.77765	0.832	0.023	0.1018	0.0018	0.46594	0.0594	0.0016	625	10	580	59	101.626
AMA-3 - 81	122	247.8	2.03115	0.821	0.029	0.099	0.002	0.20249	0.0596	0.0023	608	12	565	87	99.509
AMA-3 - 82	70.8	66.3	0.936441	0.814	0.028	0.0999	0.0017	0.15389	0.0592	0.0021	614	10	557	78	101.488
AMA-3 - 83	97.3	99.9	1.02672	0.919	0.035	0.1124	0.002	0.43515	0.0592	0.0022	687	12	577	84	104.249
AMA-3 - 84	134.8	130	0.964392	1.074	0.023	0.1209	0.0021	0.68696	0.0642	0.0013	736	12	744	43	99.594
AMA-3 - 85	51.8	38.6	0.745174	0.944	0.04	0.1063	0.002	0.037208	0.0647	0.0032	651	12	740	100	97.0194
AMA-3 - 86	87.1	97.5	1.1194	0.861	0.038	0.0986	0.0016	0.50284	0.0636	0.0024	605.8	9.6	718	80	96.6188
AMA-3 - 87	101	84.9	0.840594	0.848	0.028	0.1003	0.0021	0.3124	0.0613	0.002	616	12	667	68	98.7179
AMA-3 - 88	206	145.8	0.707767	0.919	0.024	0.1074	0.002	0.60737	0.0624	0.0018	657	12	688	58	99.5455
AMA-3 - 89	141	71.5	0.507092	0.869	0.025	0.1032	0.0019	0.5743	0.0608	0.0015	633	11	630	54	99.8423
AMA-3 - 90	496	110.7	0.223185	0.944	0.022	0.1099	0.002	0.72769	0.0618	0.0012	672	12	660	40	99.7033
AMA-3 - 91	82.7	133.7	1.61669	0.788	0.03	0.0937	0.0017	0.0091225	0.0607	0.0026	577	10	599	91	98.1293
AMA-3 - 92	139.9	78.8	0.563259	0.817	0.023	0.1009	0.0019	0.62167	0.0588	0.0012	620	11	559	42	101.974
AMA-3 - 93	405	328	0.809877	0.759	0.015	0.0919	0.0017	0.75568	0.0595	0.0012	567	10	580	44	99.0047
AMA-3 - 94	568	227	0.399648	9.26	0.21	0.385	0.009	0.92081	0.1742	0.002	2097	42	2602	19	88.4064
AMA-3 - 95	52.2	89.3	1.71073	2.701	0.072	0.2252	0.0031	0.38511	0.0867	0.0021	1309	16	1361	47	98.7925
AMA-3 - 96	312	256.5	0.822115	4.507	0.078	0.3032	0.005	0.9052	0.1075	0.0012	1706	25	1755	20	98.442
AMA-3 - 97	277	120.6	0.435379	0.802	0.016	0.0968	0.0015	0.58725	0.0599	0.0014	595.6	8.7	601	51	99.7154
AMA-3 - 98	199.5	54.6	0.273684	2.437	0.043	0.2089	0.003	0.58226	0.0843	0.0014	1223	16	1298	32	97.3726
AMA-3 - 99	176.1	85.1	0.483248	0.88	0.023	0.1029	0.0015	0.39475	0.0613	0.0015	631.5	8.7	661	50	97.907
AMA-3 - 100	108.7	147	1.35235	0.759	0.028	0.0905	0.0017	0.3827	0.0614	0.0023	558	10	642	82	97.2125
AMA-3 - 101	69.7	61.5	0.882353	0.847	0.039	0.0989	0.002	0.39696	0.0631	0.0027	609	12	694	91	97.7528
AMA-3 - 102	588	214.1	0.364116	2.009	0.028	0.1897	0.0024	0.81012	0.0769	0.001	1119	13	1114	27	100.107
AMA-3 - 103	200.5	165.7	0.826434	0.885	0.029	0.0985	0.0016	0.50388	0.0632	0.0017	605.8	9.7	715	60	94.3614
AMA-3 - 104	240	172.6	0.719167	0.509	0.018	0.0663	0.0011	0.67267	0.0551	0.0016	413.6	6.7	430	64	99.1847
AMA-3 - 105	255.7	184.2	0.720375	0.837	0.02	0.0998	0.0018	0.77526	0.0607	0.0013	613	10	625	45	99.513
AMA-3 - 106	64.3	44.2	0.687403	0.856	0.033	0.101	0.0019	0.43119	0.0614	0.0022	620	11	641	76	99.2
AMA-3 - 107	293	269	0.918089	5.568	0.086	0.3464	0.0053	0.91425	0.1167	0.0011	1916	25	1904	17	100.314
AMA-3 - 108	170.2	252	1.48061	0.948	0.025	0.1077	0.0019	0.6169	0.0632	0.0014	659	11	732	51	97.1976
AMA-3 - 109	252.3	317.9	1.26001	0.888	0.022	0.1026	0.0018	0.41784	0.0622	0.0017	630	11	691	55	97.5232
AMA-3 - 110	138.4	146.7	1.05997	0.932	0.023	0.1061	0.0017	0.50509	0.0627	0.0016	650	10	703	56	97.3054
AMA-3 - 111	288.7	138.4	0.47939	5.576	0.083	0.3186	0.0052	0.86733	0.1262	0.0014	1782	25	2046	20	93.2496
AMA-3 - 112	228.7	116.4	0.508964	0.878	0.019	0.1038	0.0013	0.51924	0.0608	0.0012	636.3	7.7	636	45	99.5775
AMA-3 - 113	323.8	345	1.06547	0.79	0.019	0.095	0.0019	0.66814	0.0599	0.0013	585	11	590	47	98.8176
AMA-3 - 114	191.5	91	0.475196	6.151	0.088	0.3605	0.006	0.80359	0.1235	0.0017	1983	28	2007	24	99.3487
AMA-3 - 115	253	48.9	0.193281	0.817	0.016	0.0972	0.0017	0.46461	0.0605	0.0015	598	10	627	52	98.6962
AMA-3 - 116	379	341	0.899736	0.879	0.024	0.1051	0.002	0.68457	0.0602	0.0011	644	12	622	41	100.468
AMA-3 - 117	389	198.2	0.509512	0.84	0.019	0.1009	0.0018	0.78477	0.0598	0.0011	619	10	587	42	100.162
AMA-3 - 118	82.7	79.8	0.964933	0.803	0.031	0.0937	0.0018	0.17661	0.0609	0.0024	578	10	599	86	96.6555
AMA-3 - 119	95.8	45.3	0.47286	0.797	0.032	0.0948	0.002	0.25314	0.06	0.0022	584	11	588	77	98.1513
AMA-3 - 120	312	247.2	0.792308	6.453	0.074	0.3598	0.0051	0.89478	0.129	0.0016	1981	24	2082	22	97.1698
AMA-3 - 121	211.7	104.8	0.49504	3.21	0.052	0.2499	0.0041	0.84664	0.093	0.0012	1437	21	1485	25	98.5597

## Sheet: Table 3- sample Ama-4
	U	Th	Th/U	207Pb/235U	2sigma err	206Pb/238U	2sigma err	Rho	207Pb/206Pb	2sigma err	206Pb/238Uage	2sigma err	207Pb/206Pbage	2sigma err	%Conc.
AMA-04-1	92.8	126	1.35776	1.52	0.037	0.1492	0.0027	0.30985	0.0714	0.0017	896	15	971	51	95.6243
AMA-04-2	229.2	188	0.820244	1.058	0.02	0.1176	0.0023	0.29366	0.0636	0.0014	716	13	731	44	97.5477
AMA-04-3	246.9	172.3	0.697853	0.907	0.019	0.1036	0.0019	0.32262	0.0622	0.0013	635	11	679	47	96.9466
AMA-04-4	457	455	0.995624	1.484	0.027	0.1484	0.0029	0.58062	0.0716	0.0012	891	16	974	34	96.533
AMA-04-5	152.7	133.1	0.871644	1.62	0.029	0.1601	0.0027	0.22907	0.0724	0.0017	957	15	1006	49	97.7528
AMA-04-6	58	56.9	0.981034	1.943	0.058	0.1878	0.0034	0.47036	0.0735	0.0017	1109	18	1033	46	101.464
AMA-04-7	255.7	400	1.56433	1.237	0.031	0.1324	0.0023	0.21193	0.0662	0.0016	802	13	798	52	98.2843
AMA-04-8	25.59	8.91	0.348183	1.178	0.057	0.1306	0.0038	0.28415	0.0651	0.0032	791	22	730	110	100.764
AMA-04-9	189.2	31.3	0.165433	1.064	0.026	0.1228	0.0026	0.37949	0.0627	0.0014	746	15	701	49	101.359
AMA-04-10	200.2	258.6	1.29171	0.781	0.019	0.0938	0.0018	0.49394	0.0595	0.0012	578	11	590	45	98.4668
AMA-04-11	34.5	36.15	1.04783	6.62	0.17	0.3402	0.0063	0.36074	0.1305	0.0035	1887	31	2093	46	91.691
AMA-04-12	118.6	61.4	0.517707	1.034	0.031	0.114	0.0018	0.2474	0.065	0.0019	696	10	757	62	96.5326
AMA-04-13	94.2	42.7	0.453291	0.808	0.028	0.0979	0.0017	0.14293	0.0594	0.0023	602	10	559	80	100.333
AMA-04-14	156.5	63.2	0.403834	2.724	0.066	0.2239	0.0055	0.71857	0.0872	0.0018	1301	29	1358	39	97.6727
AMA-04-15	184	108.5	0.589674	0.764	0.024	0.0941	0.0021	0.31056	0.0588	0.0019	580	12	584	72	100.52
AMA-04-16	66.8	169.3	2.53443	0.895	0.042	0.1014	0.0021	0.36421	0.0641	0.0031	623	13	710	100	97.1919
AMA-04-17	122.3	78.6	0.642682	0.811	0.029	0.0977	0.0023	0.074973	0.0608	0.0024	601	14	632	90	99.6683
AMA-04-18	321	242.1	0.754206	0.829	0.025	0.0981	0.002	0.32102	0.0617	0.0018	603	12	651	61	98.6907
AMA-04-19	178.5	138.3	0.77479	0.78	0.023	0.0948	0.0018	0.29447	0.0593	0.0017	584	11	595	62	100
AMA-04-20	331	214	0.646526	0.818	0.018	0.0981	0.0016	0.1618	0.0612	0.0014	602.9	9.5	644	51	99.1612
AMA-04-21	244.5	204.5	0.836401	0.765	0.018	0.0942	0.0023	0.39931	0.0603	0.0014	580	13	614	55	100.52
AMA-04-22	79.6	124.2	1.5603	0.846	0.032	0.0981	0.0019	0.016352	0.0636	0.0028	603	11	723	90	96.7897
AMA-04-23	248.3	193.6	0.779702	0.742	0.019	0.0934	0.0017	0.44432	0.0584	0.0014	575.5	9.9	531	54	102.22
AMA-04-24	135.9	94.2	0.693157	0.791	0.025	0.0959	0.002	0.33857	0.0601	0.002	590	12	633	68	100
AMA-04-25	95.9	59.6	0.621481	0.806	0.031	0.1004	0.0025	0.21995	0.058	0.0024	617	15	532	91	102.833
AMA-04-26	149	97.1	0.651678	0.835	0.023	0.0991	0.0021	0.044999	0.0609	0.0022	609	12	642	75	99.0244
AMA-04-27	337.2	175.7	0.521056	0.863	0.019	0.1041	0.0018	0.40689	0.0605	0.0012	640	11	613	43	100.74
AMA-04-28	219.4	100.6	0.458523	1.333	0.028	0.1413	0.0024	0.41629	0.0693	0.0013	854	14	920	39	98.9571
AMA-04-29	84.5	51.9	0.614201	0.847	0.03	0.1019	0.0024	0.27085	0.0619	0.0024	625	14	670	82	99.0491
AMA-04-30	285	269	0.94386	0.799	0.02	0.0903	0.0014	0.5449	0.0601	0.0012	557.4	8.1	603	42	93.3668
AMA-04-31	179.4	150.1	0.836678	0.762	0.018	0.0962	0.0018	0.004717	0.0584	0.0017	592	10	532	66	102.778
AMA-04-32	101.4	65	0.641026	0.85	0.024	0.1048	0.0024	0.4496	0.06	0.0016	642	14	603	62	103.05
AMA-04-33	614	359	0.584691	0.3994	0.0098	0.0554	0.0012	0.21154	0.0529	0.0015	347.7	7	309	62	102.025
AMA-04-34	95	53.8	0.566316	0.885	0.037	0.1038	0.002	0.25794	0.0621	0.0026	636	12	652	89	98.9114
AMA-04-35	271	243	0.896679	0.857	0.02	0.0951	0.0016	0.41473	0.0609	0.0013	585.4	9.6	636	48	92.7734
AMA-04-36	36.7	32.9	0.896458	1.113	0.062	0.1257	0.004	0.26348	0.066	0.004	763	23	750	130	100.66
AMA-04-37	253.3	205.6	0.811686	0.739	0.021	0.0904	0.0017	0.24177	0.0595	0.0016	557.8	9.8	577	58	99.2527
AMA-04-38	21.59	25.16	1.16535	1.629	0.087	0.1649	0.0044	0.24151	0.0738	0.0044	983	24	1030	120	100.102
AMA-04-39	60.1	88.3	1.46922	6.74	0.16	0.3826	0.009	0.53892	0.1277	0.0029	2086	42	2063	39	100.385
AMA-04-40	15.6	22.65	1.45192	15.41	0.41	0.568	0.015	0.5305	0.1983	0.0054	2895	60	2801	45	101.937
AMA-04-41	13.71	21.22	1.54778	15.05	0.39	0.537	0.012	0.3669	0.2037	0.006	2769	51	2856	49	98.4009
AMA-04-42	377	121	0.320955	0.604	0.019	0.078	0.0019	0.39275	0.0552	0.0017	484	11	429	67	100.833
AMA-04-43	77.6	107.9	1.39046	0.944	0.034	0.1093	0.0023	0.0034618	0.0616	0.0025	668	14	660	91	99.2571
AMA-04-44	350	155.7	0.444857	0.841	0.022	0.1024	0.0016	0.27365	0.0599	0.0016	628.5	9.6	582	58	101.535
AMA-04-45	101.7	207	2.0354	0.823	0.027	0.0986	0.0018	0.15984	0.0598	0.002	608	11	583	72	100
AMA-04-46	90	110.9	1.23222	0.858	0.03	0.0997	0.0019	0.40818	0.0622	0.0019	614	11	681	69	97.9266
AMA-04-47	35.5	27.64	0.778592	0.831	0.047	0.0948	0.0026	0.066146	0.0637	0.0036	584	15	740	120	94.8052
AMA-04-48	98.9	92.6	0.936299	4.007	0.092	0.2683	0.0051	0.42277	0.1079	0.0022	1531	26	1768	37	93.7538
AMA-04-49	185	11.47	0.062	7.19	0.18	0.381	0.0069	0.65134	0.136	0.0031	2080	32	2169	39	97.4695
AMA-04-50	139.4	87.9	0.63056	0.835	0.027	0.1	0.0024	0.15875	0.0603	0.0021	614	14	623	72	100
AMA-04-51	94.9	68.4	0.720759	0.867	0.029	0.1056	0.0022	0.17028	0.0592	0.002	647	13	569	73	102.05
AMA-04-52	158.5	186.7	1.17792	6.73	0.11	0.3784	0.0071	0.59454	0.1279	0.0021	2067	33	2065	29	99.5185
AMA-04-53	183	354	1.93443	1.679	0.04	0.1534	0.003	0.43538	0.0732	0.0017	920	16	1015	47	91.5423
AMA-04-54	373	147	0.394102	2.315	0.045	0.2035	0.0041	0.46143	0.0821	0.0016	1194	22	1250	40	98.2716
AMA-04-55	177.2	91.2	0.514673	10.74	0.15	0.4502	0.0063	0.53767	0.1724	0.0025	2395	28	2578	24	95.8
AMA-04-56	22.95	16.91	0.736819	0.834	0.055	0.1009	0.0031	2.7778e-05	0.0609	0.0045	622	18	590	150	101.468
AMA-04-57	97.9	94.8	0.968335	6.1	0.12	0.3569	0.0065	0.49579	0.1229	0.0021	1966	31	2002	31	98.6948
AMA-04-58	451.5	403.9	0.894574	0.81	0.014	0.0967	0.0012	0.13035	0.0606	0.0012	595	7.3	618	41	98.8536
AMA-04-59	244.2	156.1	0.63923	0.824	0.021	0.0976	0.0017	0.37446	0.0599	0.0015	600.2	9.7	611	50	98.2324
AMA-04-60	50.1	43.3	0.864271	0.803	0.037	0.0993	0.0022	0.25098	0.0587	0.0027	610	13	539	99	102.521
AMA-04-61	26.83	18.14	0.676109	0.795	0.054	0.0946	0.0033	0.056547	0.0618	0.0043	582	20	590	150	96.3576
AMA-04-62	342.6	343	1.00117	0.621	0.013	0.0809	0.0013	0.4495	0.0554	0.0011	501.3	7.6	431	44	102.015
AMA-04-63	86.6	56.6	0.65358	0.752	0.034	0.0921	0.0025	0.2813	0.0585	0.0027	568	15	566	91	99.8243
AMA-04-64	93	87.5	0.94086	0.858	0.033	0.1024	0.0019	0.10146	0.0607	0.0024	628	11	605	90	99.841
AMA-04-65	104.6	98.2	0.938815	0.83	0.023	0.1001	0.0018	0.27661	0.0595	0.0016	615	10	576	62	100.163
AMA-04-66	120.4	81.1	0.673588	0.88	0.024	0.1035	0.0019	0.31976	0.0605	0.0018	635	11	620	61	99.2188
AMA-04-67	441	558	1.26531	0.519	0.016	0.0502	0.0017	0.60653	0.0739	0.002	317	10	1047	51	74.9409
AMA-04-68	288.1	282.1	0.979174	2.772	0.043	0.2326	0.0029	0.56095	0.0855	0.0011	1348	15	1323	25	100.074
AMA-04-69	401	192	0.478803	0.859	0.021	0.0968	0.0021	0.59877	0.0653	0.0013	595	12	789	41	94.2948
AMA-04-70	89.7	45.04	0.502118	1.55	0.048	0.1561	0.0031	0.34592	0.0709	0.002	937	18	937	57	98.5279
AMA-04-71	212.4	66.1	0.311205	2.35	0.052	0.1522	0.0028	0.72659	0.1099	0.0018	913	16	1801	32	74.3485
AMA-04-72	119.3	101.1	0.847443	5.308	0.092	0.3284	0.0058	0.58681	0.1171	0.0017	1830	28	1909	25	97.9657
AMA-04-73	159.4	73.9	0.463614	2.108	0.037	0.1951	0.0034	0.52217	0.0776	0.0014	1149	18	1129	36	99.913
AMA-04-74	198.3	103.3	0.520928	0.773	0.021	0.0958	0.0019	0.48885	0.0578	0.0014	593	10	515	53	101.89
AMA-04-75	477	289	0.60587	0.879	0.024	0.1066	0.0027	0.7057	0.0599	0.001	653	15	598	37	101.713
AMA-04-76	150.6	94.4	0.626826	0.785	0.02	0.0931	0.0016	0.025202	0.0594	0.0018	573.8	9.7	588	68	97.7513
AMA-04-77	138.9	204.1	1.4694	0.876	0.029	0.1031	0.0021	0.37177	0.0612	0.0019	634	13	653	66	99.2175
AMA-04-78	259.9	893	3.43594	0.794	0.016	0.0965	0.0016	0.17131	0.0593	0.0015	593.6	9.4	580	52	100.101
AMA-04-79	360	179.4	0.498333	0.782	0.016	0.0939	0.0016	0.36326	0.0603	0.0014	578.2	9.1	603	51	98.4505
AMA-04-80	240.5	101.1	0.420374	0.856	0.021	0.0996	0.0017	0.29472	0.0613	0.0015	612	9.8	650	54	97.6077
AMA-04-81	139.4	80.5	0.577475	0.848	0.022	0.1011	0.0024	0.36834	0.0612	0.0016	621	14	628	58	99.8392
AMA-04-82	74.4	45	0.604839	2.793	0.066	0.2302	0.004	0.15926	0.0874	0.0022	1335	21	1364	48	98.8157
AMA-04-83	392	207.5	0.529337	3.425	0.074	0.225	0.0045	0.70244	0.1101	0.0018	1307	24	1797	31	86.499
AMA-04-84	313	206	0.658147	0.846	0.018	0.1007	0.0019	0.43733	0.0602	0.0013	618	11	600	47	99.1974
AMA-04-85	209.9	165.8	0.7899	0.842	0.026	0.1034	0.0022	0.47586	0.0583	0.0017	634	13	538	66	102.093
AMA-04-86	290.2	194.2	0.669194	0.816	0.019	0.0958	0.0016	0.47214	0.062	0.0014	589.4	9.3	671	47	97.1005
AMA-04-87	78.2	91.5	1.17008	4.36	0.1	0.2904	0.0063	0.48731	0.1073	0.0023	1642	31	1765	43	96.305
AMA-04-88	198.1	178.3	0.90005	0.854	0.028	0.1022	0.002	0.45752	0.0611	0.0015	627	11	638	54	100.32
AMA-04-89	36.4	17.47	0.479945	0.784	0.043	0.093	0.0023	0.11588	0.06	0.0036	573	14	580	130	98.2847
AMA-04-90	226.7	100.5	0.443317	0.838	0.023	0.0992	0.0023	0.33305	0.06	0.0017	609	13	594	61	98.3845
AMA-04-91	273.6	217.3	0.794225	0.828	0.018	0.0979	0.0016	0.28897	0.0605	0.0013	601.7	9.2	621	48	98.3813
AMA-04-92	383	302.6	0.790078	0.878	0.02	0.1035	0.0016	0.4935	0.0608	0.0011	635	9.6	639	38	99.374
AMA-04-93	138.3	73.7	0.532899	0.714	0.022	0.0893	0.0016	0.090783	0.0583	0.002	551.4	9.5	547	77	100.989
AMA-04-94	137.5	53.8	0.391273	2.606	0.049	0.2237	0.0043	0.46057	0.0845	0.0016	1304	22	1298	37	100.077
AMA-04-95	394	492.1	1.24898	0.846	0.016	0.1011	0.0017	0.28549	0.0607	0.0014	620.5	9.7	630	48	99.823
AMA-04-96	121.6	118.3	0.972862	1.876	0.05	0.1777	0.0033	0.5077	0.0759	0.0019	1054	18	1079	50	98.2293
AMA-04-97	130.9	183.8	1.40413	0.831	0.028	0.0975	0.0021	0.24778	0.0612	0.0022	599	13	631	77	97.8758
AMA-04-98	209.4	238.1	1.13706	4.86	0.1	0.3116	0.0073	0.5828	0.1132	0.0023	1752	36	1860	33	97.6589
AMA-04-99	254	47	0.185039	0.869	0.021	0.0932	0.0019	0.42542	0.062	0.0016	574	11	660	55	90.2516
AMA-04-100	91.2	55.4	0.607456	0.854	0.034	0.1031	0.0022	0.25068	0.0598	0.0024	632	13	597	88	101.282
AMA-04-101	167.3	198.2	1.1847	0.825	0.021	0.0993	0.0021	0.20449	0.0607	0.002	610	12	611	69	100
AMA-04-102	141.4	269.4	1.90523	0.788	0.025	0.0963	0.0019	0.26084	0.0603	0.002	593	11	599	78	100.679
AMA-04-103	342.9	378.2	1.10295	3.809	0.053	0.2752	0.0051	0.55564	0.1	0.0014	1566	26	1624	27	98.1818
AMA-04-104	173.8	262.6	1.51093	0.844	0.026	0.1005	0.0018	0.30264	0.0604	0.0019	618	10	621	70	99.6774
AMA-04-105	230	155	0.673913	0.826	0.018	0.0994	0.0017	0.18921	0.0601	0.0016	611	10	591	57	100.164
AMA-04-106	473	190	0.401691	6.2	0.11	0.3623	0.0071	0.722	0.1268	0.0019	1992	33	2057	27	99.2526
AMA-04-107	259.7	132.2	0.509049	0.505	0.017	0.066	0.0014	0.34983	0.0563	0.0019	413.1	8.4	459	79	99.7826
AMA-04-108	108.6	123.2	1.13444	0.786	0.027	0.0965	0.0018	0.22566	0.0595	0.0022	594	11	564	80	101.193
AMA-04-109	377.2	326.7	0.866119	0.868	0.023	0.1046	0.0022	0.49274	0.0603	0.0015	641	13	624	53	101.264
AMA-04-110	132.1	99.8	0.755488	1.075	0.032	0.1209	0.0027	0.2724	0.0651	0.002	736	15	775	65	99.3252
AMA-04-111	195	189.4	0.971282	0.837	0.03	0.0961	0.0022	0.50259	0.0635	0.002	592	13	731	65	96.2602
AMA-04-112	220.5	161.7	0.733333	0.797	0.019	0.0984	0.002	0.32425	0.0588	0.0014	606	12	562	53	102.02
AMA-04-113	899	403.8	0.449166	0.791	0.015	0.099	0.0014	0.61796	0.05868	0.00086	608.3	8	550	32	102.927
AMA-04-114	370	488	1.31892	0.879	0.02	0.1075	0.0024	0.50146	0.061	0.0014	658	14	635	46	102.812
AMA-04-115	335.3	340.7	1.0161	1.226	0.039	0.1278	0.0028	0.73282	0.0707	0.0016	775	16	939	45	95.679
AMA-04-116	110.1	113.3	1.02906	0.909	0.032	0.112	0.0021	0.32198	0.0606	0.0018	684	12	614	70	104.11
AMA-04-117	109.7	65.8	0.599818	0.749	0.026	0.0911	0.0022	0.17845	0.061	0.0022	562	13	620	80	98.9437
AMA-04-118	60	55.2	0.92	1.102	0.06	0.121	0.0028	0.12177	0.0679	0.004	736	16	820	120	97.3545
AMA-04-119	201	223	1.10945	0.824	0.021	0.0981	0.0014	0.29055	0.0619	0.0016	603.4	8.3	664	55	98.7561
AMA-04-120	332.5	143.7	0.43218	0.816	0.018	0.1002	0.0016	0.33244	0.0596	0.0013	615.2	9.1	595	47	101.686
AMA-04-121	73.5	41.61	0.566122	0.853	0.035	0.1029	0.0025	0.28172	0.0605	0.0024	631	14	618	89	101.284
AMA-04-122	172.5	137.1	0.794783	0.791	0.021	0.0957	0.0017	0.25574	0.0601	0.0016	588.9	9.8	596	61	99.4764
AMA-04-123	366	81.8	0.223497	0.81	0.021	0.097	0.002	0.47078	0.0611	0.0015	597	12	643	51	99.1694
AMA-04-124	438	741	1.69178	0.891	0.026	0.1094	0.0032	0.67424	0.0602	0.0013	669	19	613	49	102.923
AMA-04-125	91.4	53.28	0.582932	2.184	0.057	0.2029	0.0039	0.12923	0.0789	0.0024	1190	21	1174	63	101.19
AMA-04-126	437	259.6	0.59405	0.889	0.019	0.1041	0.0019	0.4851	0.0621	0.0012	638	11	675	42	98.9147
AMA-04-127	380.7	246	0.646178	3.07	0.11	0.2197	0.0073	0.89895	0.1014	0.0018	1279	38	1650	32	90.007
AMA-04-128	320.9	175.4	0.546588	6.08	0.11	0.3331	0.0062	0.57148	0.1306	0.0019	1856	29	2106	26	93.5013
AMA-04-129	290	187	0.644828	0.774	0.023	0.0929	0.0019	0.50298	0.0611	0.0014	572	11	657	49	98.1132
AMA-04-130	118.7	109.4	0.921651	0.773	0.026	0.0931	0.0021	0.43759	0.0597	0.0019	574	13	571	69	98.6254
AMA-04-131	167	93.5	0.55988	0.861	0.025	0.1008	0.0018	0.32001	0.061	0.0019	619	11	636	69	98.0983
AMA-04-132	98.4	71.6	0.727642	0.783	0.027	0.0939	0.0018	0.3554	0.0592	0.0019	578	11	571	68	98.8034
AMA-04-133	186.8	64.6	0.345824	0.783	0.022	0.0935	0.0019	0.19092	0.0587	0.0018	576	11	589	68	97.6271
AMA-04-134	124.7	96.6	0.774659	5.78	0.11	0.3423	0.0058	0.54334	0.1201	0.002	1897	28	1967	31	97.7331
AMA-04-135	158.8	102.2	0.643577	11.95	0.22	0.4726	0.0093	0.63784	0.1786	0.0029	2499	42	2640	27	96.1894

## Sheet: Table 4- sample Ama-5
	U	Th	Th/U	207Pb/235U	2sigma err	206Pb/238U	2sigma err	Rho	207Pb/206Pb	2sigma err	206Pb/238Uage	2sigma err	207Pb/206Pbage	2sigma err	%Conc.
AMA-05-1	360	115	0.319444	0.725	0.015	0.0886	0.0013	0.34388	0.0598	0.0012	546.9	7.5	586	43	98.6828
AMA-05-2	135	245.9	1.82148	3.972	0.053	0.2709	0.004	0.47294	0.1063	0.0016	1548	20	1737	26	95.0276
AMA-05-3	24.84	31.59	1.27174	1.874	0.094	0.1755	0.0034	0.0048284	0.0776	0.0042	1042	19	1090	110	97.9323
AMA-05-4	336	59	0.175595	1.011	0.019	0.1181	0.0018	0.61101	0.0621	0.0011	719	11	690	35	101.482
AMA-05-5	70.6	68.5	0.970255	6.55	0.14	0.3688	0.006	0.64952	0.1282	0.0021	2023	28	2064	27	98.6829
AMA-05-6	78.8	85.4	1.08376	0.788	0.034	0.0942	0.0016	0.23925	0.0601	0.0025	580.4	9.6	611	86	98.3729
AMA-05-7	83.9	93.8	1.118	0.886	0.031	0.104	0.0017	0.16934	0.061	0.0022	638	10	643	77	99.3769
AMA-05-8	547	326	0.595978	13.17	0.42	0.406	0.012	0.96239	0.2278	0.0029	2194	54	3037	20	81.7132
AMA-05-9	352	366	1.03977	0.878	0.04	0.0938	0.0013	0.50633	0.0652	0.0024	577.6	7.8	778	78	90.25
AMA-05-10	119.5	111.6	0.933891	0.886	0.024	0.1006	0.0017	0.32553	0.0632	0.0018	618	10	705	58	95.814
AMA-05-11	198.2	74.4	0.375378	5.884	0.077	0.3361	0.0049	0.54339	0.1242	0.0016	1867	24	2018	22	95.3524
AMA-05-12	79.5	45.65	0.574214	6.18	0.13	0.3467	0.006	0.64989	0.1277	0.0019	1921	29	2063	26	95.6197
AMA-05-13	349	413	1.18338	0.82	0.012	0.0972	0.0011	0.46096	0.06102	0.00074	597.9	6.5	637	26	98.3712
AMA-05-14	179.3	164.8	0.91913	0.822	0.019	0.0984	0.0013	0.20761	0.0596	0.0015	604.7	7.8	583	56	99.4572
AMA-05-15	278	309	1.11151	0.847	0.018	0.0974	0.0013	0.46662	0.0614	0.0012	599.3	7.5	643	43	96.3505
AMA-05-16	428	132.9	0.310514	1.035	0.02	0.1127	0.0019	0.62605	0.06483	0.00099	688	11	764	32	95.4495
AMA-05-17	338	470	1.39053	0.871	0.019	0.103	0.0016	0.48843	0.0613	0.0013	632	9.4	637	47	98.9045
AMA-05-18	168.9	82.1	0.486086	0.75	0.019	0.0913	0.0012	0.32382	0.059	0.0015	563.1	6.8	560	52	99.3122
AMA-05-19	210.6	89.7	0.425926	0.857	0.018	0.0987	0.0016	0.44477	0.0616	0.0014	606.8	9.2	662	47	96.6396
AMA-05-20	319	87.8	0.275235	5.639	0.094	0.326	0.0051	0.81212	0.1232	0.0011	1818	25	2005	17	94.5398
AMA-05-21	156.2	157.8	1.01024	0.885	0.024	0.1016	0.0018	0.21865	0.0623	0.0017	625	11	666	60	97.2006
AMA-05-22	182.5	82.1	0.449863	0.8	0.02	0.096	0.0015	0.26916	0.0601	0.0016	590.7	8.7	589	58	99.1107
AMA-05-23	79	43.5	0.550633	0.793	0.027	0.0937	0.0013	0.12375	0.0614	0.002	577.5	7.9	638	71	97.7157
AMA-05-24	371	342	0.921833	0.871	0.016	0.1017	0.001	0.12203	0.062	0.0011	624.6	5.9	673	39	98.2539
AMA-05-25	100.2	72.6	0.724551	3.68	0.061	0.2791	0.0031	0.40078	0.0962	0.0016	1589	16	1551	32	101.339
AMA-05-26	279	152	0.544803	0.861	0.017	0.1044	0.0015	0.37971	0.0598	0.0011	640.1	8.7	596	40	101.426
AMA-05-27	271	46.73	0.172435	0.795	0.016	0.0973	0.0013	0.35615	0.0598	0.0012	598.4	7.7	598	45	100.826
AMA-05-28	118.2	97.5	0.824873	0.759	0.028	0.0921	0.0015	0.25579	0.0592	0.0021	567.7	8.7	577	77	99.2483
AMA-05-29	91.3	84.2	0.922234	0.751	0.02	0.0927	0.0015	0.09775	0.0588	0.0021	571.4	8.8	545	77	100.246
AMA-05-30	222.3	134.1	0.603239	0.828	0.018	0.0999	0.0014	0.30864	0.0613	0.0014	614	7.9	658	51	100.13
AMA-05-31	53.65	39.64	0.738863	1.124	0.062	0.1182	0.002	0.21655	0.0714	0.0037	721	11	970	100	94.1253
AMA-05-32	62.3	23.4	0.375602	2.47	0.058	0.2157	0.0034	0.36478	0.0847	0.002	1261	18	1298	45	100
AMA-05-33	85.8	55.6	0.648019	2.62	0.061	0.2219	0.0032	0.32925	0.0869	0.002	1292	17	1348	45	99.0798
AMA-05-34	296.6	147.8	0.498314	0.816	0.014	0.0997	0.0011	0.28503	0.05959	0.00096	612.5	6.6	589	36	101.206
AMA-05-35	83.1	41.32	0.497232	0.885	0.028	0.1057	0.0017	0.28109	0.0618	0.002	647.6	9.8	665	68	100.872
AMA-05-36	201.2	275	1.3668	0.893	0.02	0.1037	0.0014	0.2617	0.0634	0.0015	636.3	8	707	52	98.0431
AMA-05-37	94.1	94	0.998937	0.872	0.029	0.1055	0.0015	0.1491	0.061	0.0021	646.7	8.8	613	75	101.523
AMA-05-38	186.7	146.4	0.784146	0.87	0.018	0.1032	0.0014	0.16555	0.0612	0.0016	633.1	8.4	630	54	99.7008
AMA-05-39	353	118.4	0.335411	1.73	0.035	0.1709	0.0026	0.61152	0.0748	0.0013	1017	14	1058	34	99.9018
AMA-05-40	177.1	58.5	0.330322	0.751	0.016	0.094	0.0015	0.15245	0.0594	0.0014	579	8.9	578	52	101.883
AMA-05-41	137.9	187.7	1.36113	0.855	0.02	0.096	0.0015	0.13332	0.0622	0.0016	590.6	9.1	665	54	94.345
AMA-05-42	519	420	0.809249	1.827	0.028	0.1701	0.002	0.49446	0.0784	0.0011	1013	11	1157	30	95.928
AMA-05-43	154	138	0.896104	0.912	0.021	0.1071	0.0016	0.070012	0.0633	0.0017	655.6	9.4	699	60	99.7869
AMA-05-44	333.9	192	0.575022	0.758	0.012	0.094	0.0011	0.42451	0.05921	0.00089	579.1	6.5	580	33	101.171
AMA-05-45	302	176.9	0.585762	0.447	0.01	0.06126	0.00088	0.33374	0.0536	0.0012	383.2	5.4	345	50	102.159
AMA-05-46	660	43.6	0.0660606	0.804	0.012	0.0983	0.0012	0.22791	0.05988	0.00096	604.5	7.1	593	35	100.935
AMA-05-47	430	404	0.939535	0.817	0.015	0.099	0.0012	0.35784	0.0609	0.0011	608.6	7	632	38	100.462
AMA-05-48	380	208.4	0.548421	0.99	0.022	0.1161	0.0023	0.62981	0.0629	0.0011	708	13	703	38	101.143
AMA-05-49	66.6	74	1.11111	0.865	0.031	0.1028	0.0018	0.25475	0.0612	0.0021	631	11	638	73	100.159
AMA-05-50	144.3	61.7	0.427581	0.838	0.018	0.1014	0.0014	0.16161	0.0601	0.0015	622.8	8.4	599	58	100.614
AMA-05-51	142.3	79.3	0.557273	3.554	0.064	0.2719	0.0041	0.51462	0.0967	0.0016	1550	21	1557	32	100.78
AMA-05-52	186.6	122.9	0.658628	0.832	0.02	0.1017	0.0013	0.27484	0.0598	0.0015	624.5	7.9	601	53	101.71
AMA-05-53	86.4	84	0.972222	0.864	0.031	0.1057	0.0015	0.068793	0.0604	0.0023	648.8	8.7	601	85	102.984
AMA-05-54	123.1	30.3	0.246141	7.79	0.12	0.381	0.0042	0.60554	0.1515	0.0017	2081	20	2361	19	94.3336
AMA-05-55	32.35	31.7	0.979907	0.799	0.038	0.0937	0.0025	0.15354	0.0619	0.0031	577	14	640	110	97.3019
AMA-05-56	184.2	145.3	0.788817	0.495	0.015	0.06624	0.00082	0.38434	0.0548	0.0016	413.4	5	384	65	101.076
AMA-05-57	118.3	113.3	0.957735	0.778	0.02	0.0981	0.0018	0.20048	0.0586	0.0018	603	10	559	64	103.431
AMA-05-58	134.5	77.53	0.576431	0.882	0.023	0.1049	0.0016	0.27129	0.0617	0.0016	643.1	9.5	655	57	100.328
AMA-05-59	347	88.2	0.254179	0.876	0.017	0.1068	0.0017	0.59658	0.06026	0.00094	653.9	9.7	612	34	102.044
AMA-05-60	299	18.12	0.060602	1.395	0.037	0.1349	0.0023	0.79009	0.0749	0.0012	815	13	1070	35	92.0904
AMA-05-61	166.6	197.1	1.18307	6.234	0.071	0.3683	0.0035	0.35809	0.1243	0.0015	2021	17	2017	21	100.627
AMA-05-62	229.3	208.9	0.911034	0.79	0.019	0.0964	0.0013	0.35636	0.0594	0.0014	593.1	7.5	586	51	100.186
AMA-05-63	336.8	260.2	0.772565	0.837	0.02	0.1003	0.0013	0.50699	0.0613	0.0011	616.3	7.4	648	40	99.5638
AMA-05-64	290	96.6	0.333103	6.82	0.13	0.3911	0.0065	0.82545	0.1263	0.0013	2131	31	2046	18	102.059
AMA-05-65	124.9	79.8	0.638911	0.825	0.027	0.1006	0.0018	0.3789	0.0609	0.0018	618	11	613	66	101.478
AMA-05-66	39.23	50.4	1.28473	0.771	0.042	0.0976	0.0021	0.096	0.0595	0.0034	600	12	530	120	103.093
AMA-05-67	438	118.8	0.271233	0.92	0.02	0.1072	0.0015	0.58301	0.0625	0.0011	656.2	9	690	38	99.1239
AMA-05-68	81.8	56.8	0.694377	7.351	0.091	0.3994	0.0053	0.47454	0.1353	0.0019	2166	24	2168	25	100.557
AMA-05-69	141.8	189.6	1.33709	3.31	0.049	0.2617	0.0031	0.51639	0.0921	0.0013	1498	16	1467	26	100.943
AMA-05-70	267	217	0.812734	0.861	0.015	0.1016	0.0014	0.3499	0.0619	0.0011	623.5	8.3	664	39	98.9055
AMA-05-71	19.4	11.48	0.591753	0.83	0.062	0.0976	0.0027	0.063315	0.0616	0.0047	600	16	590	160	99.1736
AMA-05-72	242.7	2.64	0.0108776	0.857	0.016	0.1015	0.0013	0.37863	0.0605	0.0011	623.3	7.6	620	40	99.0466
AMA-05-73	224.6	69.3	0.308549	6.345	0.078	0.37	0.0047	0.45906	0.1249	0.0016	2029	22	2028	23	100.247
AMA-05-74	68.2	26.13	0.383138	2.377	0.058	0.2116	0.0028	0.24213	0.0807	0.002	1237	15	1209	48	99.9192
AMA-05-75	96.5	100.7	1.04352	0.796	0.032	0.0979	0.0016	0.21621	0.0597	0.0022	602.2	9.5	562	81	100.871
AMA-05-76	65.3	22.81	0.349311	1.582	0.048	0.1541	0.003	0.42871	0.0739	0.0022	926	17	1036	61	96.358
AMA-05-77	168	135.8	0.808333	0.835	0.02	0.1011	0.0013	0.31443	0.0604	0.0014	621	7.4	628	48	100.648
AMA-05-78	75.9	53.47	0.70448	1.013	0.035	0.1094	0.0017	0.10275	0.0635	0.0022	669.4	9.9	732	71	94.2817
AMA-05-79	39.2	29.4	0.75	8.73	0.25	0.3994	0.0076	0.54036	0.1574	0.0041	2165	35	2429	45	93.5205
AMA-05-80	80.7	73.8	0.914498	0.762	0.026	0.0926	0.0016	0.01977	0.0592	0.0022	570.5	9.2	584	78	98.7024
AMA-05-81	60.1	68	1.13145	2.652	0.097	0.2157	0.0056	0.61979	0.09	0.0025	1258	30	1427	50	95.5201
AMA-05-82	270.6	160.5	0.593126	0.783	0.018	0.0956	0.001	0.26006	0.0596	0.0015	588.4	6.1	580	53	100.068
AMA-05-83	339	103.8	0.306195	0.831	0.018	0.1008	0.0012	0.28629	0.0599	0.0012	618.8	7.2	589	45	100.651
AMA-05-84	137	51.7	0.377372	0.77	0.017	0.0953	0.0016	0.23202	0.0587	0.0016	586.9	9.5	545	61	101.347
AMA-05-85	66.94	75.5	1.12788	0.877	0.029	0.1024	0.0017	0.046677	0.062	0.0024	628	10	663	88	98.4326
AMA-05-86	301.7	439	1.45509	0.803	0.015	0.094	0.0013	0.50851	0.0602	0.001	579	7.6	615	38	96.5644
AMA-05-87	89.7	41.8	0.465998	0.756	0.023	0.0942	0.0018	0.092288	0.0593	0.0022	580	10	601	79	101.754
AMA-05-88	291	117.1	0.402405	6.166	0.059	0.3404	0.0035	0.65575	0.1282	0.0011	1888	17	2072	15	94.4425
AMA-05-89	170.5	46.5	0.272727	6.403	0.072	0.3646	0.0041	0.45668	0.1291	0.0016	2006	19	2086	22	98.7205
AMA-05-90	109.6	143.1	1.30566	0.77	0.028	0.096	0.0015	0.0294	0.0585	0.0023	590.9	8.6	553	86	101.529
AMA-05-91	42.38	37.83	0.892638	0.886	0.045	0.1051	0.0017	0.20585	0.0625	0.0032	644	10	670	100	100.156
AMA-05-92	146.1	76.7	0.524983	0.825	0.025	0.1039	0.0015	0.15397	0.0587	0.0018	637.3	8.7	544	68	104.134
AMA-05-93	128.6	100.6	0.782271	0.811	0.027	0.1011	0.0013	0.011186	0.0585	0.002	621	7.5	518	77	102.645
AMA-05-94	279.8	40.78	0.145747	3.576	0.058	0.2336	0.0035	0.63984	0.1126	0.0014	1353	18	1840	23	87.5728
AMA-05-95	112	99.4	0.8875	3.429	0.067	0.2664	0.0035	0.44825	0.0949	0.0017	1522	18	1519	35	100.861
AMA-05-96	159.8	98.5	0.616395	1.319	0.079	0.126	0.002	0.42169	0.0767	0.0042	765	11	1100	110	90.5325
AMA-05-97	254	79.5	0.312992	2.653	0.051	0.2264	0.0036	0.82345	0.0859	0.0013	1315	19	1334	29	100.076
AMA-05-98	567.5	231	0.407048	1.73	0.032	0.1721	0.0028	0.71964	0.07281	0.00092	1024	15	1009	25	100.491
AMA-05-99	512.4	431.9	0.842896	5.155	0.051	0.3263	0.0036	0.55189	0.1146	0.0012	1820	17	1875	19	98.661
AMA-05-100	112.1	116	1.03479	0.845	0.029	0.1015	0.0016	0.097804	0.0613	0.0023	623.3	9.1	664	77	100.532
AMA-05-101	57.4	45.8	0.797909	0.864	0.05	0.0967	0.0018	0.083825	0.0631	0.0038	595	11	750	130	93.2602
AMA-05-102	224.7	181.2	0.806409	0.772	0.019	0.0935	0.0014	0.25536	0.0599	0.0015	575.9	8.3	592	54	99.2931
AMA-05-103	145.5	82.9	0.569759	0.744	0.022	0.0934	0.0016	0.26008	0.0577	0.0016	575.8	9.3	526	59	102.274
AMA-05-104	229.4	149.4	0.651264	0.799	0.021	0.0964	0.0011	0.36317	0.0602	0.0015	593.1	6.5	620	54	99.6807
AMA-05-105	226.5	86.6	0.38234	5.955	0.097	0.3434	0.005	0.6205	0.125	0.0018	1906	24	2025	25	96.8496
AMA-05-106	223	57.8	0.259193	3.638	0.083	0.2504	0.0046	0.76711	0.1053	0.0015	1440	24	1719	28	92.6045
AMA-05-107	168.6	220	1.30486	0.751	0.021	0.0905	0.0012	0.13642	0.0603	0.0018	558.4	7.1	642	64	98.3099
AMA-05-108	121.6	165.9	1.36431	6.25	0.1	0.3624	0.0051	0.52386	0.1251	0.0017	1993	24	2034	24	99.1542
AMA-05-109	125.1	173.5	1.38689	6.239	0.09	0.3536	0.0046	0.62609	0.1278	0.0013	1951	22	2066	18	97.113
AMA-05-110	147.9	135.8	0.918188	0.78	0.022	0.0943	0.0015	0.017935	0.0605	0.0019	580.6	8.8	619	70	99.4178
AMA-05-111	330	128.8	0.390303	0.832	0.019	0.1006	0.0013	0.48132	0.0603	0.0012	617.7	7.5	604	44	100.603
AMA-05-112	157.8	48.6	0.307985	0.819	0.023	0.0966	0.0016	0.19273	0.0604	0.0019	594.1	9.4	615	67	98.0363
AMA-05-113	51.7	51.5	0.996132	0.77	0.031	0.0942	0.0019	0.028433	0.0602	0.0028	580	11	569	97	100.52
AMA-05-114	183.3	121.5	0.662848	1.594	0.035	0.1547	0.0021	0.55666	0.0743	0.0012	929	12	1060	33	95.9711
AMA-05-115	69.46	77	1.10855	0.811	0.035	0.0952	0.0014	0.19767	0.0609	0.0026	586.1	8.1	667	92	97.6833
AMA-05-116	84	47.5	0.565476	6.94	0.11	0.3748	0.0052	0.49136	0.1344	0.0018	2051	24	2156	24	97.481
AMA-05-117	375	98	0.261333	0.874	0.019	0.1031	0.0017	0.47857	0.0609	0.0013	632	10	625	45	99.2151
AMA-05-118	149.2	106	0.710456	0.857	0.027	0.095	0.0013	0.24136	0.0652	0.002	586.1	7.7	770	69	93.4769
AMA-05-119	41.21	26.01	0.631157	0.903	0.039	0.1024	0.002	0.15335	0.0637	0.0028	629	12	717	96	96.7692
AMA-05-120	222.9	265.6	1.19157	4.55	0.072	0.2894	0.004	0.59095	0.1135	0.0016	1638	20	1852	25	94.1921
AMA-05-121	73.62	66.8	0.907362	0.896	0.039	0.1037	0.0021	0.24426	0.0622	0.0026	636	12	667	91	97.9969
AMA-05-122	446	157.6	0.353363	6.263	0.062	0.3551	0.0041	0.63383	0.1271	0.0012	1962	20	2061	17	97.481
AMA-05-123	118.6	103.2	0.870152	0.859	0.024	0.1013	0.0016	0.26293	0.0611	0.0018	622	9.3	624	63	99.0446

## Sheet: Table 5- sample Sbm-6
	U	Th	Th/U	207Pb/235U	2sigma err	206Pb/238U	2sigma err	Rho	206Pb/238Uage	2sigma err	207Pb/206Pbage	2sigma err	%Conc.
SBM-6_1	461	329	0.713666	6.11	0.12	0.3594	0.0086	0.79523	1977	41	1996	28	99.2968
SBM-6_2	523	260	0.497132	13.98	0.29	0.512	0.013	0.71795	2661	56	2819	32	96.9046
SBM-6_3	61.9	66.5	1.07431	9.52	0.96	0.1783	0.0096	0.90443	1061	53	3773	88	45.439
SBM-6_4	99.3	110.3	1.11078	0.885	0.028	0.1072	0.0044	0.41965	656	26	620	82	101.548
SBM-6_5	192.5	258	1.34026	0.9	0.025	0.1074	0.0029	0.59147	658	17	672	59	101.075
SBM-6_6	436	121.7	0.279128	0.905	0.018	0.1068	0.0036	0.58824	654	21	668	57	100.015
SBM-6_7	358	503	1.40503	0.883	0.018	0.1061	0.0028	0.51745	650	16	615	51	100.9
SBM-6_8	230.3	297	1.28962	0.824	0.022	0.1004	0.0041	0.32844	616	24	610	90	100.654
SBM-6_9	266	290	1.09023	0.826	0.024	0.0999	0.0045	0.53688	613	26	638	91	100.327
SBM-6_10	132	63.1	0.47803	0.962	0.021	0.112	0.0035	0.48019	684	20	676	60	99.854
SBM-6_11	106.4	93.2	0.87594	0.778	0.029	0.0959	0.006	0.5467	590	35	640	110	99.8308
SBM-6_12	202.7	198.1	0.977306	0.794	0.022	0.0989	0.0039	0.52045	608	23	558	69	102.53
SBM-6_13	265	417	1.57358	4.03	0.16	0.27	0.014	0.62896	1538	72	1778	73	94.0098
SBM-6_14	282	44.4	0.157447	11.23	0.35	0.475	0.023	0.62481	2498	98	2587	63	98.2304
SBM-6_15	532	258	0.484962	15.63	0.24	0.557	0.013	0.48065	2850	52	2865	34	99.8948
SBM-6_16	602	685	1.13787	4.93	0.11	0.3064	0.0081	0.37808	1721	40	1918	48	95.2935
SBM-6_17	124.9	65.9	0.527622	0.283	0.013	0.0404	0.0018	0.65494	256	11	253	92	101.186
SBM-6_18	283	94.3	0.333216	12.54	0.33	0.484	0.014	0.64624	2541	61	2725	37	96.1771
SBM-6_19	479	208.6	0.435491	3.06	0.12	0.1972	0.0081	0.74694	1159	44	1853	57	81.5623
SBM-6_20	139	110	0.791367	1.039	0.028	0.118	0.0038	0.4151	719	22	768	58	99.3094
SBM-6_21	313	119.1	0.380511	0.842	0.023	0.1003	0.0031	0.46637	616	18	623	53	99.3548
SBM-6_22	320	226	0.70625	1.116	0.03	0.121	0.0048	0.6258	736	28	886	67	96.5879
SBM-6_23	42.6	37	0.868545	0.88	0.028	0.1057	0.0032	0.31452	647	19	665	75	100.622
SBM-6_24	160.1	154.2	0.963148	0.841	0.022	0.1001	0.0034	0.41955	614	20	645	69	99.1922
SBM-6_25	79.7	53.7	0.673777	1.402	0.04	0.1482	0.0052	0.48655	890	29	931	63	99.8878
SBM-6_26	16.86	6.39	0.379004	0.94	0.045	0.109	0.0042	0.24611	670	25	670	120	98.6745
SBM-6_27	77.5	69	0.890323	0.67	0.02	0.0831	0.0028	0.6112	514	17	569	70	98.8462
SBM-6_28	174.4	158.4	0.908257	0.845	0.023	0.1002	0.005	0.40584	615	30	640	100	99.0338
SBM-6_29	75.6	69.7	0.921958	0.674	0.027	0.0853	0.0039	0.34492	527	23	510	120	100.381
SBM-6_30	167.5	156.3	0.933134	0.876	0.022	0.1048	0.0036	0.66954	642	21	662	55	100.785
SBM-6_31	118.5	91.1	0.768776	12.16	0.25	0.492	0.016	0.75861	2572	67	2656	42	98.318
SBM-6_32	112.7	103.1	0.914818	0.752	0.026	0.0918	0.0036	0.50844	565	21	635	75	99.4718
SBM-6_33	164.5	47.5	0.288754	1.683	0.041	0.1681	0.0059	0.72295	1000	33	1019	51	100
SBM-6_34	145.5	124.7	0.857045	1.219	0.034	0.1341	0.005	0.45029	810	28	841	71	100.372
SBM-6_35	354	121.9	0.34435	5.69	0.11	0.328	0.012	0.48875	1826	57	2042	54	94.7095
SBM-6_36	323.3	298	0.921745	0.789	0.017	0.0962	0.003	0.5184	592	18	602	60	100.339
SBM-6_37	264.2	91.8	0.347464	2.709	0.066	0.2101	0.0066	0.68251	1228	35	1505	41	92.1922
SBM-6_38	643	1065	1.6563	0.73	0.016	0.0829	0.0027	0.43697	513	16	756	61	92.2496
SBM-6_39	78.6	41.3	0.525445	0.875	0.031	0.107	0.0042	0.23132	655	24	601	89	102.826
SBM-6_40	104	95	0.913462	0.846	0.032	0.1006	0.0042	0.33422	617	24	654	99	99.5161
SBM-6_41	79.2	68.8	0.868687	1.664	0.038	0.1658	0.0055	0.41387	988	30	1054	56	99.1968
SBM-6_42	454	385	0.848018	1.952	0.048	0.1777	0.0065	0.49259	1053	35	1181	67	95.8144
SBM-6_43	283.4	141.7	0.5	2.26	0.056	0.2043	0.0078	0.67014	1196	42	1209	57	99.8331
SBM-6_44	232.6	189	0.812554	1.567	0.047	0.1607	0.0061	0.64271	960	34	1011	59	100.209
SBM-6_45	151.6	53.4	0.352243	2.234	0.069	0.205	0.011	0.58913	1200	58	1210	80	100.251
SBM-6_46	188	203	1.07979	0.782	0.019	0.0961	0.0041	0.45336	591	24	575	80	100.853
SBM-6_47	301	292	0.9701	0.781	0.021	0.0954	0.0041	0.53991	587	24	617	85	100.171
SBM-6_48	141.4	195.5	1.3826	0.52	0.016	0.068	0.0026	0.51404	424	16	440	80	99.5305
SBM-6_49	158.5	382	2.41009	0.716	0.017	0.089	0.0031	0.50864	549	18	561	66	100.311
SBM-6_50	303.1	543	1.79149	0.795	0.027	0.0963	0.0052	0.37727	592	30	640	110	99.8314
SBM-6_51	203	179.5	0.884236	5.94	0.13	0.358	0.013	0.52264	1966	60	1982	53	99.9492
SBM-6_52	451	414	0.91796	0.796	0.021	0.0976	0.0045	0.62958	600	27	615	73	100.671
SBM-6_53	294	186	0.632653	0.796	0.025	0.0972	0.004	0.21086	597	24	590	100	100.675
SBM-6_54	341	170	0.498534	1.563	0.037	0.1538	0.0055	0.5324	925	31	1076	62	96.5553
SBM-6_55	166.3	135.6	0.815394	0.802	0.022	0.0971	0.0036	0.415	597	21	628	74	100
SBM-6_56	297	62.5	0.210438	5.51	0.13	0.342	0.012	0.77005	1897	58	1954	41	99.8421
SBM-6_57	294	360	1.22449	0.792	0.027	0.0986	0.0043	0.59251	605	25	585	67	102.024
SBM-6_58	428	247	0.577103	0.773	0.019	0.0952	0.0035	0.74809	585	21	623	63	100.688
SBM-6_59	491	277	0.564155	0.659	0.017	0.0842	0.0032	0.5587	521	19	525	70	101.559
SBM-6_60	624	316	0.50641	17.03	0.56	0.58	0.031	0.85159	2940	120	2971	68	100.204
SBM-6_61	373	120.7	0.323592	6.79	0.14	0.387	0.014	0.56057	2102	64	2100	51	100.961
SBM-6_62	131.8	172.1	1.30577	2.571	0.063	0.2192	0.0077	0.72043	1275	40	1340	59	98.8372
SBM-6_63	188.5	190.1	1.00849	0.764	0.027	0.0954	0.0045	0.49359	587	26	608	87	102.087
SBM-6_64	39	21	0.538462	11.99	0.91	0.506	0.034	0.63695	2710	170	2500	110	104.674
SBM-6_65	13.6	8.5	0.625	0.831	0.054	0.1013	0.0044	0.14487	621	26	580	150	100
SBM-6_66	448.2	266.5	0.594601	0.771	0.013	0.094	0.0016	0.60102	579.1	9.5	617	41	99.8276
SBM-6_67	55.7	77.6	1.39318	5.73	0.11	0.349	0.01	0.53078	1925	48	1962	49	99.5346
SBM-6_68	1533	1519	0.990868	0.724	0.014	0.0888	0.0027	0.72702	548	16	596	50	99.2214
SBM-6_69	167	49	0.293413	15.3	0.31	0.545	0.018	0.73153	2807	74	2851	40	99.1522
SBM-6_70	186.1	186.1	1	0.83	0.019	0.0988	0.0028	0.56891	607	16	612	59	99.0212
SBM-6_71	571	190.2	0.3331	2.28	0.048	0.2039	0.0067	0.70464	1194	36	1204	51	99.005
SBM-6_72	298.5	229.7	0.769514	0.713	0.014	0.0874	0.0018	0.75015	540	11	593	44	98.9736
SBM-6_73	186.3	96	0.515298	0.77	0.02	0.0932	0.0033	0.53278	574	19	608	67	98.9655
SBM-6_74	380.9	270.8	0.710948	0.75	0.019	0.0909	0.0031	0.56597	560	19	620	66	98.7654
SBM-6_75	301.2	149.5	0.496348	0.777	0.019	0.0934	0.0028	0.67478	575	17	620	59	98.6278
SBM-6_76	129.6	75	0.578704	1.011	0.031	0.1142	0.0042	0.61412	696	24	753	71	98.1664
SBM-6_77	661	476	0.720121	5.97	0.11	0.349	0.012	0.79555	1931	58	2003	43	98.0701
SBM-6_78	185.7	150.4	0.809908	7.69	0.18	0.397	0.014	0.78661	2150	64	2218	46	97.9945
SBM-6_79	352	306	0.869318	1.157	0.023	0.126	0.004	0.60856	764	23	800	58	97.9487
SBM-6_80	201.7	146.1	0.724343	0.772	0.02	0.0923	0.0027	0.38415	569	16	620	71	97.9346
SBM-6_81	291	291	1	0.985	0.017	0.111	0.0017	0.63301	678	10	747	32	97.4558
SBM-6_82	93.8	72.6	0.773987	0.911	0.031	0.1042	0.0043	0.73804	638	25	680	69	97.4046
SBM-6_83	415	413	0.995181	0.71	0.019	0.0861	0.0032	0.74753	532	19	582	66	97.2578
SBM-6_84	23.2	10.6	0.456897	0.911	0.045	0.1044	0.0039	0.20017	640	23	640	120	97.1168
SBM-6_85	501	255	0.508982	7.25	0.14	0.38	0.014	0.74572	2073	63	2213	49	96.8239
SBM-6_86	214.6	111.7	0.520503	1.608	0.04	0.1572	0.0063	0.74173	940	35	1058	66	96.8074
SBM-6_87	721	285.7	0.396255	15.36	0.31	0.53	0.015	0.7715	2737	64	2902	33	96.5432
SBM-6_88	426	609	1.42958	0.801	0.017	0.0928	0.0024	0.60619	572	14	717	60	96.1345
SBM-6_89	664	446	0.671687	0.672	0.016	0.0811	0.0021	0.74818	502	12	600	44	96.1133
SBM-6_90	126.9	156.6	1.23404	3.508	0.082	0.256	0.0092	0.58929	1466	47	1593	57	96.0682
SBM-6_91	238	118.6	0.498319	0.859	0.019	0.0983	0.0027	0.52126	604	16	682	56	95.873
SBM-6_92	374	369	0.986631	10.84	0.13	0.4512	0.0078	0.76412	2399	34	2617	23	95.6539
SBM-6_93	606	532.8	0.879208	0.749	0.026	0.0876	0.0013	0.51447	541	7.7	656	55	95.583
SBM-6_94	230.7	101	0.437798	1.056	0.038	0.114	0.0031	0.77	695	18	848	46	95.3361
SBM-6_95	792	563	0.710859	15.73	0.33	0.524	0.018	0.75153	2722	79	2936	42	95.2748
SBM-6_96	226.9	117.6	0.51829	6	0.22	0.338	0.013	0.79477	1874	62	2097	38	95.0786
SBM-6_97	716	476	0.664804	20.42	0.43	0.579	0.012	0.91198	2943	48	3227	21	94.6911
SBM-6_98	467	74.3	0.159101	6.69	0.1	0.3558	0.008	0.73823	1960	38	2144	34	94.6403
SBM-6_99	236	476	2.01695	1.606	0.037	0.1531	0.004	0.66012	918	23	1083	39	94.5417
SBM-6_100	452	233.5	0.516593	17.11	0.32	0.536	0.015	0.70623	2764	60	3057	32	94.0456
SBM-6_101	310	138.3	0.446129	11.4	0.24	0.452	0.013	0.84977	2400	58	2696	35	94.0071
SBM-6_102	113.7	120.8	1.06245	0.78	0.026	0.0896	0.0035	0.42895	552	20	668	90	93.5593
SBM-6_103	80	76.8	0.96	0.876	0.043	0.0946	0.0025	0.40587	583	15	773	74	92.5397
SBM-6_104	650	410	0.630769	0.625	0.011	0.0731	0.0024	0.7454	454	14	661	47	92.2015
SBM-6_105	111.4	118	1.05925	0.659	0.023	0.0759	0.0031	0.62141	471	19	731	78	91.9922
SBM-6_106	273	307	1.12454	4.42	0.087	0.2754	0.0094	0.7013	1572	49	1884	52	91.6084
SBM-6_107	652	632	0.969325	5.017	0.097	0.2951	0.0062	0.9339	1666	31	2008	12	91.5385
SBM-6_108	992	166.5	0.167843	13.21	0.33	0.46	0.017	0.87166	2434	73	2897	40	90.4833
SBM-6_109	215.4	180.9	0.839833	4.938	0.08	0.2883	0.0074	0.87212	1631	37	2034	34	90.2601
SBM-6_110	386	214	0.554404	0.901	0.056	0.0948	0.0031	0.28769	583	18	900	120	90.2477
SBM-6_111	316	150.8	0.477215	4.403	0.068	0.2711	0.005	0.90141	1545	25	1919	17	90.2453
SBM-6_112	105.4	88.5	0.839658	3.115	0.078	0.2204	0.008	0.71794	1282	42	1690	55	89.2758
SBM-6_113	144	138.4	0.961111	0.949	0.032	0.0972	0.0029	0.49208	597	17	949	68	88.4444
SBM-6_114	1780	820	0.460674	0.603	0.023	0.0667	0.0023	0.59516	416	14	801	64	87.2117
SBM-6_115	491	325	0.661914	4.28	0.21	0.249	0.012	0.86886	1437	60	1998	46	85.434
SBM-6_116	287	152	0.529617	11.94	0.42	0.4	0.015	0.90354	2161	69	2975	19	83.3076
SBM-6_117	357	107.3	0.30056	3.14	0.17	0.1743	0.0077	0.91018	1033	42	2142	41	71.9861

## Sheet: Table 6- sample Sbm-7
	U	Th	Th/U	207Pb/235U	2sigma err	206Pb/238U	2sigma err	Rho	207Pb/235Uage	2sigma err	206Pb/238Uage	2sigma err	207Pb/206Pbage	2sigma err	%Conc
SBM-07-1	238.4	91.8	2.419	0.47	0.013	0.05698	0.00096	0.22748	390.3	8.6	357.2	5.9	518	61	91.5193
SBM-07-2	877	853	0.954	0.709	0.015	0.0802	0.0023	0.5502	543.3	8.9	497	14	687	53	91.478
SBM-07-3	1030	389	2.6	0.682	0.025	0.0768	0.0026	0.69982	527	15	477	16	778	55	90.5123
SBM-07-4	346	244.8	1.434	0.579	0.029	0.0586	0.0017	0.26347	461	18	367	10	890	110	79.6095
SBM-07-5	152.6	104.6	1.486	0.692	0.023	0.0789	0.0024	0.40127	533	14	489	14	685	73	91.7448
SBM-07-6	840	494	1.894	12.31	0.73	0.381	0.023	0.92062	2611	56	2060	100	3017	41	78.897
SBM-07-7	537	166.1	3.36	0.848	0.017	0.0962	0.0028	0.48208	622.9	9.2	592	16	700	58	95.0393
SBM-07-8	327	312	1.109	0.855	0.023	0.0984	0.003	0.66241	627	13	605	18	692	49	96.4912
SBM-07-9	347	151	2.336	7.2	0.14	0.3881	0.0098	0.65356	2135	17	2111	46	2151	34	98.8759
SBM-07-10	208.7	94.5	2.45	0.959	0.049	0.112	0.0049	0.70285	677	25	683	28	680	63	100.886
SBM-07-11	210	101.6	2.17	0.762	0.016	0.0945	0.0016	0.15885	577.9	9.5	581.8	9.4	523	54	100.675
SBM-07-12	123.2	45.3	2.813	1.645	0.037	0.1664	0.0029	0.53963	988	15	992	16	978	40	100.405
SBM-07-13	258	173.6	1.53	1.389	0.045	0.1477	0.0033	0.65194	886	18	888	18	865	50	100.226
SBM-07-14	129.8	107.3	1.24	1.659	0.044	0.1687	0.0033	0.51263	991	17	1005	18	1002	42	101.413
SBM-07-15	26.31	28.15	0.927	1.384	0.075	0.1472	0.0049	0.044236	877	32	884	27	870	130	100.798
SBM-07-16	364.4	122.7	2.928	7.28	0.12	0.3767	0.0066	0.62875	2149	15	2060	31	2269	19	95.8585
SBM-07-17	109.1	173.5	0.609	1.616	0.092	0.1649	0.0041	0.38788	973	35	983	23	930	110	101.028
SBM-07-18	242.6	184.7	1.305	3.444	0.071	0.2571	0.0044	0.61258	1513	16	1474	23	1592	32	97.4223
SBM-07-19	1229	1247	0.983	3.24	0.15	0.2422	0.0078	0.38109	1465	37	1409	36	2864	29	96.1775
SBM-07-20	935	489	1.937	0.953	0.026	0.1104	0.002	0.52542	678	13	675	12	710	42	99.5575
SBM-07-21	422.5	196.2	2.177	2.157	0.066	0.1891	0.0047	0.42934	1170	21	1116	26	1241	61	95.3846
SBM-07-22	1600	803	1.981	0.715	0.026	0.088	0.0025	0.75415	547	15	543	15	560	52	99.2687
SBM-07-23	931	895	1.067	0.718	0.02	0.0885	0.0018	0.47132	549	12	547	10	537	57	99.6357
SBM-07-24	308	268.5	1.128	0.984	0.051	0.1113	0.0045	0.46373	694	26	680	26	700	98	97.9827
SBM-07-25	235.4	133.2	1.703	1.472	0.04	0.1438	0.003	0.40949	921	16	866	17	1013	55	94.0282
SBM-07-26	392	228	1.64	1.045	0.038	0.0957	0.0019	0.3182	723	19	589	11	1313	56	81.4661
SBM-07-27	473	649	0.68	2.002	0.075	0.1104	0.0023	0.41841	1115	25	675	13	2198	56	60.5381
SBM-07-28	74.5	40.9	1.733	0.932	0.061	0.103	0.0028	0.019493	667	31	631	16	800	150	94.6027
SBM-07-29	81.6	149.4	0.546	0.715	0.08	0.0957	0.0048	0.083706	545	47	589	28	310	250	108.073
SBM-07-30	620	343	1.84	17.68	0.52	0.591	0.016	0.81696	2970	28	2990	66	2882	33	100.673
SBM-07-31	249.4	203	1.242	0.913	0.035	0.1075	0.0029	0.35036	657	19	658	17	511	88	100.152
SBM-07-32	69.9	37.7	1.877	1	0.081	0.1139	0.0027	0.055343	698	42	695	15	660	180	99.5702
SBM-07-33	59.7	78.6	0.835	0.8	0.049	0.0959	0.0027	0.056489	598	28	590	16	490	130	98.6622
SBM-07-34	163.8	123.3	1.333	6.9	0.12	0.3825	0.006	0.42557	2100	16	2092	27	2057	29	99.619
SBM-07-35	476	297	1.601	15.92	0.31	0.561	0.014	0.78669	2870	19	2877	59	2891	24	100.244
SBM-07-36	542	587	0.999	4.128	0.067	0.2613	0.0049	0.53958	1659	13	1496	25	1941	29	90.1748
SBM-07-37	80.4	58.6	1.473	1.691	0.064	0.1684	0.0048	0.49627	1006	23	1003	26	1106	75	99.7018
SBM-07-38	255.7	143	2.42	0.797	0.026	0.0957	0.0019	0.49292	594	15	589	11	707	64	99.1582
SBM-07-39	69	61.04	1.225	0.896	0.052	0.1001	0.0022	0.15293	649	27	615	13	800	130	94.7612
SBM-07-40	304.6	323	1.022	0.767	0.021	0.0876	0.0017	0.23556	577	12	541	10	748	56	93.7608
SBM-07-41	59.9	31.3	1.914	0.85	0.027	0.1046	0.0029	0.56709	627	16	641	17	487	59	102.233
SBM-07-42	115.5	62.1	1.856	6.72	0.13	0.3794	0.0079	0.84745	2073	16	2073	37	2033	19	100
SBM-07-43	96.1	74.4	1.292	0.882	0.036	0.1049	0.0028	0.74115	640	19	643	16	604	60	100.469
SBM-07-44	93.2	67.3	1.354	2.562	0.069	0.2243	0.0059	0.72608	1288	20	1304	31	1253	36	101.242
SBM-07-45	74.5	50	1.49	5.24	0.13	0.3314	0.0087	0.84557	1857	22	1844	42	1848	22	99.2999
SBM-07-46	51.5	18.5	2.99	0.853	0.037	0.1054	0.0027	0.4514	625	20	646	16	514	73	103.36
SBM-07-47	89.2	68.8	1.292	0.817	0.027	0.0986	0.0022	0.62065	608	16	606	13	583	58	99.6711
SBM-07-48	190.2	73	2.562	0.75	0.025	0.0935	0.0025	0.61987	567	14	576	15	491	53	101.587
SBM-07-49	107	79	1.463	0.858	0.034	0.1056	0.0029	0.72744	631	19	647	17	553	52	102.536
SBM-07-50	169.9	202.7	0.8321	0.496	0.013	0.0662	0.0016	0.08376	409	9.1	413.3	9.4	377	66	101.051
SBM-07-51	50.93	73.82	0.6814	8.84	0.2	0.4319	0.0089	0.81964	2319	21	2313	40	2297	21	99.7413
SBM-07-52	355	259	1.358	6.45	0.11	0.3632	0.0067	0.83753	2038	16	1996	32	2050	12	97.9392
SBM-07-53	113.5	78.6	1.454	0.746	0.027	0.0925	0.0026	0.64131	568	15	570	15	530	50	100.352
SBM-07-54	62.8	76.3	0.813	10.19	0.25	0.467	0.011	0.71562	2458	22	2470	50	2409	18	100.488
SBM-07-55	272.7	253	1.075	0.86	0.029	0.1053	0.0035	0.76038	629	16	645	20	558	31	102.544
SBM-07-56	88.3	80.6	1.1	0.89	0.037	0.1088	0.0034	0.70732	648	21	666	19	551	61	102.778
SBM-07-57	190.2	97	1.954	3.361	0.082	0.2642	0.0067	0.85501	1494	19	1511	35	1441	22	101.138
SBM-07-58	449	19.2	23.8	0.785	0.017	0.0979	0.002	0.64343	589.6	9.2	602	12	518	34	102.103
SBM-07-59	427	119.2	3.562	0.793	0.014	0.0976	0.0018	0.44954	592.8	8.1	600	10	524	30	101.215
SBM-07-60	245.1	231.1	1.045	0.726	0.017	0.0899	0.0017	0.2399	553.5	9.9	555.1	9.8	484	65	100.289
SBM-07-61	594	752	0.78	0.771	0.024	0.094	0.0022	0.82085	579	14	579	13	555	32	100
SBM-07-62	165.8	84.9	1.945	0.787	0.022	0.097	0.0016	0.50513	589	12	596.9	9.4	524	41	101.341
SBM-07-63	208.8	159.8	1.286	0.817	0.026	0.1044	0.0027	0.73392	608	15	640	16	491	40	105.263
SBM-07-64	43.52	53.27	0.8047	0.796	0.03	0.1007	0.0023	0.17855	597	16	618	14	475	91	103.518
SBM-07-65	170.5	110.1	1.54	0.771	0.027	0.0952	0.0026	0.69583	579	16	586	15	530	53	101.209
SBM-07-66	1196	408	2.957	1.226	0.036	0.1235	0.0036	0.92988	818	17	750	21	986	21	91.687
SBM-07-67	554	406	1.366	0.841	0.022	0.1039	0.0023	0.87247	619	12	637	13	549	24	102.908
SBM-07-68	155.1	79.8	1.936	5.92	0.12	0.3552	0.0073	0.77689	1963	18	1958	35	1944	16	99.7453
SBM-07-69	399	222.4	1.77	1.758	0.046	0.1769	0.0043	0.89578	1029	17	1050	23	962	17	102.041
SBM-07-70	32.33	232.7	0.138	13.43	0.28	0.4995	0.0086	0.68314	2712	19	2611	37	2739	19	96.2758
SBM-07-71	258.4	198	1.34	0.782	0.022	0.0977	0.0024	0.7316	586	12	601	14	509	44	102.56
SBM-07-72	166.3	100.7	1.643	0.777	0.023	0.0962	0.0025	0.55491	583	13	592	15	585	38	101.544
SBM-07-73	198	188.5	1.033	0.844	0.026	0.1032	0.0026	0.75245	623	14	633	15	560	44	101.605
SBM-07-74	139.7	133.4	1.0385	5.35	0.14	0.3465	0.0091	0.90867	1875	22	1917	44	1825	16	102.24
SBM-07-75	202.8	171.4	1.167	6.46	0.18	0.382	0.0096	0.95029	2038	26	2084	45	1986	15	102.257
SBM-07-76	224.6	179.8	1.235	0.719	0.024	0.0823	0.0032	0.79013	549	14	509	19	697	38	92.714
SBM-07-77	29.04	25.15	1.152	0.805	0.051	0.0963	0.0023	0.29536	596	29	592	14	600	130	99.3289
SBM-07-78	110.4	83.3	1.272	0.78	0.025	0.0979	0.003	0.6339	585	15	605	17	525	50	103.419
SBM-07-79	186.6	139	1.357	10.96	0.26	0.447	0.01	0.87862	2517	22	2380	46	2631	16	94.557
SBM-07-80	69.51	23.62	2.935	1.471	0.047	0.152	0.0034	0.78857	917	20	912	19	934	39	99.4547
SBM-07-81	318	56.3	5.603	1.708	0.055	0.1755	0.0049	0.91104	1010	21	1042	27	951	26	103.168
SBM-07-82	65.2	59.6	1.085	4.8	0.15	0.326	0.01	0.88887	1786	26	1818	49	1724	26	101.792
SBM-07-83	116.9	99.8	1.1688	10.17	0.27	0.471	0.013	0.91141	2452	24	2486	55	2414	15	101.387
SBM-07-84	75.3	43.8	1.743	0.836	0.035	0.1017	0.0036	0.65308	620	19	624	21	597	71	100.645
SBM-07-85	1108	879	1.265	0.338	0.011	0.0459	0.0014	0.9064	295.4	8.2	289	8.8	323	26	97.8334
SBM-07-86	251.2	142.2	1.761	3.66	0.1	0.2583	0.0079	0.90171	1560	23	1480	40	1672	21	94.8718
SBM-07-87	201.7	311.8	0.639	15.06	0.27	0.509	0.01	0.70841	2818	17	2662	45	2932	24	94.4642
SBM-07-88	583.2	495	1.166	0.753	0.02	0.0896	0.0017	0.78378	569	12	553	10	644	34	97.188
SBM-07-89	1266	1385	0.923	0.2873	0.0096	0.0379	0.0013	0.834	256.2	7.6	239.6	8.1	427	47	93.5207
SBM-07-90	31.43	24.61	1.265	0.797	0.035	0.0969	0.0024	0.2558	593	20	596	14	560	130	100.506
SBM-07-91	82.6	27.11	3.032	0.884	0.032	0.1046	0.0019	0.28606	642	17	641	11	643	75	99.8442
SBM-07-92	473.3	22.9	23.7	0.793	0.021	0.0973	0.0027	0.72327	592	12	598	16	594	39	101.014
SBM-07-93	151.7	114.9	1.32	0.895	0.021	0.108	0.0015	0.42278	648	11	661	8.6	586	46	102.006
SBM-07-94	518.3	380	1.377	5.69	0.15	0.3074	0.0092	0.85612	1927	22	1727	45	2164	22	89.6212
SBM-07-95	273.8	477	0.588	0.924	0.028	0.1105	0.0029	0.7201	663	15	675	17	653	50	101.81
SBM-07-96	84.1	48.5	1.731	1.71	0.047	0.167	0.0045	0.47467	1011	18	1000	26	1023	58	98.912
SBM-07-97	115.4	30.38	3.788	6.48	0.2	0.374	0.012	0.83989	2051	28	2055	55	2065	29	100.195
SBM-07-98	464	399	1.147	0.776	0.027	0.0964	0.0035	0.76919	582	16	593	21	528	48	101.89
SBM-07-99	218.2	152.7	1.425	0.913	0.029	0.1095	0.0028	0.63411	658	16	673	16	625	49	102.28
SBM-07-100	1213	305.9	3.979	14.83	0.28	0.546	0.01	0.75321	2807	19	2808	44	2816	25	100.036
SBM-07-101	336.2	137.2	2.43	1.77	0.053	0.1736	0.0054	0.80873	1033	19	1031	29	1045	32	99.8064
SBM-07-102	126.5	238	0.531	2.49	0.25	0.0844	0.0037	0.64632	1248	69	522	22	2890	110	41.8269
SBM-07-103	415.2	126.2	3.25	18.64	0.3	0.591	0.012	0.65034	3022	16	2991	47	3050	19	98.9742
SBM-07-104	150.5	74.3	2.025	2.131	0.047	0.194	0.0031	0.53165	1158	15	1143	17	1188	36	98.7047
SBM-07-105	64.5	38.21	1.669	0.926	0.027	0.1066	0.0026	0.062736	665	14	653	15	738	83	98.1955
SBM-07-106	471.2	470.8	1.02	0.768	0.012	0.0952	0.0017	0.63582	578.3	6.9	586.1	9.8	578	35	101.349
SBM-07-107	275.9	204.9	1.349	0.776	0.025	0.094	0.002	0.67687	585	14	579	12	587	49	98.9744
SBM-07-108	102.5	116.3	0.88	0.782	0.021	0.0944	0.0017	0.48031	586	12	581.3	9.9	609	50	99.198
SBM-07-109	136.1	62.6	2.176	0.735	0.016	0.09159	0.00098	0.21157	559.4	9.6	564.9	5.8	556	50	100.983
SBM-07-110	591	282	2.077	17.68	0.21	0.5424	0.008	0.80082	2972	12	2793	33	3118	18	93.9771
